# Supplementary material for: Intramolecular Buchwald–Hartwig N -arylation of bicyclic hydrazines: practical access to spiro[indoline-2,3′-piperidines]
Source: Royal Society of Chemistry journal article supplement (doi:10.1039/d3ob00406f), 2023-01-01

# **Intramolecular Buchwald-Hartwig N-Arylation of Bicyclic Hydrazines: Practical Access to Spiro[indoline-2,3'-piperidines]**

Claire Fleurisson,<sup>a</sup> Nessrine Graidia,<sup>a</sup> Yann Foricher,<sup>b</sup> Erica Benedetti,<sup>a,\*</sup>  
and Laurent Micouin<sup>a,\*</sup>

<sup>a</sup> *Université Paris Cité, CNRS, Laboratoire de Chimie et de Biochimie  
Pharmacologiques et Toxicologiques, F-75006 Paris, France*

<sup>b</sup> *Sanofi R&D, Integrated Drug Discovery, F-94400 Vitry-sur-Seine, France*

Supporting Information

## Table of contents

|                                                                                                                    |     |
|--------------------------------------------------------------------------------------------------------------------|-----|
| General remarks                                                                                                    | S3  |
| Synthetic procedures and characterization data                                                                     | S4  |
| <i>Synthesis of di-tert-Butyl 1-(2-bromobenzyl)-2,3-diazabicyclo[2.2.1]hept-5-ene-2,3-dicarboxylate</i>            | S4  |
| <i>Synthesis of di-tert-Butyl 1-(2-bromobenzyl)-5,6-dihydroxy-2,3-diazabicyclo[2.2.1]heptane-2,3-dicarboxylate</i> | S5  |
| <i>General procedure A: Oxidative cleavage and reductive amination</i>                                             | S5  |
| <i>General procedure B: Deprotection and intramolecular Buchwald – Hartwig N-arylation</i>                         | S10 |
| <i>General procedure C: Hydrogenolysis and Boc-protection of the free amino groups</i>                             | S14 |
| <i>General procedure D: Boc-deprotection</i>                                                                       | S18 |
| <sup>1</sup> H NMR and <sup>13</sup> C NMR spectra                                                                 | S22 |

## List of abbreviations

|                     |                                     |
|---------------------|-------------------------------------|
| AcOH                | Acetic acid                         |
| Boc                 | Tert-Butyl carbamate                |
| Boc <sub>2</sub> O  | Dicarbonate de di-tert-butyle       |
| DABD                | di-tert-Butyl azodicarboxylate      |
| DCM                 | Dichloromethane                     |
| DMSO                | Dimethyl sulfoxide                  |
| ESI                 | Electrospray ionization             |
| Et <sub>2</sub> O   | Diethyl ether                       |
| Et <sub>3</sub> N   | Triethylamine                       |
| EtOAc               | Ethyl acetate                       |
| HPLC                | High pressure liquid chromatography |
| HRMS                | High resolution mass spectrometry   |
| IR                  | Infrared                            |
| MeOH                | Methanol                            |
| NaO <sup>t</sup> Bu | Sodium tert-butoxide                |
| <i>n</i> BuLi       | <i>n</i> -Butyllithium              |
| NMO                 | N-Methylmorpholine N-oxide          |
| NMR                 | Nuclear magnetic resonance          |
| r.t.                | Room temperature                    |
| STAB                | Sodium triacetoxyborohydride        |
| THF                 | tetrahydrofuran                     |
| TLC                 | Thin layer chromatography           |
| TMEDA               | Tetramethyl ethylenediamine         |
| UV                  | Ultraviolet                         |

## **General Remarks**

All reactions were carried out under inert atmosphere in oven-dried glassware, using dry solvents unless otherwise specified. Anhydrous solvents were bought from Merck Chemicals. Commercially available chemicals were purchased from Acros, Sigma-Aldrich, Alfa Aesar, VWR, StremChemicals, Enamine or Fluorochem and used as received. Analytical thin layer chromatography (TLC) was performed on silica gel plates (Merck 60F254) visualized with a UV lamp (254 nm) or permanganate, phosphomobyliden and ninhydrin stain solutions, followed by heating. Flash chromatography was performed on silica gel (60-230 mesh) unless otherwise stated. Organic extracts were dried over anhydrous MgSO<sub>4</sub>. NMR spectra (<sup>1</sup>H and <sup>13</sup>C{<sup>1</sup>H}) were recorded on Bruker Avancell 500 spectrometer, at 500 MHz (H value) in CDCl<sub>3</sub>, DMSO-*d*<sub>6</sub>, CD<sub>3</sub>OD or D<sub>2</sub>O. Spectra were referenced to residual non-deuterated solvent signal (chloroform: 7.26 ppm, <sup>1</sup>H; 77.0 ppm, <sup>13</sup>C{<sup>1</sup>H}. DMSO-*d*<sub>6</sub>: 2.50 ppm, <sup>1</sup>H; 39.52 ppm, <sup>13</sup>C{<sup>1</sup>H}. CD<sub>3</sub>OD: 3.31 ppm, <sup>1</sup>H; 49.00 ppm, <sup>13</sup>C{<sup>1</sup>H}. D<sub>2</sub>O: 4.79 ppm, <sup>1</sup>H). Chemical shifts are reported in ppm, multiplicities are indicated by s (singlet), d (doublet), t (triplet), q (quartet), p (pentet), and m (multiplet or overlap of nonequivalent resonances), dd (doublet of doublet), td (triplet of doublet), and br (broad signal). Coupling constants, *J*, are reported in hertz (Hz). All NMR spectra were obtained at 300K unless otherwise specified. IR spectra were obtained using a spectrum one FT-IR spectrometer (Perkin Elmer). High Resolution mass spectra were recorded on a ThermoFischer Exactive Orbitrap spectrometer. HPLC analyses were performed on a Shimadzu chromatograph equipped with a diode array UV/VIS detector.

## Synthetic procedures and characterization data

### Synthesis of di-tert-Butyl 1-(2-bromobenzyl)-2,3-diazabicyclo[2.2.1]hept-5-ene-2,3-dicarboxylate

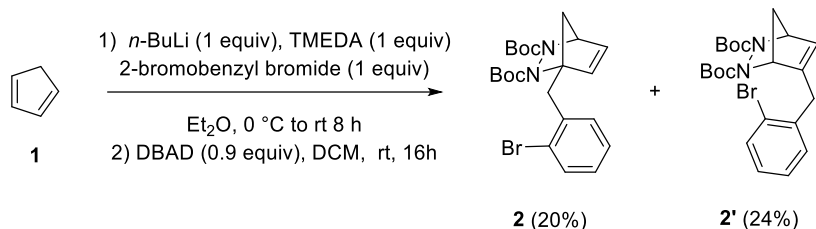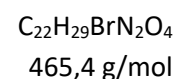

To a solution of freshly distilled cyclopentadiene (0.05 mL, 0.59 mmol, 1.0 eq.) and TMEDA (0.09 mL, 0.59 mmol, 1.0 eq.) in ether (2 mL) was added dropwise *n*-BuLi (0.28 mL, 0.59 mmol, 1.0 eq, 2.15 M in hexane) at 0 °C. The mixture was stirred for 6h at r.t. then cooled down to 0 °C. 2-Bromobenzyl bromide (152 mg, 0.59 mmol, 1.0 eq.) dissolved in ether (1 mL) was added and the resulting solution was stirred at r.t. for 2h. The reaction mixture was then quenched with a saturated NH<sub>4</sub>Cl solution. The aqueous phase was extracted with DCM (3x). The combined organic phases were dried over MgSO<sub>4</sub>, filtered, and concentrated under reduced pressure at r.t. The residue was dissolved in DCM (1 mL) and DBAD (119 mg, 0.52 mmol, 0.9 eq.) was added. The resulting mixture was stirred overnight at r.t., and then concentrated *in vacuo*. The crude product was purified by silica gel column chromatography (eluent: cyclohexane/EtOAc, 95/5 to 92/8) to afford **2** (56 mg, 0.12 mmol, 20 %) and **2'** (67 mg, 0.14 mmol, 24 %) as white amorphous solids. This procedure was reproduced several times and successfully scaled up to 5 g of starting material.

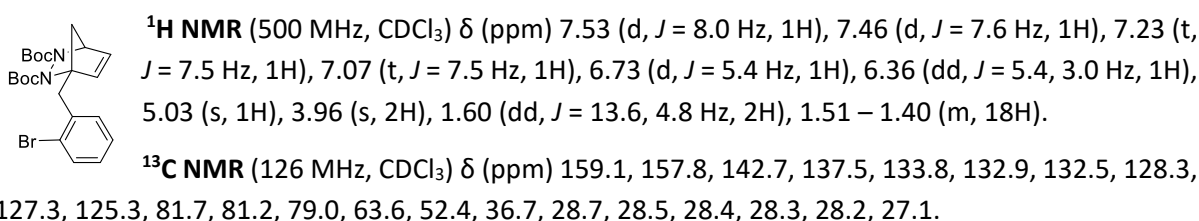

**HRMS** (ESI+-Orbitrap) *m/z*: [M+H]<sup>+</sup> Calcd for C<sub>22</sub>H<sub>30</sub>N<sub>2</sub>O<sub>4</sub>Br 465.1383, found 465.1382.

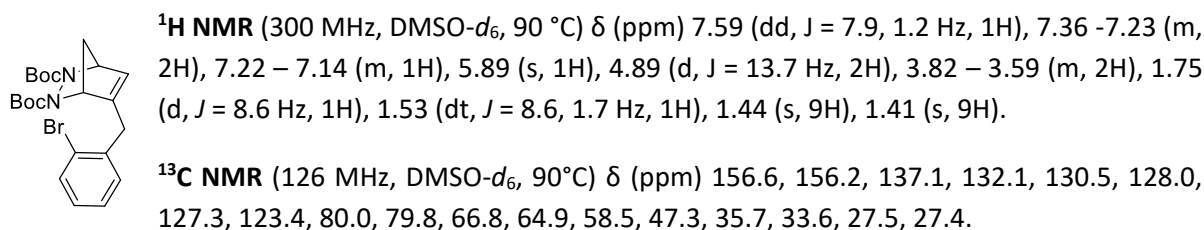

**HRMS** (ESI+-Orbitrap) *m/z*: [M+H]<sup>+</sup> Calcd for C<sub>22</sub>H<sub>30</sub>N<sub>2</sub>O<sub>4</sub>Br 465.1383, found 465.1379.

*Synthesis of di-tert-Butyl 1-(2-bromobenzyl)-5,6-dihydroxy-2,3-diazabicyclo[2.2.1]heptane-2,3-dicarboxylate*

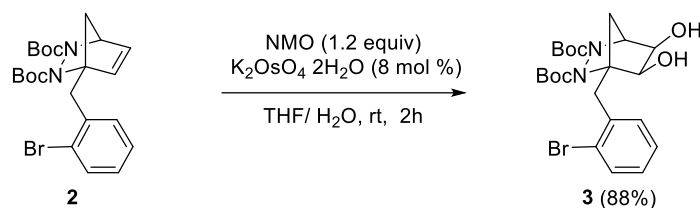

$\text{C}_{22}\text{H}_{31}\text{BrN}_2\text{O}_6$   
499,4 g/mol

To a solution of **2** (536 mg, 1.15 mmol, 1.0 eq.) in THF (10 mL) were added NMO (162 mg, 1.36 mmol, 1.2 eq.) in water (1 mL), and  $\text{K}_2\text{OsO}_4 \cdot 2\text{H}_2\text{O}$  (3 mg, 0.001 mmol, 0.008 eq.). The resulting mixture was stirred at r.t. for 2 h. A solution of  $\text{NaHSO}_3$  (15 % in water) was then added. The aqueous phase was extracted with ether (3x). The combined organic layers were washed with brine, dried over  $\text{MgSO}_4$ , filtered, and concentrated under reduced pressure. The crude residue was purified by silica gel column chromatography (eluent: pentane/EtOAc, 8/2 to 7/3) to afford product **3** (500 mg, 1.00 mmol, 87 %) as a white amorphous solid. This procedure was reproduced several times.

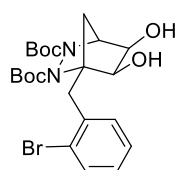

$^1\text{H NMR}$  (500 MHz,  $\text{CDCl}_3$ )  $\delta$  (ppm) 7.51 (m, 2H), 7.22 (t,  $J = 7.5$  Hz, 1H), 7.07 (t,  $J = 7.6$  Hz, 1H), 4.21 – 4.10 (br s, 3H), 4.01 – 3.81 (br s, 1H), 3.70 – 3.61 (br m, 2H), 3.57 (br s, 1H), 2.14 (d,  $J = 11.4$  Hz, 1H), 1.53 (s, 9H), 1.31 (s, 9H), 1.12 (d,  $J = 11.2$  Hz, 1H).

$^{13}\text{C NMR}$  (126 MHz,  $\text{CDCl}_3$ )  $\delta$  (ppm) 157.4 (br s), 156.8 (br s), 137.5, 132.7, 128.1, 127.2, 125.6, 81.8, 75.7 (br s), 72.2, 71.5, 61.6 (br s), 35.6, 32.4, 28.5, 28.0.

**HRMS** (ESI+-Orbitrap)  $m/z$ :  $[\text{M}-\text{H}]^-$  Calcd for  $\text{C}_{22}\text{H}_{30}\text{N}_2\text{O}_6\text{Br}$  497.1293, found 497.1294.

*General procedure A: Oxidative cleavage and reductive amination*

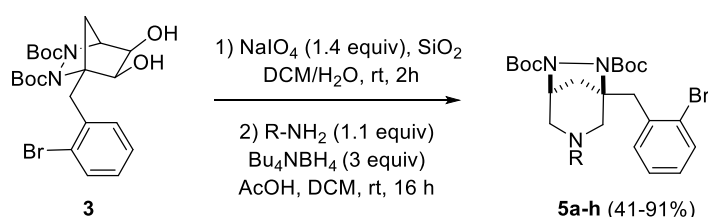

To a vigorously stirred solution of silica (column grade) in DCM (0.03 M),  $\text{NaIO}_4$  (0.65 M, 1.4 eq.) in  $\text{H}_2\text{O}$  were added dropwise until formation of a flaky suspension was observed. A solution of diol **3** (1.0 eq.) in DCM (0.03 M) was then added. The mixture was monitored by TLC and kept under stirring until complete consumption of the starting material. The solution was then filtered through a sintered glass funnel packed with  $\text{Na}_2\text{SO}_4$  and concentrated under reduced pressure. The resulting residue was dissolved in DCM (0.5 M) and the corresponding amine (1.1 eq.) was added followed by the reducing agent (3.0 eq.) and AcOH (1.8 eq.). The mixture was stirred for 16 h at r.t. before being quenched with a saturated aqueous  $\text{NaHCO}_3$  solution. The aqueous phase was extracted with DCM (3x). The combined organic layers were dried over  $\text{MgSO}_4$ , filtered, and concentrated *in vacuo*. Flash chromatography over silica gel (eluent: cyclohexane/EtOAc) finally afforded the desired product.

**Note:** Products **5a-h**, obtained after the reductive amination step, have all been isolated as mixture of rotamers or invertomers. Consequently, splitting of the signals are observed in  $^1\text{H}$  and  $^{13}\text{C}$  NMR spectra.

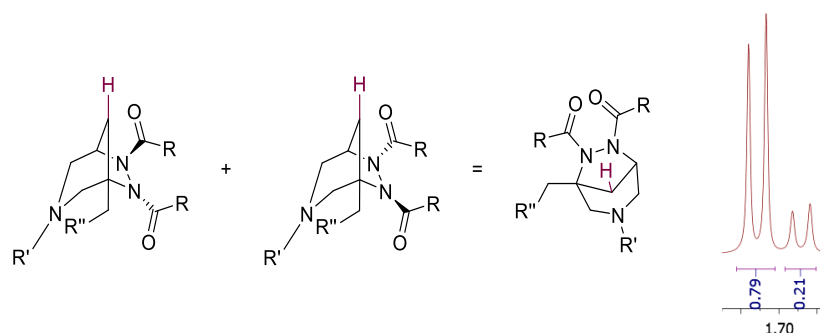

- *di-tert-Butyl* 1-(2-bromobenzyl)-3-(4-methoxybenzyl)-3,6,7-triazabicyclo[3.2.1]octane-6,7-dicarboxylate (**5a**)

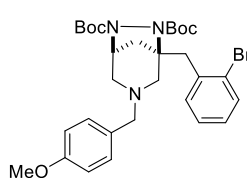

$\text{C}_{30}\text{H}_{40}\text{BrN}_3\text{O}_5$   
602.6 g/mol

Product **5a** was synthesized according to the general procedure A using Silica (1.4 g),  $\text{NaIO}_4$  (200 mg, 0.93 mmol, 1.4 eq.), compound **3** (333 mg, 0.67 mmol, 1.0 eq.), 4-methoxybenzylamine (0.1 mL, 0.73 mmol, 1.1 eq.), *tetra*-butylammonium borohydride (515 mg, 2.00 mmol, 3.0 eq.), AcOH (0.1 mL, 1.20 mmol, 1.8 eq.), and DCM (25 mL, 2 mL). Flash chromatography over silica gel (Cyclohexane/EtOAc, 9/1) afforded the title compound (254 mg, 0.42 mmol, 63 %) as a white amorphous solid.

$^1\text{H}$  NMR (500 MHz,  $\text{CDCl}_3$ )  $\delta$  (ppm) 7.54 – 7.43 (m, 2H), 7.26 – 7.21 (m, 3H), 7.07 (m, 1H), 6.88 – 6.82 (m, 2H), 4.26 (m, 1H), 3.83 – 3.76 (m, 3.7H), 3.74 – 3.63 (m, 1H), 3.61 – 3.55 (m, 1H), 3.48 (m, 1H), 3.38 – 3.33 (m, 0.3H), 3.20 (m, 1H), 3.07 (m, 1H), 2.27 – 2.15 (m, 1H), 2.10 – 2.05 (m, 1H), 1.68 – 1.45 (m, 11H), 1.38 – 1.32 (m, 9H).

$^{13}\text{C}$  NMR (126 MHz,  $\text{CDCl}_3$ )  $\delta$  (ppm) 158.8, 158.8, 157.8, 155.7, 136.7, 136.4, 133.6, 133.1, 132.5, 132.4, 130.2, 130.1, 129.7, 129.5, 128.3, 128.1, 127.3, 126.2, 126.1, 113.9, 113.6, 81.0, 80.9, 80.8, 80.6, 67.8, 67.7, 61.0, 60.8, 60.5, 58.9, 55.4, 55.1, 54.6, 54.5, 40.4, 39.9, 38.2, 38.0, 28.7, 28.7, 28.2, 28.1, 27.1.

HRMS (ESI+-Orbitrap)  $m/z$ :  $[\text{M}+\text{H}]^+$  Calcd for  $\text{C}_{30}\text{H}_{41}\text{N}_3\text{O}_5\text{Br}$  602.2224, found 602.2211.

- *di-tert-Butyl* 1-(2-bromobenzyl)-3-(naphthalen-1-ylmethyl)-3,6,7-triazabicyclo[3.2.1]octane-6,7-dicarboxylate (**5b**)

Product **5b** was synthesized according to the general procedure A using Silica (2.5 g),  $\text{NaIO}_4$  (360 mg, 1.68 mmol, 1.4 eq.), compound **3** (600 mg, 1.20 mmol, 1.0 eq.), 1-naphthylmethylamine (0.20 mL, 1.32 mmol, 1.1 eq.), *tetra*-butylammonium borohydride (927 mg, 3.60 mmol, 3.0 eq.), AcOH (0.12 mL, 2.10 mmol, 1.8 eq.), and DCM (40 mL, 4 mL). Flash chromatography over silica gel (eluent: cyclohexane/EtOAc, 9/1) afforded the title compound (588 mg, 0.94 mmol, 79 %) as a white amorphous solid.

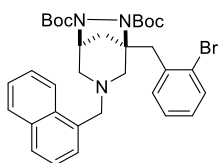

$C_{33}H_{40}BrN_3O_4$   
622.6 g/mol

**$^1H$  NMR** (500 MHz,  $CDCl_3$ )  $\delta$  (ppm) 8.16 (d,  $J = 8.4$  Hz, 0.3H), 8.05 (d,  $J = 8.2$  Hz, 0.5H), 7.84 (m, 1.2H), 7.74 (m, 1.5H), 7.57 – 7.42 (m, 5.7H), 7.25 – 7.22 (m, 0.8H), 7.12 – 7.02 (m, 1.2H), 4.58 (m, 0.1H), 4.31 (m, 1H), 4.12 (m, 1H), 3.95 (d,  $J = 13.5$  Hz, 0.4H), 3.85 (d,  $J = 14.0$  Hz, 0.6H), 3.75 (dd,  $J = 10.4$ , 1.3 Hz, 0.6H), 3.56 (d,  $J = 14.2$  Hz, 0.4H), 3.44 (t,  $J = 9.8$  Hz, 0.4H), 3.26 (m, 1.8H), 2.40 (d,  $J = 10.5$  Hz, 0.6H), 2.33 (d,  $J = 10.6$  Hz, 0.4H), 2.25 (d,  $J = 10.9$  Hz, 0.4H), 2.19 – 2.13 (m, 0.6H), 1.71 (d,  $J = 11.3$  Hz, 1H), 1.61 – 1.48 (m, 7.0H), 1.42 – 1.24 (m, 12.7H).

**$^{13}C$  NMR** (126 MHz,  $CDCl_3$ )  $\delta$  (ppm) 159.7, 159.5, 156.9, 138.5, 138.3, 135.8, 135.7, 135.6, 135.4, 134.9, 134.8, 134.4, 134.3, 134.2, 133.9, 133.1, 132.4, 131.8, 131.6, 131.3, 130.7, 130.3, 130.1, 130.0, 129.7, 129.3, 129.2, 129.2, 128.4, 128.1, 128.0, 127.9, 127.6, 127.4, 127.3, 127.2, 126.3, 125.2, 123.6, 82.9, 82.8, 82.7, 82.6, 69.6, 69.1, 63.0, 61.8, 61.2, 59.5, 59.2, 58.0, 57.3, 56.5, 55.6, 42.3, 41.9, 40.1, 39.9, 30.4, 30.3, 30.1, 29.9, 28.9.

**HRMS** (ESI+-Orbitrap)  $m/z$ :  $[M+H]^+$  Calcd for  $C_{33}H_{41}N_3O_4Br$  622.2275, found 622.2261.

- *di-tert-Butyl 1-(2-bromobenzyl)-3-(3-Fluorophenethyl)-3,6,7-triazabicyclo[3.2.1]octane-6,7-dicarboxylate (5c)*

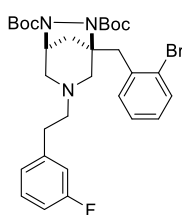

$C_{30}H_{39}BrFN_3O_4$   
604.6 g/mol

Product **5c** was synthesized according to the general procedure A using Silica (2.1 g),  $NaIO_4$  (300 mg, 1.40 mmol, 1.4 eq.), compound **3** (500 mg, 1.00 mmol, 1.0 eq.), fluorophenethylamine (0.14 mL, 1.10 mmol, 1.1 eq.), STAB (637 mg, 3.00 mmol, 3.0 eq.), AcOH (0.1 mL, 1.80 mmol, 1.8 eq.), and DCM (30 mL, 30 mL, 10 mL). Flash chromatography over silica gel (eluent: cyclohexane/EtOAc, 8/2) afforded the title compound (548 mg, 0.91 mmol, 91 %) as a white amorphous solid.

**$^1H$  NMR** (500 MHz,  $CDCl_3$ )  $\delta$  (ppm) 7.54 – 7.48 (m, 1H), 7.46 (t,  $J = 8.0$  Hz, 1H), 7.24 (m, 2H), 7.07 (q,  $J = 8.4$  Hz, 1H), 6.93 (d,  $J = 7.6$  Hz, 1H), 6.87 (dd,  $J = 15.8$ , 9.1 Hz, 2H), 4.32 (d,  $J = 3.4$  Hz, 1H), 3.78 (d,  $J = 14.1$  Hz, 0.6H), 3.64 (d,  $J = 10.2$  Hz, 0.6H), 3.60 (d,  $J = 14.2$  Hz, 0.4H), 3.43 (d,  $J = 10.4$  Hz, 0.4H), 3.27 – 3.18 (m, 1.4H), 3.14 (d,  $J = 8.5$  Hz, 0.6H), 2.81 – 2.73 (m, 2H), 2.73 – 2.64 (m, 2H), 2.35 – 2.23 (m, 1.4H), 2.17 (d,  $J = 10.4$  Hz, 0.6H), 1.68 (d,  $J = 11.4$  Hz, 1H), 1.60 (s, 4H), 1.54 (s, 6H), 1.37 (s, 3H), 1.36 (s, 3H).

**$^{13}C$  NMR** (126 MHz,  $CDCl_3$ )  $\delta$  (ppm) 163.1 (d,  $J = 245.6$  Hz), 158.0, 157.6, 156.9, 155.7, 143.1 (d,  $J = 7.3$  Hz), 142.9 (d,  $J = 7.2$  Hz), 136.7, 136.4, 133.6, 133.1, 132.6, 132.4, 130.0 (d,  $J = 8.3$  Hz), 130.0 (d,  $J = 8.4$  Hz), 128.3, 128.1, 127.3, 127.3, 126.2, 126.1, 124.4 (d,  $J = 2.7$  Hz), 124.4 (d,  $J = 2.7$  Hz), 115.6 (d,  $J = 20.9$  Hz), 113.0 (d,  $J = 21.1$  Hz), 81.1, 81.0, 80.8, 80.3, 67.7, 67.4, 60.5, 60.4, 58.8, 58.5, 55.8, 55.6, 54.5, 53.7, 40.4, 40.0, 38.2, 38.1, 33.8, 33.5, 28.8, 28.6, 28.2, 28.1.

**$^{19}F$  NMR** (471 MHz,  $CDCl_3$ )  $\delta$  (ppm) –113.6.

**HRMS** (ESI+-Orbitrap)  $m/z$ :  $[M+H]^+$  Calcd for  $C_{30}H_{40}N_3O_4BrF$  604.2181, found 604.2174.

- *di-tert-Butyl 1-(2-bromobenzyl)-3-(3,4-dimethoxyphenethyl)-3,6,7-triazabicyclo[3.2.1]octane-6,7-dicarboxylate (5d)*

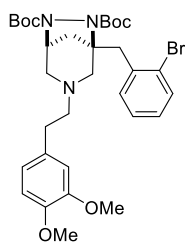

$C_{32}H_{44}BrN_3O_6$

646.6 g/mol

Product **5d** was synthesized according to the general procedure A using Silica (1.4 g),  $NaIO_4$  (200 mg, 0.93 mmol, 1.4 eq.), compound **3** (333 mg, 0.67 mmol, 1.0 eq.), 3,4-dimethoxyphenethylamine (0.12 mL, 0.73 mmol, 1.1 eq.), tetrabutylammonium borohydride (515 mg, 2.00 mmol, 3.0 eq.), AcOH (0.1 mL, 1.20 mmol, 1.8 eq.), and DCM (25 mL, 2 mL). Flash chromatography over silica gel (eluent: cyclohexane/EtOAc, 9/1 to 8/2) afforded the title compound (264 mg, 0.40 mmol, 61 %) as a white amorphous solid.

$^1H$  NMR (500 MHz,  $CDCl_3$ )  $\delta$  (ppm) 7.54 – 7.48 (m, 1H), 7.48 – 7.43 (m, 1H), 7.25 – 7.22 (m, 1H), 7.07 (ddd,  $J = 9.4, 8.7, 1.7$  Hz, 1H), 6.79 (dd,  $J = 6.6, 3.0$  Hz, 1H), 6.69 (ddd,  $J = 7.6, 4.6, 1.7$  Hz, 2H), 4.32 (s, 1H), 3.89 – 3.83 (m, 6H), 3.78 (d,  $J = 14.1$  Hz, 0.7H), 3.67 – 3.57 (m, 1H), 3.45 (d,  $J = 9.3$  Hz, 0.3H), 3.27 – 3.14 (m, 2H), 2.79 – 2.58 (m, 4H), 2.35 – 2.16 (m, 2H), 1.69 (d,  $J = 11.3$  Hz, 1H), 1.62 – 1.51 (m, 10H), 1.36 (d,  $J = 7.1$  Hz, 9H).

$^{13}C$  NMR (126 MHz,  $CDCl_3$ )  $\delta$  (ppm) 169.9, 158.0, 157.6, 156.8, 155.7, 149.0, 147.4, 136.6, 136.4, 133.6, 133.2, 133.1, 132.5, 132.4, 128.3, 128.1, 127.3, 127.3, 126.1, 120.6, 112.1, 112.0, 111.4, 81.1, 80.9, 80.8, 80.3, 79.3, 67.8, 67.3, 60.3, 59.4, 59.0, 58.5, 56.1, 56.0, 55.5, 54.4, 53.7, 40.4, 39.9, 38.1, 38.0, 33.8, 33.3, 28.7, 28.6, 28.2, 28.1.

HRMS (ESI+-Orbitrap)  $m/z$ :  $[M+H]^+$  Calcd for  $C_{32}H_{45}N_3O_6Br$  646.2486, found 646.2472.

- *di-tert-Butyl 1-(2-bromobenzyl)-3-(2-cyclohexylethyl)-3,6,7-triazabicyclo[3.2.1]octane-6,7-dicarboxylate (5e)*

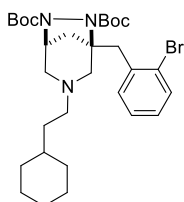

$C_{30}H_{46}N_3O_4Br$

591.6 g/mol

Product **5e** was synthesized according to the general procedure A using Silica (4.2 g),  $NaIO_4$  (0.6 g, 2.80 mmol, 1.4 eq.), compound **3** (1.0 g, 2.00 mmol, 1.0 eq.), 2-cyclohexyl-ethylamine (0.31 mL, 2.20 mmol, 1.1 eq.), *tetra*-butylammonium borohydride (1.6 g, 6.00 mmol, 3.0 eq.), AcOH (0.21 mL, 3.60 mmol, 1.8 eq.), and DCM (66 mL, 6 mL). Flash chromatography over silica gel (eluent: cyclohexane/EtOAc, 9/1 to 8/2) afforded the title compound (490 mg, 0.83 mmol, 41 %) as a white amorphous solid.

$^1H$  NMR (500 MHz,  $CDCl_3$ )  $\delta$  (ppm) 7.53 – 7.48 (m, 1H), 7.47 – 7.43 (m, 1H), 7.26 – 7.20 (m, 1H), 7.10 – 7.04 (m, 1H), 4.28 (d,  $J = 3.5$  Hz, 1H), 3.76 (d,  $J = 14.1$  Hz, 0.7H), 3.61 – 3.50 (m, 1H), 3.35 (dd,  $J = 10.5, 1.5$  Hz, 0.3H), 3.25 – 3.14 (m, 1.3H), 3.08 (dd,  $J = 10.9, 3.1$  Hz, 0.7H), 2.48 – 2.34 (m, 2H), 2.19 – 2.02 (m, 2H), 1.71 – 1.45 (m, 15H), 1.39 – 1.30 (m, 11H), 1.25 – 1.12 (m, 4H), 0.94 – 0.81 (dd,  $J = 22.3, 11.0$  Hz, 2H).

$^{13}C$  NMR (126 MHz,  $CDCl_3$ )  $\delta$  (ppm) 158.0, 157.6, 157.0, 155.6, 136.8, 136.5, 133.6, 133.1, 132.5, 132.3, 128.2, 128.0, 127.3, 127.2, 126.2, 126.1, 80.9, 80.8, 80.7, 80.2, 67.8, 67.3, 60.5, 58.8, 56.0, 55.7, 55.2, 55.0, 54.5, 53.8, 40.5, 40.0, 38.2, 38.0, 36.5, 36.2, 34.7, 34.6, 33.7, 33.7, 33.6, 33.6, 28.7, 28.6, 28.2, 28.1, 27.1, 26.7, 26.4.

HRMS (ESI+-Orbitrap)  $m/z$ :  $[M+H]^+$  Calcd for  $C_{30}H_{47}N_3O_4Br$  579.2540, found 592.2744.



- *di-tert-Butyl 1-(2-bromobenzyl)-3-(4-hydroxybutyl)-3,6,7-triazabicyclo[3.2.1]octane-6,7-dicarboxylate (5f)*

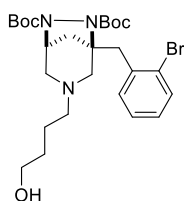

$C_{26}H_{40}BrN_3O_5$   
554.5 g/mol

Product **5f** was synthesized according to the general procedure B using Silica (1.5 g),  $NaIO_4$  (210 mg, 0.98 mmol, 1.4 eq.), compound **3** (350 mg, 0.70 mmol, 1.0 eq.), butanolamine (0.07 mL, 0.77 mmol, 1.1 eq.), *tetra*-butylammonium borohydride (541 mg, 2.10 mmol, 3.0 eq.), AcOH (0.1 mL, 1.26 mmol, 1.8 eq.), and DCM (25 mL, 2 mL). Flash chromatography over silica gel (eluent: cyclohexane/EtOAc, 7/3) afforded the title compound (304 mg, 0.55 mmol, 78 %) as a white amorphous solid.

$^1H$  NMR (500 MHz,  $CDCl_3$ )  $\delta$  (ppm) 7.54 – 7.47 (m, 1H), 7.44 (m, 1H), 7.25 – 7.21 (m, 1H), 7.10 – 7.03 (m, 1H), 4.29 (s, 1H), 3.77 (d,  $J = 14.1$  Hz, 0.7H), 3.65 – 3.54 (m, 3H), 3.33 – 3.07 (m, 4.3H), 2.47 – 2.41 (m, 2H), 2.16 (m, 1H), 2.11 – 2.03 (m, 1H), 1.68 – 1.63 (m, 3H), 1.59 – 1.51 (m, 12H), 1.34 (d,  $J = 6.0$  Hz, 9H).

$^{13}C$  NMR (126 MHz,  $CDCl_3$ )  $\delta$  (ppm) 157.8, 155.8, 136.7, 136.4, 133.5, 133.0, 132.5, 132.4, 128.3, 128.1, 127.3, 126.2, 126.1, 81.2, 80.9, 80.9, 80.5, 67.6, 67.5, 63.0, 62.9, 61.2, 60.6, 58.7, 56.9, 56.7, 55.5, 55.1, 54.6, 53.6, 40.4, 40.1, 38.2, 38.0, 30.6, 30.4, 28.8, 28.6, 28.2, 28.1, 23.2, 23.1.

HRMS (ESI+-Orbitrap)  $m/z$ :  $[M+H]^+$  Calcd for  $C_{30}H_{41}N_3O_5Br$  554.2224, found 554.2211.

- *di-tert-Butyl 1-(2-bromobenzyl)-3-(2-(pyrrolidin-1-yl)ethyl)-3,6,7-triazabicyclo[3.2.1]octane-6,7-dicarboxylate (5g)*

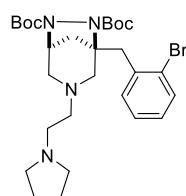

$C_{28}H_{43}BrN_4O_4$   
579.6 g/mol

Product **5g** was synthesized according to the general procedure A using Silica (4.2 g),  $NaIO_4$  (0.6 g, 2.80 mmol, 1.4 eq.), compound **3** (1.0 g, 2.00 mmol, 1.0 eq.), *N*-(2-aminoethyl)pyrrolidine (0.28 mL, 2.20 mmol, 1.1 eq.), *tetra*butylammonium borohydride (1.55 g, 6.00 mmol, 3.0 eq.), AcOH (0.21 mL, 3.6 mmol, 1.8 eq.), and DCM (66 mL, 8 mL). Flash chromatography over silica gel (eluent: cyclohexane/EtOAc, 8/2 to 7/3) afforded the title compound (499 mg, 0.86 mmol, 43 %) as a white amorphous solid.

$^1H$  NMR (500 MHz,  $CDCl_3$ )  $\delta$  (ppm) 7.51 (t,  $J = 8.7$  Hz, 1H), 7.45 – 7.39 (m, 1H), 7.26 – 7.22 (m, 1H), 7.12 – 7.05 (m, 1H), 4.30 (d,  $J = 3.5$  Hz, 1H) 3.74 (d,  $J = 14.1$  Hz, 0.6H), 3.58 (d,  $J = 13.5$  Hz, 1H), 3.40 – 3.05 (m, 4.7H), 2.98 – 2.85 (m, 3.2H), 2.81 – 2.62 (m, 2.4H), 2.37 – 2.29 (m, 1H), 2.28 – 2.09 (m, 3.3H), 1.92 – 1.83 (m, 2H), 1.68 (d,  $J = 11.3$  Hz, 1.3H), 1.60 (s, 4.5H), 1.57 – 1.48 (m, 6H), 1.35 (d,  $J = 5.1$  Hz, 9H).

$^{13}C$  NMR (126 MHz,  $CDCl_3$ )  $\delta$  (ppm) 169.9, 157.7, 157.5, 156.9, 155.6, 136.4, 136.2, 133.5, 133.0, 132.6, 132.5, 128.3, 128.2, 127.3, 126.2, 126.1, 81.3, 81.1, 81.0, 80.4, 79.3, 67.4, 67.4, 62.4, 62.3, 61.8, 61.7, 61.4, 61.3, 58.6, 56.4, 56.0, 54.6, 53.6, 52.6, 52.1, 40.3, 40.0, 38.1, 37.9, 28.7, 28.6, 28.2, 28.1, 22.9, 22.8, 22.8, 22.7.

HRMS (ESI+-Orbitrap)  $m/z$ :  $[M+H]^+$  Calcd for  $C_{28}H_{44}N_4O_4Br$  579.2540, found 579.2521.

- *di-tert-Butyl 1-(2-bromobenzyl)-3-isopropyl-3,6,7-triazabicyclo[3.2.1]octane-6,7-dicarboxylate (5h)*

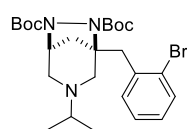

$C_{25}H_{38}BrN_3O_4$   
524.5 g/mol

Product **5h** was synthesized according to the general procedure A using Silica (2.5 g),  $NaIO_4$  (360 mg, 1.68 mmol, 1.4 eq.), compound **3** (600 mg, 1.20 mmol, 1.0 eq.), isopropyl amine (0.11 mL, 1.32 mmol, 1.1 eq.), tetrabutylammonium borohydride (927 mg, 3.60 mmol, 3.0 eq.), AcOH (0.12 mL, 2.10 mmol, 1.8 eq.), and DCM (40 mL, 4 mL). Flash chromatography over silica gel (eluent: cyclohexane/EtOAc, 95/5 to 9/1) afforded the title compound (269 mg, 0.51 mmol, 43 %) as a white amorphous solid.

$^1H$  NMR (500 MHz,  $CDCl_3$ )  $\delta$  (ppm) 7.53 – 7.42 (m, 2H), 7.26 – 7.21 (m, 1H), 7.10 – 7.03 (m, 1H), 4.30 (t,  $J = 3.6$  Hz, 1H), 3.78 (d,  $J = 14.1$  Hz, 0.7H), 3.59 (d,  $J = 14.2$  Hz, 0.3H), 3.48 (d,  $J = 10.4$ , 0.7H), 3.27 – 3.14 (m, 1.3H), 3.06 – 3.00 (dd,  $J = 10.7$ , 3.5 Hz, 1H), 2.86 – 2.73 (m, 1H), 2.41 (d,  $J = 10.8$  Hz, 0.3H), 2.36 – 2.28 (m, 1H), 2.24 – 2.15 (m, 0.7H), 1.66 – 1.61 (m, 1H), 1.61 – 1.57 (m, 3H), 1.53 (s, 6H), 1.51 – 1.41 (m, 1H), 1.33 – 1.38 (m, 9H), 1.06 – 0.98 (m, 6H).

$^{13}C$  NMR (126 MHz,  $CDCl_3$ )  $\delta$  (ppm) 157.9, 157.8, 155.6, 136.8, 136.6, 133.6, 133.1, 132.5, 132.3, 128.2, 128.0, 127.3, 127.2, 126.2, 126.1, 81.0, 80.8, 80.7, 80.2, 67.9, 67.5, 55.7, 54.9, 54.6, 53.8, 53.4, 53.2, 40.5, 40.1, 38.3, 38.0, 28.7, 28.6, 28.2, 28.1, 27.1, 19.3, 18.3, 18.1, 18.0.

HRMS (ESI+-Orbitrap)  $m/z$ :  $[M+H]^+$  Calcd for  $C_{25}H_{39}N_3O_4Br$  524.2118, found 254.2107.

#### General procedure B: Deprotection and intramolecular Buchwald – Hartwig N-arylation

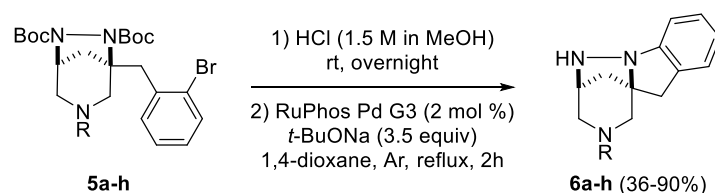

Substrate **5a-h** (1.0 eq) were dissolved in a 1.5 M solution of HCl in methanol. The resulting mixture was stirred overnight at r.t., and then concentrated under reduced pressure. The residue was dissolved in 1,4-dioxane (0.04 M).  $NaO^tBu$  (3.5 eq.) and RuPhos Pd G3 (0.02 eq.) were added, and the resulting solution was stirred for 2h at reflux. The reaction mixture was then cooled back to r.t. and filtered through a pad of Celite® (eluent: DCM/MeOH, 8/2). The filtrate was collected and concentrated *in vacuo*. Flash chromatography over silica gel (eluent: pentane/EtOAc, 9/1 to 8/2) finally afforded products **6a-h**.

- *4-(4-Methoxybenzyl)-2,3,4,5-tetrahydro-1H,6H-2,5a-methano[1,2,5]triazepino[1,7-a]indole (6a)*

Product **6a** was synthesized according to the general procedure B using HCl (1.5 M, 5 mL), compound **5a** (311 mg, 0.52 mmol, 1.0 eq.), 1,4-dioxane (13 mL),  $NaO^tBu$  (175 mg, 1.82 mmol, 3.5 eq.), and RuPhos Pd G3 (9 mg, 0.01 mmol, 0.02 eq.). Flash chromatography over silica gel (eluent: pentane/EtOAc, 8/2) afforded the title compound (139 mg, 0.43 mmol, 83 %) as a colorless oil.

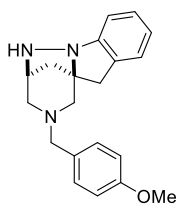

$C_{20}H_{23}N_3O$   
321.4 g/mol

$^1H$  NMR (500 MHz,  $CDCl_3$ )  $\delta$  7.52 (dd,  $J = 8.0, 0.9$  Hz, 1H), 7.46 (dd,  $J = 7.7, 1.6$  Hz, 1H), 7.25 – 7.20 (m, 1H), 7.12 (d,  $J = 8.5$  Hz, 2H), 7.07 (td,  $J = 7.8, 1.6$  Hz, 1H), 6.84 – 6.80 (m, 2H), 4.94 – 4.89 (m, 1H), 3.82 – 3.77 (m, 4H), 3.50 – 3.45 (m, 3H), 2.92 (dd,  $J = 11.0, 3.6$  Hz, 1H), 2.85 (dd,  $J = 11.1, 1.9$  Hz, 1H), 2.07 (dd,  $J = 11.0, 1.0$  Hz, 1H), 1.95 (d,  $J = 11.2$  Hz, 1H), 1.36 (ddd,  $J = 9.6, 4.9, 3.0$  Hz, 1H), 1.27 – 1.23 (m, 1H).

$^{13}C$  NMR (126 MHz,  $CDCl_3$ )  $\delta$  158.9, 136.4, 132.8, 132.7, 130.1, 129.4, 128.5, 127.7, 125.7, 113.8, 85.2, 78.2, 60.0, 55.4, 53.9, 48.3, 39.4, 38.2.

HRMS (ESI+-Orbitrap)  $m/z$ :  $[M+H]^+$  Calcd for  $C_{20}H_{24}N_3O$  322.1914, found 322.1905.

- 4-(Naphthalen-1-ylmethyl)-2,3,4,5-tetrahydro-1H,6H-2,5a-methano[1,2,5]triazepino[1,7-a]indole (**6b**)

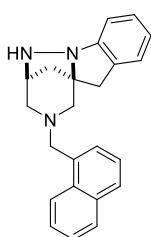

$C_{23}H_{23}N_3$   
341.5 g/mol

Product **6b** was synthesized according to the general procedure B using HCl (1.5 M, 5 mL), compound **5b** (300 mg, 0.48 mmol, 1.0 eq.), 1,4-dioxane (12 mL),  $NaO^tBu$  (162 mg, 1.68 mmol, 3.5 eq.), and RuPhos Pd G3 (8 mg, 0.01 mmol, 0.02 eq.). Flash chromatography over silica gel (eluent: pentane/EtOAc, 9/1 to 8/2 to DCM/MeOH 10/0 to 9/1) afforded the title compound (106 mg, 0.31 mmol, 65 %) as a white amorphous.

$^1H$  NMR (500 MHz,  $CDCl_3$ )  $\delta$  (ppm) 8.08 (d,  $J = 8.2$  Hz, 1H), 7.82 (d,  $J = 8.9$  Hz, 1H), 7.76 (d,  $J = 7.7$  Hz, 1H), 7.54 – 7.41 (m, 4H), 7.40 – 7.33 (m, 2H), 7.20 (d,  $J = 7.4$  Hz, 1H), 7.06 (td,  $J = 7.6, 1.4$  Hz, 1H), 4.90 (t,  $J = 4.6$  Hz, 1H), 3.96 (s, 2H), 3.78 (d,  $J = 14.2$  Hz, 1H), 3.48 (d,  $J = 14.2$  Hz, 1H), 2.97 (dd,  $J = 11.2, 3.6$  Hz, 1H), 2.92 (dd,  $J = 11.1, 1.7$  Hz, 1H), 2.18 (d,  $J = 11.1$  Hz, 1H), 2.05 (d,  $J = 11.3$  Hz, 1H), 1.38 (dd,  $J = 11.4, 5.5$  Hz, 1H), 1.32 (d,  $J = 11.4$  Hz, 1H).

$^{13}C$  NMR (126 MHz,  $CDCl_3$ )  $\delta$  (ppm) 136.4, 133.9, 133.1, 132.8, 132.7, 132.5, 128.5, 128.4, 128.3, 127.7, 127.2, 126.2, 125.9, 125.7, 125.2, 124.5, 85.2, 78.1, 59.1, 54.4, 48.7, 39.4, 38.1.

HRMS (ESI+-Orbitrap)  $m/z$ :  $[M+H]^+$  Calcd for  $C_{23}H_{24}N_3$  342.1965, found 342.1956.

Note: A diazo derivative (50 mg, 0.12 mmol, 25 %) arising from the oxidation of hydrazine **5b** was isolated as a by-product after the reaction.

- 4-(3-Fluorophenethyl)-2,3,4,5-tetrahydro-1H,6H-2,5a-methano[1,2,5]triazepino[1,7-a]indole (**6c**)

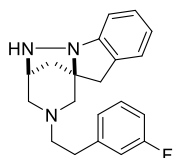

$C_{20}H_{22}FN_3$   
323.4 g/mol

Product **6c** was synthesized according to the general procedure B using HCl (1.5 M, 2 mL), compound **5c** (500 mg, 0.83 mmol, 1.0 eq.), 1,4-dioxane (20 mL),  $NaO^tBu$  (275 mg, 2.86 mmol, 3.5 eq.), and RuPhos Pd G3 (14 mg, 0.02 mmol, 0.02 eq.). Flash chromatography over silica gel (eluent: pentane/EtOAc, 9/1 to 8/2) afforded the desired product (230 mg, 0.71 mmol, 87 %) as a colorless oil.

$^1H$  NMR (500 MHz,  $CDCl_3$ )  $\delta$  (ppm) 7.54 (dd,  $J = 8.0, 1.0$  Hz, 1H), 7.49 (dt,  $J = 8.1, 4.1$  Hz, 1H), 7.25 – 7.17 (m, 2H), 7.09 (td,  $J = 7.8, 1.7$  Hz, 1H), 6.92 – 6.82 (m, 3H), 4.97 (dd,  $J = 10.5, 5.9$  Hz, 1H), 3.81 (d,  $J = 14.2$  Hz, 1H), 3.54 (d,  $J = 14.0$  Hz, 1H), 3.07 – 2.99 (m, 1H), 2.94 (dd,  $J = 11.0, 1.9$  Hz, 1H), 2.72 – 2.62 (m, 2H), 2.64 – 2.54 (m, 2H), 2.12 (dd,  $J = 11.0, 1.1$  Hz, 1H), 2.06 – 2.01 (m, 1H), 1.41 (ddd,  $J = 21.4, 10.7, 6.6$  Hz, 1H), 1.32 – 1.21 (m, 1H).

**<sup>13</sup>C NMR** (126 MHz, CDCl<sub>3</sub>) δ (ppm) 163.0 (d, *J* = 245.4 Hz), 142.8 (d, *J* = 7.2 Hz), 136.4, 132.9, 132.7, 129.9 (d, *J* = 8.3 Hz), 128.6, 127.7, 125.7, 124.4, 115.6 (d, *J* = 20.9 Hz), 113.1 (d, *J* = 21.0 Hz), 85.2, 78.1, 58.0, 54.0, 48.5, 39.5, 38.2, 33.0.

**<sup>19</sup>F NMR** (471 MHz, CDCl<sub>3</sub>) δ (ppm) –113.7 (dd, *J* = 15.2, 9.1 Hz).

**HRMS** (ESI+-Orbitrap) *m/z*: [M+H]<sup>+</sup> Calcd for C<sub>20</sub>H<sub>23</sub>N<sub>3</sub>F 324.1871, found 324.1862.

- 4-(4-Methoxyphenethyl)-2,3,4,5-tetrahydro-1*H*,6*H*-2,5*a*-methano[1,2,5]triazepino[1,7-*a*]indole (**6d**)

Product **6d** was synthesized according to the general procedure B using HCl (1.5 M, 5 mL), compound **5d** (300 mg, 0.46 mmol, 1.0 eq.), 1,4-dioxane (10 mL), NaO<sup>t</sup>Bu (148 mg, 1.54 mmol, 3.5 eq.), and RuPhos Pd G3 (7 mg, 0.01 mmol, 0.02 eq.). Flash chromatography over silica gel (eluent: pentane/EtOAc, 9/1 to 8/2 to DCM/MeOH 10/0 to 9/1) afforded the title compound (110 mg, 0.35 mmol, 76 %) as a white amorphous solid.

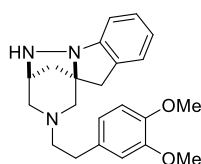

C<sub>22</sub>H<sub>27</sub>N<sub>3</sub>O<sub>2</sub>  
365.5 g/mol

**<sup>1</sup>H NMR** (500 MHz, CD<sub>3</sub>OD) δ (ppm) 7.57 (dd, *J* = 8.0, 1.2 Hz, 1H), 7.47 (dd, *J* = 7.7, 1.7 Hz, 1H), 7.31 – 7.26 (m, 1H), 7.14 (td, *J* = 7.8, 1.7 Hz, 1H), 6.81 (d, *J* = 8.2 Hz, 1H), 6.78 (t, *J* = 2.6 Hz, 1H), 6.68 (dd, *J* = 8.1, 2.0 Hz, 1H), 4.96 (t, *J* = 4.4 Hz, 1H), 3.80 (s, 3H), 3.78 (s, 3H), 3.74 (d, *J* = 14.2 Hz, 1H), 3.56 (d, *J* = 14.2 Hz, 1H), 2.98 (dd, *J* = 10.9, 3.5 Hz, 1H), 2.92 (dd, *J* = 11.2, 1.8 Hz, 1H), 2.65 – 2.54 (m, 4H), 2.16 – 2.11 (m, 1H), 2.08 (d, *J* = 11.3 Hz, 1H), 1.47 – 1.41 (m, 1H), 1.39 (d, *J* = 11.5 Hz, 1H).

**<sup>13</sup>C NMR** (126 MHz, CD<sub>3</sub>OD) δ (ppm) 150.3, 148.8, 137.6, 134.6, 134.0, 133.7, 129.8, 128.6, 126.6, 121.9, 113.8, 113.0, 86.5, 79.4, 59.4, 56.5, 56.4, 54.7, 49.2, 40.3, 39.3, 33.2.

**HRMS** (ESI+-Orbitrap) *m/z*: [M+H]<sup>+</sup> Calcd for C<sub>22</sub>H<sub>28</sub>N<sub>3</sub>O<sub>2</sub> 366.2176, found 366.2165.

**Note:** A diazo derivative (40 mg, 0.09 mmol, 20 %) arising from the oxidation of hydrazine **5d** was isolated as a by-product after the reaction.

- 4-(2-Cyclohexylethyl)-2,3,4,5-tetrahydro-1*H*,6*H*-2,5*a*-methano[1,2,5]triazepino[1,7-*a*]indole (**6e**)

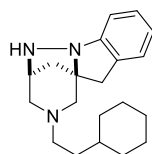

C<sub>20</sub>H<sub>29</sub>N<sub>3</sub>  
311.5 g/mol

Product **6e** was synthesized according to the general procedure B using HCl (1.5 M, 5 mL), compound **5e** (189 mg, 0.32 mmol, 1.0 eq.), 1,4-dioxane (8 mL), NaO<sup>t</sup>Bu (107 mg, 1.12 mmol, 3.5 eq.), and RuPhos Pd G3 (5 mg, 0.01 mmol, 0.02 eq.). Flash chromatography over silica gel (eluent: pentane/EtOAc, 9/1 to 7/3) afforded the title compound (73 mg, 0.23 mmol, 73 %) as a white amorphous solid.

**<sup>1</sup>H NMR** (500 MHz, CDCl<sub>3</sub>) δ 7.53 (dd, *J* = 8.0, 1.1 Hz, 1H), 7.48 (dd, *J* = 7.7, 1.6 Hz, 1H), 7.25 – 7.21 (m, 1H), 7.07 (td, *J* = 7.8, 1.7 Hz, 1H), 4.92 (t, *J* = 4.6 Hz, 1H), 3.81 (d, *J* = 14.2 Hz, 1H), 3.52 (d, *J* = 14.2 Hz, 1H), 2.97 (dd, *J* = 11.1, 3.9 Hz, 1H), 2.88 (dd, *J* = 11.1, 2.0 Hz, 1H), 2.36 (dd, *J* = 8.7, 6.8 Hz, 2H), 2.00 (dd, *J* = 11.0, 1.1 Hz, 1H), 1.89 (d, *J* = 11.2 Hz, 1H), 1.69 – 1.58 (m, 4H), 1.40 – 1.34 (m, 1H), 1.30 – 1.07 (m, 8H), 0.82 – 0.76 (m 2H).

**<sup>13</sup>C NMR** (126 MHz, CDCl<sub>3</sub>) δ 136.5, 132.8, 132.7, 128.5, 127.7, 125.7, 85.2, 78.2, 54.5, 54.3, 48.6, 39.5, 38.3, 35.9, 33.9, 33.5, 26.7, 26.4.

**HRMS** (ESI+-Orbitrap)  $m/z$ :  $[M+H]^+$  Calcd for  $C_{20}H_{30}N_3$  312.2434, found 312.2418.

- 4-(2,3-Dihydro-1H,6H-2,5a-methano[1,2,5]triazepino[1,7-a]indol-4(5H)-yl)butan-1-ol (**6f**)

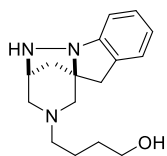

Product **6f** was synthesized according to the general procedure B using HCl (1.5 M, 6), compound **5f** (151 mg, 0.27 mmol, 1.0 eq.), 1,4-dioxane (7 mL), NaO<sup>t</sup>Bu (89 mg, 0.93 mmol, 3.5 eq.), and RuPhos Pd G3 (5 mg, 0.01 mmol, 0.02 eq.). Flash chromatography over silica gel (eluent: DCM/MeOH, 100/0 to 92/8) afforded the title compound (36 mg, 0.13 mmol, 50 %) as a colorless oil.

$C_{16}H_{23}N_3O$

273.4 g/mol

$^1H$  NMR (500 MHz,  $CDCl_3$ )  $\delta$  (ppm) 7.52 (dd,  $J = 8.0, 0.9$  Hz, 1H), 7.49 (dd,  $J = 7.7, 1.5$  Hz, 1H), 7.25 - 7.20 (m, 1H) 7.08 (td,  $J = 7.8, 1.6$  Hz, 1H), 4.99 - 4.94 (m, 1H), 3.83 (d,  $J = 14.2$  Hz, 3H), 3.06 - 2.99 (m, 1H), 2.93 (dd,  $J = 11.2, 1.9$  Hz, 1H), 2.44 - 2.35 (m, 2H), 2.03 (d,  $J = 11.1$  Hz, 1H), 1.94 - 1.86 (m, 1H), 1.58 - 1.45 (m, 4H), 1.39 (dd,  $J = 11.5, 5.6$  Hz, 1H), 1.29 (d,  $J = 11.5$  Hz, 1H).

$^{13}C$  NMR (126 MHz,  $CDCl_3$ )  $\delta$  (ppm) 136.4, 132.8 (2C), 130.2, 128.5, 125.7, 85.2, 78.0, 62.7, 56.7, 54.2, 48.6, 39.4, 38.1, 31.4, 23.7.

**HRMS** (ESI+-Orbitrap)  $m/z$ :  $[M+H]^+$  Calcd for  $C_{16}H_{24}N_3O$  274.1914, found 274.1906.

An inseparable diazo derivative **6'f** (22 mg, 0.06 mmol, 23%) arising from the oxidation of hydrazine **5f** was also obtained as a by-product after the reaction.

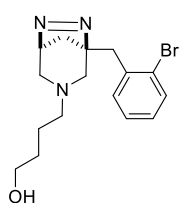

$^1H$  NMR (500 MHz,  $CDCl_3$ )  $\delta$  7.31 - 7.20 (m, 4H), 4.99 - 4.94 (m, 1H), 3.59 - 3.50 (m, 3H), 3.29 (d,  $J = 13.9$  Hz, 1H), 3.06 - 2.99 (m, 1H), 2.87 (dd,  $J = 11.3, 1.9$  Hz, 1H), 2.44 - 2.35 (m, 2H), 1.94 - 1.86 (m, 2H), 1.58 - 1.45 (m, 5H), 1.13 (d,  $J = 11.3$  Hz, 1H).

$^{13}C$  NMR (126 MHz,  $CDCl_3$ )  $\delta$  (ppm) 136.2, 129.0, 127.7, 126.8, 85.4, 77.8, 62.7, 56.7, 54.1, 48.6, 40.9, 38.5, 31.4, 23.7.

$C_{16}H_{22}N_3O$

352.3 g/mol

**HRMS** (ESI+-Orbitrap)  $m/z$  :  $[M+H]^+$  Calcd for  $C_{16}H_{23}N_3OBr$  352.1019, found 352.1008.

- 4-(2-(Pyrrolidin-1-yl)ethyl)-2,3,4,5-tetrahydro-1H,6H-2,5a-methano[1,2,5]triazepino[1,7-a]indole (**6g**)

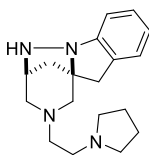

Product **6g** was synthesized according to the general procedure B using HCl (1.5 M, 5 mL), compound **5g** (211 mg, 0.36 mmol, 1.0 eq.), 1,4-dioxane (9 mL), NaO<sup>t</sup>Bu (121 mg, 1.26 mmol, 3.5 eq.), and RuPhos Pd G3 (6 mg, 0.01 mmol, 0.02 eq.). Flash chromatography over silica gel (DCM/MeOH/ $NH_4OH$ , 95/5/0 to 90/5/5) afforded the title compound (139 mg, 0.13 mmol, 36 %) as a colorless oil.

$C_{18}H_{26}N_4$

298.7 g/mol

$^1H$  NMR (500 MHz,  $CDCl_3$ )  $\delta$  (ppm) 7.54 (dd,  $J = 8.0, 1.0$  Hz, 1H), 7.44 (dd,  $J = 7.7, 1.6$  Hz, 1H), 7.24 (td,  $J = 7.6, 1.1$  Hz, 1H), 7.10 (td,  $J = 7.8, 1.7$  Hz, 1H), 5.01 - 4.94 (m, 1H), 3.82 (d,  $J = 14.2$  Hz, 1H), 3.74 (s, 1H) 3.54 (d,  $J = 14.2$  Hz, 1H), 3.12 - 2.94 (m, 7H), 2.22 - 2.16 (m, 1H), 2.13 - 2.02 (m, 6H), 1.41 (dd,  $J = 11.7, 5.7$  Hz, 2H), 1.33 (d,  $J = 11.7$  Hz, 2H).

$^{13}\text{C}$  NMR (126 MHz,  $\text{CDCl}_3$ )  $\delta$  (ppm) 135.9, 133.0, 132.6, 128.8, 127.8, 125.7, 85.4, 78.0, 54.7, 54.0, 52.0, 51.8, 48.5, 39.3, 37.9, 23.3.

HRMS (ESI+-Orbitrap)  $m/z$ :  $[\text{M}+\text{H}]^+$  Calcd for  $\text{C}_{18}\text{H}_{27}\text{N}_4$  299.2230, found 299.2214.

- 4-Isopropyl-2,3,4,5-tetrahydro-1H,6H-2,5a-methano[1,2,5]triazepino[1,7-a]indole (**6h**)

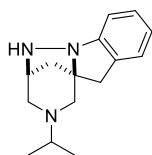

Product **6h** was synthesized according to the general procedure B using HCl (1.5 M, 12 mL), compound **5h** (311 mg, 0.59 mmol, 1.0 eq.), 1,4-dioxane (15 mL),  $\text{NaO}^t\text{Bu}$  (199 mg, 2.1 mmol, 3.5 eq.), and RuPhos Pd G3 (10 mg, 0.01 mmol, 0.02 eq.). Flash chromatography over silica gel (Pentane/EtOAc, 85/15 to 7/3) afforded the title compound (129 mg, 0.53 mmol, 90 %) as a white amorphous solid.

$\text{C}_{15}\text{H}_{21}\text{N}_3$   
243.4 g/mol

$^1\text{H}$  NMR (500 MHz,  $\text{CDCl}_3$ )  $\delta$  (ppm) 7.53 (dd,  $J = 8.0, 1.1$  Hz, 1H), 7.48 (dd,  $J = 7.7, 1.6$  Hz, 1H), 7.25 – 7.20 (m, 1H), 7.10 – 7.04 (m, 1H), 4.92 (t,  $J = 4.4$  Hz, 1H), 3.81 (d,  $J = 14.1$  Hz, 1H), 3.51 (d,  $J = 14.2$  Hz, 1H), 2.94 – 2.87 (m, 1H), 2.81 (dd,  $J = 10.9, 2.0$  Hz, 1H), 2.73 – 2.63 (m, 1H), 2.19 (dd,  $J = 10.9, 1.6$  Hz, 1H), 2.12 – 2.07 (m, 1H), 1.39 – 1.30 (m, 1H), 1.30 – 1.19 (m, 1H), 1.00 – 0.91 (m, 6H).

$^{13}\text{C}$  NMR (126 MHz,  $\text{CDCl}_3$ )  $\delta$  (ppm) 136.6, 132.8, 132.8, 128.5, 127.7 (2C), 85.1, 78.1, 52.9, 50.2, 44.1, 39.6, 38.2, 18.5, 18.2.

HRMS (ESI+-Orbitrap)  $m/z$ :  $[\text{M}+\text{H}]^+$  Calcd for  $\text{C}_{15}\text{H}_{22}\text{N}_3$  244.1808, found 244.1800.

#### General procedure C: Hydrogenolysis and Boc-protection of the free amino groups

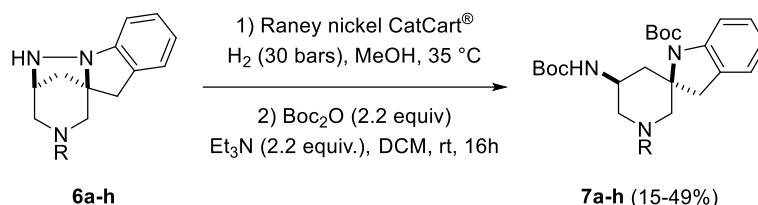

Continuous flow hydrogenolysis was performed using a H-CUBE<sup>®</sup> reactor. Substrates **6a-h** (1.0 eq.) were dissolved in methanol (0.0025M). The resulting solutions were eluted through the reactor which was equipped with Raney nickel CatCart<sup>®</sup> (flow rate: 1 mL/min). The reactions were performed under a  $\text{H}_2$  atmosphere (30 bars) at 35 °C. After the hydrogenolysis, the solutions were concentrated. The resulting residues were dissolved in DCM.  $\text{Boc}_2\text{O}$  (2.2 eq.) was added followed by triethylamine (2.2 eq.). The resulting mixtures were stirred overnight at r.t, and then concentrated under reduced pressure. Flash chromatography over silica gel (eluent: pentane/EtOAc) finally afforded the desired product **7a-h**.

- *tert*-Butyl 5'-((*tert*-butoxycarbonyl)amino)-1'-(4-methoxybenzyl)spiro[indoline-2,3'-piperidine]-1-carboxylate (**7a**)

Product **7a** was synthesized according to the general the procedure C using compound **6a** (80 mg, 0.25 mmol, 1.0 eq.), methanol (100 mL), DCM (5 mL),  $\text{Boc}_2\text{O}$  (0.12 mL, 0.55 mmol, 2.2 eq.), and triethylamine (0.08 mL, 0.55 mmol, 2.2 eq.). Flash chromatography over silica gel (eluent: pentane/EtOAc, 9/1 to 8/2) afforded the title compound (45 mg, 0.11 mmol, 45 %) as a white solid.

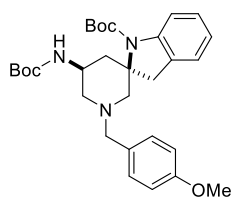

$C_{30}H_{41}N_3O_5$   
523.7 g/mol

$^1H$  NMR (500 MHz,  $CDCl_3$ )  $\delta$  (ppm) 7.54 (d,  $J$  = 7.9 Hz, 1H), 7.22 – 7.13 (m, 4H), 7.10 – 7.04 (m, 1H), 6.84 (d,  $J$  = 8.5 Hz, 2H), 5.16 (s, 1H), 4.86 – 4.84 (br m, 1H), 3.95 (br s, 1H), 3.82 – 3.75 (m, 3H), 3.53 – 3.35 (m, 3H), 3.10 (d,  $J$  = 13.7 Hz, 1H), 2.67 – 2.12 (m, 5H), 1.50 (s, 9H), 1.42 (s, 9H).

$^{13}C$  NMR (126 MHz,  $CDCl_3$ )  $\delta$  (ppm) 159.0, 155.4, 154.6, 136.8, 133.0, 130.5, 129.1, 128.3, 127.2, 126.1, 113.8, 79.4, 79.2, 61.9, 60.9, 57.9, 55.7, 55.4, 45.1, 41.2, 35.7, 28.7, 28.6.

HRMS (ESI+-Orbitrap)  $m/z$ :  $[M+H]^+$  Calcd for  $C_{30}H_{42}N_3O_5$  524.3119, found 524.3110.

- tert-Butyl 5'-((tert-butoxycarbonyl)amino)-1'-(naphthalen-1-ylmethyl)spiro[indoline-2,3'-piperidine]-1-carboxylate (**7b**)

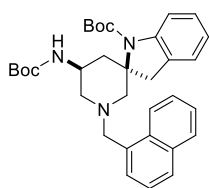

$C_{33}H_{41}N_3O_4$   
543.7 g/mol

Product **7b** was synthesized according to the general procedure C using compound **6b** (58 mg, 0.17 mmol, 1.0 eq.), methanol (69 mL), DCM (5 mL),  $Boc_2O$  (0.08 mL, 0.37 mmol, 2.2 eq.), and triethylamine (0.05 mL, 0.37 mmol, 2.2 eq.). Flash chromatography over silica gel (eluent: pentane/EtOAc, 95/5 to 8/2) afforded the title compound (36 mg, 0.06 mmol, 36 %) as a white solid.

$^1H$  NMR (500 MHz,  $CDCl_3$ )  $\delta$  (ppm) 8.25 (d,  $J$  = 8.2 Hz, 1H), 7.85 (d,  $J$  = 8.1 Hz, 1H), 7.78 (t,  $J$  = 8.8 Hz, 1H), 7.55 – 7.45 (m, 3H), 7.39 – 7.35 (m, 1H), 7.31 (d,  $J$  = 6.7 Hz, 1H), 7.14 – 6.98 (m, 3H), 5.07 (s, 1H), 4.62 (s, 1H), 4.03 – 3.81 (m, 3H), 3.21 (dd,  $J$  = 32.3, 13.7 Hz, 2H), 2.80 – 2.58 (m, 2H), 2.48 – 2.24 (br m, 3H), 1.71 – 1.59 (br s, 1H), 1.45 (s, 9H), 1.34 (s, 9H).

$^{13}C$  NMR (126 MHz,  $CDCl_3$ )  $\delta$  (ppm) 155.4, 154.5, 136.6, 134.2, 133.6, 133.0, 132.4, 130.6, 128.8, 128.5, 128.2, 128.0, 127.1, 126.0, 126.0, 125.8, 125.2, 124.8, 79.2, 79.0, 60.9, 58.4, 55.7, 45.3, 41.3, 35.5, 28.6, 28.5.

HRMS (ESI+-Orbitrap)  $m/z$ :  $[M+H]^+$  Calcd for  $C_{33}H_{42}N_3O_4$  544.3170, found 544.3160.

- tert-Butyl 5'-((tert-butoxycarbonyl)amino)-1'-(3-fluorophenethyl)spiro[indoline-2,3'-piperidine]-1-carboxylate (**7c**)

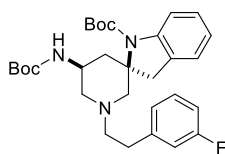

$C_{30}H_{40}FN_3O_4$   
525.7 g/mol

Product **7c** was synthesized according to the general procedure C using compound (100 mg, 0.31 mmol, 1.0 eq.), methanol (120 mL), DCM (1 mL),  $Boc_2O$  (0.15 mL, 0.68 mmol, 2.2 eq.), and triethylamine (0.10 mL, 0.68 mmol, 2.2 eq.). Flash chromatography over silica gel (eluent: pentane/EtOAc, 9/1 to 8/2) afforded the title compound (80 mg, 0.15 mmol, 49 %) as a white solid.

$^1H$  NMR (500 MHz,  $CDCl_3$ )  $\delta$  (ppm) 7.53 (d,  $J$  = 8.0 Hz, 1H), 7.24 – 7.19 (m, 3H), 7.12 – 7.06 (m, 1H), 6.94 – 6.77 (m, 3H), 4.54 (s, 1H), 3.98 (s, 1H), 3.44 (d,  $J$  = 13.6 Hz, 1H), 3.06 (d,  $J$  = 13.8 Hz, 1H), 2.79 (br s, 1H), 2.76 – 2.64 (m, 2H), 2.64 – 2.53 (m, 2H), 2.53 – 2.46 (m, 2H), 2.31 (m, 2H), 1.49 (m, 10H), 1.45 (s, 9H).

$^{13}C$  NMR (126 MHz,  $CDCl_3$ )  $\delta$  (ppm) 163.0 (d,  $J$  = 245.6 Hz), 155.4, 154.6, 142.9, 136.7, 133.0, 130.0, 128.3, 127.2, 126.1, 124.5, 115.7 (d,  $J$  = 20.9 Hz), 113.1 (d,  $J$  = 20.9 Hz), 79.3, 79.3, 61.7, 58.6, 58.2, 55.6, 45.2, 41.0, 35.5, 33.1, 28.6, 28.6.

<sup>19</sup>F NMR (471 MHz, CDCl<sub>3</sub>) δ (ppm) –113.3 (dd, *J* = 14.7, 8.3 Hz).

HRMS (ESI+-Orbitrap) *m/z*: [M+H]<sup>+</sup> Calcd for C<sub>30</sub>H<sub>41</sub>N<sub>3</sub>FO<sub>4</sub> 526.3076, found 526.3077.

- *tert*-Butyl 5'-((*tert*-butoxycarbonyl)amino)-1'-(3,4-dimethoxyphenethyl)spiro[indoline-2,3'-piperidine]-1-carboxylate (**7d**)

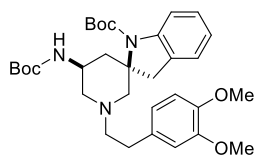

C<sub>32</sub>H<sub>45</sub>N<sub>3</sub>O<sub>6</sub>  
567.7 g/mol

Product **7d** was synthesized according to the general procedure C using compound **6d** (56 mg, 0.15 mmol, 1.0 eq.), methanol (62 mL), DCM (5 mL), Boc<sub>2</sub>O (0.07 mL, 0.34 mmol, 2.2 eq.), and triethylamine (0.05 mL, 0.34 mmol, 2.2 eq.). Flash chromatography over silica gel (eluent: pentane/EtOAc, 9/1 to 8/2) afforded the title compound (37 mg, 0.06 mmol, 37 %) as a white solid.

<sup>1</sup>H NMR (500 MHz, CDCl<sub>3</sub>) δ (ppm) 7.54 (d, *J* = 7.9 Hz, 1H), 7.24 – 7.18 (m, 2H), 7.12 – 7.06 (m, 1H), 6.76 (d, *J* = 8.5 Hz, 1H), 6.68 – 6.64 (m, 2H), 5.18 (br s, 1H), 4.68 (br s, 1H), 4.06 – 3.96 (br s, 1H), 3.85 (dd, *J* = 10.2, 5.7 Hz, 6H), 3.46 (d, *J* = 13.4 Hz, 1H), 3.07 (d, *J* = 13.8 Hz, 1H), 2.79 (br s, 1H), 2.72 – 2.45 (m, 6H), 2.35 – 2.25 (br m, 2H), 1.48 (s, 9H), 1.45 (s, 9H).

<sup>13</sup>C NMR (126 MHz, CDCl<sub>3</sub>) δ (ppm) 155.4, 154.6, 149.0, 147.4, 136.7, 133.0, 132.8, 128.2, 127.1, 126.1, 120.7, 111.8, 111.2, 79.3, 61.5, 59.6, 58.6, 56.0, 55.6, 45.2, 41.1, 35.6, 32.9, 29.9, 28.7, 28.6.

HRMS (ESI+-Orbitrap) *m/z*: [M+H]<sup>+</sup> Calcd for C<sub>32</sub>H<sub>46</sub>N<sub>3</sub>O<sub>6</sub> 568.3381, found 568.3371.

- *tert*-Butyl 5'-((*tert*-butoxycarbonyl)amino)-1'-(2-cyclohexylethyl)spiro[indoline-2,3'-piperidine]-1-carboxylate (**7e**)

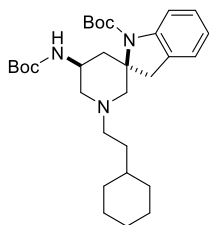

C<sub>30</sub>H<sub>47</sub>N<sub>3</sub>O<sub>4</sub>  
513.7 g/mol

Product **7e** was synthesized according to the general procedure C using compound **6e** (40 mg, 0.13 mmol, 1.0 eq.), methanol (52 mL), DCM (5 mL), Boc<sub>2</sub>O (0.06 mL, 0.28 mmol, 2.2 eq.), and triethylamine (0.04 mL, 0.28 mmol, 2.2 eq.). Flash chromatography over silica gel (eluent: pentane/EtOAc, 95/5 to 8/2) afforded the title compound (17 mg, 0.03 mmol, 26 %) as a white solid. Note: Products **7e** was isolated as mixture of rotamers.

<sup>1</sup>H NMR (500 MHz, CDCl<sub>3</sub>) δ 7.54 – 7.42 (m, 2H), 7.24 (m, 3H), 7.10 – 7.04 (m, 1H), 6.89 – 6.81 (m, 2H), 5.73 (s, 0.3H), 4.26 (d, *J* = 3.2 Hz, 1H), 3.83 – 3.76 (m, 3H), 3.71 (d, *J* = 13.5 Hz, 0.6H), 3.65 (d, *J* = 13.1 Hz, 0.3H), 3.62 – 3.52 (m, 1H), 3.48 (dd, *J* = 13.3, 5.9 Hz, 1H), 3.36 (d, *J* = 10.1 Hz, 0.3H), 3.22 (d, *J* = 14.2 Hz, 0.3H), 3.19 (t, *J* = 11.1 Hz, 0.6H), 3.07 (ddd, *J* = 18.7, 11.0, 2.9 Hz, 1H), 2.24 (d, *J* = 10.6 Hz, 0.3H), 2.18 (d, *J* = 10.5 Hz, 0.6H), 2.10 – 2.03 (m, 1H), 1.64 (dd, *J* = 11.2, 5.7 Hz, 1H), 1.58 (s, 9H), 1.48 (ddd, *J* = 7.0, 4.1, 2.2 Hz, 1H), 1.35 (d, *J* = 3.7 Hz, 9H).

<sup>13</sup>C NMR (126 MHz, CDCl<sub>3</sub>) δ 169.7, 158.6, 158.6, 157.6, 155.5, 136.5, 136.3, 133.4, 132.9, 132.4, 132.2, 130.0, 129.9, 129.9, 129.9, 129.9, 129.5, 129.4, 128.1, 127.9, 127.1, 126.0, 125.9, 113.7, 113.5, 113.4 (2C), 80.8, 80.7, 80.7, 80.4, 79.1, 67.6, 67.5, 60.9, 60.7, 60.4, 58.7, 55.2, 54.9, 54.4, 54.3, 53.4, 40.2, 39.7, 38.0, 28.6, 28.5, 28.1, 27.9.

HRMS (ESI+-Orbitrap) *m/z*: [M+H]<sup>+</sup> Calcd for C<sub>30</sub>H<sub>48</sub>N<sub>3</sub>O<sub>4</sub> 514.3639, found 514.3777.



- *tert*-Butyl 5'-((*tert*-butoxycarbonyl)amino)-1'-(4-hydroxybutyl)spiro[indoline-2,3'-piperidine]-1-carboxylate (**7f**)

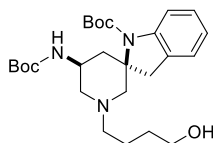

$C_{26}H_{41}N_3O_5$

475.6 g/mol

Product **7f** was synthesized according to the general procedure C using compound **6f** (51 mg, 0.12 mmol, 1.0 eq., 63 %), methanol (70 mL), DCM (5 mL),  $Boc_2O$  (0.09 mL, 0.40 mmol, 3.5 eq.), and triethylamine (0.06 mL, 0.40 mmol, 3.5 eq.). Flash chromatography over silica gel (eluent: pentane/EtOAc, 9/1 to 8/2) afforded the title compound (12 mg, 0.02 mmol, 17 %) as a white solid.

$^1H$  NMR (500 MHz,  $CDCl_3$ )  $\delta$  (ppm) 7.54 (d,  $J$  = 8.0 Hz, 1H), 7.26 – 7.20 (m, 2H), 7.11 – 7.06 (m, 1H), 4.85 (s, 1H), 4.00 (s, 1H), 3.61 (d,  $J$  = 5.5 Hz, 2H), 3.42 (d,  $J$  = 13.3 Hz, 1H), 3.10 (d,  $J$  = 13.8 Hz, 1H), 2.85 – 2.60 (m, 2H), 2.46 (br s, 1H), 2.38 – 2.15 (m, 4H), 1.68 – 1.17 (m, 23H).

$^{13}C$  NMR (126 MHz,  $CDCl_3$ )  $\delta$  (ppm) 155.5, 154.7, 136.7, 133.0, 132.9, 128.3, 127.2, 126.1, 79.5, 79.3, 62.7, 61.7, 58.4, 58.2, 55.6, 45.1, 41.2, 35.7, 31.2, 29.9, 28.7, 28.6, 23.7.

HRMS (ESI+-Orbitrap)  $m/z$ :  $[M+H]^+$  Calcd for  $C_{26}H_{42}N_3O_5$  476.3119, found 476.3104.

- *tert*-Butyl 5'-((*tert*-butoxycarbonyl)amino)-1'-(2-(pyrrolidin-1-yl)ethyl)spiro[indoline-2,3'-piperidine]-1-carboxylate (**7g**)

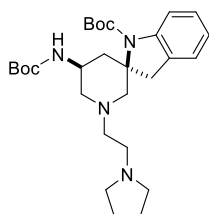

$C_{28}H_{44}N_4O_4$

500.7 g/mol

Product **7g** was synthesized according to the general procedure C using compound **6g** (35 mg, 0.12 mmol, 1.0 eq.), methanol (47 mL), DCM (5 mL),  $Boc_2O$  (0.06 mL, 0.26 mmol, 2.2 eq.), and triethylamine (0.04 mL, 0.26 mmol, 2.2 eq.). Flash chromatography over silica gel (eluent: DCM/MeOH/ $NH_4OH$ , 95/5/0 to 90/5/5) afforded the title compound (9 mg, 0.02 mmol, 15 %) as a white solid.

$^1H$  NMR (500 MHz,  $CDCl_3$ )  $\delta$  (ppm) 7.53 (d,  $J$  = 7.8 Hz, 1H), 7.25 – 7.20 (m, 2H), 7.10 – 7.05 (m, 1H), 5.43 (s, 2H), 3.92 (br s, 1H), 3.41 (br d,  $J$  = 13.0 Hz, 1H), 3.10 (d,  $J$  = 13.7 Hz, 1H), 2.84 – 2.45 (m, 11H), 2.38 – 2.23 (m, 2H), 1.85 (s, 4H), 1.59 – 1.46 (m, 9H), 1.43 (s, 9H).

$^{13}C$  NMR (126 MHz,  $CDCl_3$ )  $\delta$  (ppm) 155.5, 154.9, 136.7, 133.0, 132.9, 128.2, 127.1, 126.1, 79.1, 60.6, 58.5, 55.7, 54.3, 53.1, 45.6, 41.2, 35.4, 28.7, 28.6, 23.4.

HRMS (ESI+-Orbitrap)  $m/z$ :  $[M+H]^+$  Calcd for  $C_{28}H_{44}N_4O_4$  501.3435, found 501.3418.

- *tert*-Butyl 5'-((*tert*-butoxycarbonyl)amino)-1'-isopropylspiro[indoline-2,3'-piperidine]-1-carboxylate (**7h**)

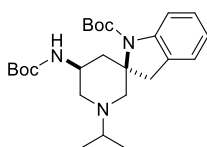

$C_{25}H_{39}N_3O_4$

445.6 g/mol

Product **7h** was synthesized according to the general procedure C using compound **6h** (80 mg, 0.33 mmol, 1.0 eq.), methanol (130 mL), DCM (5 mL),  $Boc_2O$  (0.15 mL, 0.72 mmol, 2.2 eq.), and triethylamine (0.10 mL, 0.72 mmol, 2.2 eq.). Flash chromatography over silica gel (Pentane/EtOAc, 95/5 to 8/2) afforded the title compound (49 mg, 0.1 mmol, 33 %) as a white solid.

$^1H$  NMR (500 MHz,  $CDCl_3$ )  $\delta$  (ppm) 7.54 (d,  $J$  = 7.9 Hz, 1H), 7.29 – 7.24 (m, 1H), 7.22 (t,  $J$  = 7.4 Hz, 1H), 7.07 (td,  $J$  = 8.0, 1.8 Hz, 1H), 5.21 (s, 1H), 4.88 – 4.59 (m,

1H), 3.97 (s, 1H), 3.47 (d,  $J = 13.5$  Hz, 1H), 3.07 (d,  $J = 13.8$  Hz, 1H), 2.75 – 2.59 (m, 2H), 2.56 – 2.32 (m, 4H), 1.51 (s, 9H), 1.44 (s, 9H), 0.99 – 0.90 (m, 6H).

$^{13}\text{C}$  NMR (126 MHz,  $\text{CDCl}_3$ )  $\delta$  (ppm) 155.4, 154.7, 136.9, 133.0, 133.0, 128.2, 127.1, 126.1, 79.2, 57.4, 55.5, 54.6, 54.2, 45.2, 41.2, 36.0, 28.7, 28.6, 18.3, 17.8.

HRMS (ESI+-Orbitrap)  $m/z$ :  $[\text{M}+\text{H}]^+$  Calcd for  $\text{C}_{25}\text{H}_{40}\text{N}_3\text{O}_4$  446.3013, found 446.3004.

#### General procedure D: Boc-deprotection

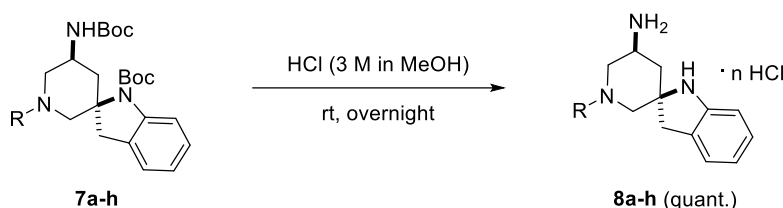

Compound **7a-h** (1.0 eq.) were dissolved in a hydrogen chloride solution (3 M in MeOH). The resulting mixture was stirred at r.t. overnight. Concentration under reduced pressure finally afforded the desired product **8a-h** in quantitative yields.

- **1'-(4-Methoxybenzyl)spiro[indoline-2,3'-piperidin]-5'-amine (8a)**

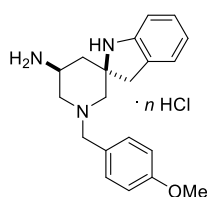

$\text{C}_{20}\text{H}_{25}\text{N}_3\text{O}$   
323.4 g/mol

Compound **8a** (28 mg, 0.05 mmol, 1.0 eq.) was synthesized according to the general procedure D, using an HCl solution (1 mL, 1.5 M in MeOH). The title compound (24 mg, 0.05 mmol, quantitative) was isolated as a white powder.

$^1\text{H}$  NMR (500 MHz,  $\text{D}_2\text{O}$ )  $\delta$  (ppm) 7.63 (d,  $J = 8.0$  Hz, 1H), 7.36 (d,  $J = 8.4$  Hz, 2H), 7.18 (t,  $J = 7.7$  Hz, 1H), 7.09 (t,  $J = 7.5$  Hz, 1H), 7.02 (d,  $J = 8.5$  Hz, 2H), 6.91 (d,  $J = 7.5$  Hz, 1H), 3.86 – 3.80 (m, 5H), 3.63 (d,  $J = 12.8$  Hz, 1H), 3.38 – 3.33 (m, 1H), 3.32 – 3.25 (m, 2H), 3.07 (d,  $J = 11.8$  Hz, 1H), 2.46 (d,  $J = 10.5$  Hz, 1H), 2.38 – 2.30 (m, 1H), 2.17 (d,  $J = 11.4$  Hz, 1H), 1.73 (t,  $J = 12.1$  Hz, 1H).

$^{13}\text{C}$  NMR (126 MHz,  $\text{D}_2\text{O}$ )  $\delta$  (ppm) 159.8, 134.6, 133.7, 133.7, 132.6, 130.9, 128.9, 126.1, 115.1, 61.6, 56.9, 56.6, 56.4, 55.7, 45.5, 39.6, 37.2.

HRMS (ESI+-Orbitrap)  $m/z$ :  $[\text{M}+\text{H}]^+$  Calcd for  $\text{C}_{20}\text{H}_{26}\text{N}_3\text{O}$  324.2070, found 324.2062.

- **1'-(Naphthalen-1-ylmethyl)spiro[indoline-2,3'-piperidin]-5'-amine (8b)**

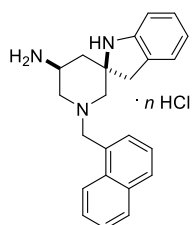

$\text{C}_{23}\text{H}_{25}\text{N}_3$   
343.5 g/mol

Compound **8b** (32 mg, 0.06 mmol, 1.0 eq.) was synthesized according to the general procedure D, using an HCl solution (1 mL, 1.5 M in MeOH). The title compound (18 mg, 0.06 mmol, quantitative) was isolated as a white powder.

$^1\text{H}$  NMR (500 MHz,  $\text{CD}_3\text{OD}$ )  $\delta$  (ppm) 8.25 (d,  $J = 8.4$  Hz, 1H), 7.87 (d,  $J = 7.6$  Hz, 1H), 7.85 – 7.82 (m, 1H), 7.52 – 7.47 (m, 1H), 7.47 – 7.42 (m, 1H), 7.37 – 7.30 (m, 2H), 7.03 (t,  $J = 7.5$  Hz, 1H), 6.89 – 6.84 (m, 2H), 6.49 – 6.44 (m, 2H), 4.32 (d,  $J = 12.6$  Hz, 1H), 3.78 (d,  $J = 12.6$  Hz, 1H), 3.70 – 3.61 (m, 1H), 3.44 (dd,  $J = 10.6, 4.3$  Hz, 1H), 2.94 (d,  $J = 14.3$  Hz, 1H), 2.85 (d,  $J = 11.2$  Hz, 1H), 2.75 (d,  $J = 14.2$  Hz, 1H), 2.29 –

2.23 (m, 1H), 2.20 (t,  $J = 10.8$  Hz, 1H), 1.97 (d,  $J = 11.3$  Hz, 1H), 1.65 (t,  $J = 12.2$  Hz, 1H).

$^{13}\text{C}$  NMR (126 MHz,  $\text{CD}_3\text{OD}$ )  $\delta$  (ppm) 134.4, 132.7, 132.6, 132.2, 130.1, 128.8, 128.6, 128.4, 128.4, 127.4, 126.0, 125.8, 124.9, 124.4, 59.9, 56.1, 56.0, 54.7, 44.7, 39.0, 37.1.

HRMS (ESI+-Orbitrap)  $m/z$ :  $[\text{M}+\text{H}]^+$  Calcd for  $\text{C}_{23}\text{H}_{25}\text{N}_3$  344.2121, found 344.2127

- *1'-(3-Fluorophenethyl)spiro[indoline-2,3'-piperidin]-5'-amine (8c)*

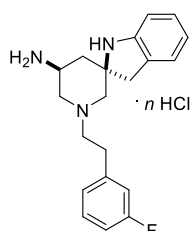

$\text{C}_{20}\text{H}_{24}\text{FN}_3$   
325.4 g/mol

Compound **8c** (20 mg, 0.04 mmol, 1.0 eq.) was synthesized according to the general procedure D, using an HCl solution (0.5 mL, 1.5 M in MeOH). The title compound (18 mg, 0.04 mmol, quantitative) was isolated as a white powder.

$^1\text{H}$  NMR (500 MHz,  $\text{D}_2\text{O}$ )  $\delta$  (ppm) 7.75 – 7.69 (m, 1H), 7.42 (dd,  $J = 14.2, 7.7$  Hz, 1H), 7.33 – 7.27 (m, 2H), 7.22 (d,  $J = 7.6$  Hz, 1H), 7.17 (d,  $J = 10.0$  Hz, 1H), 7.03 (dd,  $J = 11.9, 5.2$  Hz, 1H), 6.79 (d,  $J = 3.6$  Hz, 1H), 3.88 (dd,  $J = 12.9, 8.9$  Hz, 1H), 3.63 (d,  $J = 7.5$  Hz, 1H), 3.25 (s, 2H), 3.07 – 2.91 (m, 5H), 2.51 (d,  $J = 9.9$  Hz, 1H), 2.41 (d,  $J = 11.7$  Hz, 1H), 2.36 (t,  $J = 10.7$  Hz, 1H), 1.79 (t,  $J = 12.2$  Hz, 1H).

$^{13}\text{C}$  NMR (126 MHz,  $\text{D}_2\text{O}$ )  $\delta$  (ppm) 163.8 (d,  $J = 243.2$  Hz), 143.8 (d,  $J = 7.2$  Hz), 134.6, 133.9, 133.8, 131.2 (d,  $J = 8.5$  Hz), 131.0, 129.1, 126.0 (d,  $J = 4.0$  Hz), 116.7 (d,  $J = 20.9$  Hz), 114.1 (d,  $J = 20.8$  Hz), 59.0, 58.5, 57.0, 54.5, 45.7, 39.4, 37.0, 32.7.

$^{19}\text{F}$  NMR (471 MHz,  $\text{D}_2\text{O}$ )  $\delta$  (ppm) –114.2.

HRMS (ESI+-Orbitrap)  $m/z$ :  $[\text{M}+\text{H}]^+$  Calcd for  $\text{C}_{20}\text{H}_{25}\text{N}_3\text{F}$  326.2027, found 326.2021.

- *1'-(3,4-Dimethoxyphenethyl)spiro[indoline-2,3'-piperidin]-5'-amine (8d)*

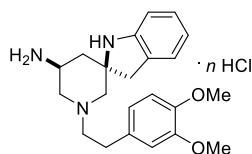

$\text{C}_{22}\text{H}_{29}\text{N}_3\text{O}_2$   
367.5 g/mol

Compound **8d** (23 mg, 0.05 mmol, 1.0 eq.) was synthesized according to the general procedure D, using an HCl solution (1 mL, 1.5 M in MeOH). The title compound (18 mg, 0.05 mmol, quantitative) was isolated as a white powder.

$^1\text{H}$  NMR (500 MHz,  $\text{D}_2\text{O}$ )  $\delta$  (ppm) 7.53 (d,  $J = 7.9$  Hz, 1H), 7.11 (t,  $J = 7.6$  Hz, 1H), 7.06 (t,  $J = 7.4$  Hz, 1H), 6.93 – 6.87 (m, 2H), 6.82 (d,  $J = 8.2$  Hz, 1H), 6.48 (d,  $J = 6.7$  Hz, 1H), 3.77 – 3.67 (m, 4H), 3.62 (s, 3H), 3.42 (d,  $J = 8.0$  Hz, 1H), 3.10 – 3.00 (m, 2H), 2.84 – 2.68 (m, 5H), 2.32 (d,  $J = 9.5$  Hz, 1H), 2.24 – 2.14 (m, 2H), 1.59 (t,  $J = 12.1$  Hz, 1H).

$^{13}\text{C}$  NMR (126 MHz,  $\text{D}_2\text{O}$ )  $\delta$  (ppm) 149.3, 147.8, 134.9, 134.6, 134.1, 133.9, 131.1, 129.1, 126.2, 123.1, 114.0, 113.3, 59.4, 58.8, 57.2, 56.9, 54.7, 45.9, 39.7, 37.2, 32.8.

HRMS (ESI+-Orbitrap)  $m/z$ :  $[\text{M}+\text{H}]^+$  Calcd for  $\text{C}_{22}\text{H}_{30}\text{N}_3\text{O}_2$  368.2333, found 368.2322.

- *1'-(2-Cyclohexylethyl)spiro[indoline-2,3'-piperidin]-5'-amine (8e)*

Compound **8d** (42 mg, 0.08 mmol, 1.0 eq.) was synthesized according to the general procedure D, using an HCl solution (1 mL, 1.5 M in MeOH). The title compound (10 mg, 0.03 mmol, quantitative) was isolated as a white powder.

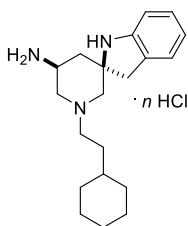

**<sup>1</sup>H NMR** (500 MHz, D<sub>2</sub>O) δ (ppm) 7.73 – 7.67 (m, 1H), 7.44 – 7.37 (br m, 1H), 7.35 – 7.31 (br m, 1H), 7.30 – 7.24 (br m, 1H), 3.96 (br s, 1H), 3.48 (br s, 1H), 3.42 – 3.21 (m, 3H), 2.95 (s, 2H), 2.74 (s, 2H), 2.45 – 2.36 (br m, 1H), 1.85 – 1.75 (br m, 1H), 1.70 – 1.47 (m, 8H), 1.31 (s, 1H), 1.24 – 1.06 (m, 4H), 1.00 – 0.85 (m, 2H).

**<sup>13</sup>C NMR** (126 MHz, D<sub>2</sub>O) δ (ppm) 134.8, 133.9, 133.7, 131.1, 129.2, 126.1, 58.2, 57.2, 55.8, 54.5, 45.1, 36.2, 35.2, 33.6, 33.5, 32.6, 27.0, 26.7.

C<sub>20</sub>H<sub>31</sub>N<sub>3</sub>  
313.5 g/mol

**HRMS** (ESI+-Orbitrap) m/z: [M+H]<sup>+</sup> Calcd for C<sub>20</sub>H<sub>32</sub>N<sub>3</sub> 314.2591, found 314.2578.

- **4-(5'-Aminospiro[indoline-2,3'-piperidin]-1'-yl)butan-1-ol (8f)**

Compound **8f** (6 mg, 0.01 mmol, 1.0 eq.) was synthesized according to the general procedure D, using an HCl solution (1 mL, 1.5 M in MeOH). The title compound (5 mg, 0.01 mmol, quantitative) was isolated as a white powder.

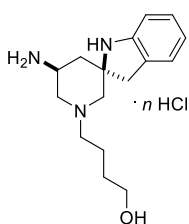

**<sup>1</sup>H NMR** (500 MHz, D<sub>2</sub>O) δ (ppm) 7.69 (d, *J* = 8.1 Hz, 1H), 7.40 (t, *J* = 7.5 Hz, 1H), 7.33 (d, *J* = 7.7 Hz, 1H), 7.27 (t, *J* = 7.7 Hz, 1H), 4.01 – 3.92 (m, 1H), 3.60 (t, *J* = 6.3 Hz, 2H), 3.48 (d, *J* = 8.5 Hz, 1H), 3.40 – 3.24 (m, 3H), 2.91 – 2.85 (m, 2H), 2.65 (d, *J* = 9.2 Hz, 2H), 2.43 (d, *J* = 11.6 Hz, 1H), 1.72 (ddd, *J* = 24.2, 19.9, 10.5 Hz, 3H), 1.61 – 1.54 (m, 2H).

C<sub>16</sub>H<sub>25</sub>N<sub>3</sub>O  
275.4 g/mol

**<sup>13</sup>C NMR** (126 MHz, D<sub>2</sub>O) δ (ppm) 134.8, 133.9, 133.6, 131.2, 129.3, 126.1, 62.1, 58.5, 58.3, 56.2, 54.5, 45.1, 40.4, 35.4, 29.8, 22.2.

**HRMS** (ESI+-Orbitrap) m/z: [M+H]<sup>+</sup> Calcd for C<sub>16</sub>H<sub>26</sub>N<sub>3</sub>O 276.2070, found 276.2062.

- **1'-(2-(pyrrolidin-1-yl)ethyl)spiro[indoline-2,3'-piperidin]-5'-amine (8g)**

Compound **8g** (4 mg, 0.01 mmol, 1.0 eq.) was synthesized according to the general procedure D, using an HCl solution (1 mL, 1.5 M in MeOH). The title compound (4 mg, 0.01 mmol, quantitative) was isolated as a white powder.

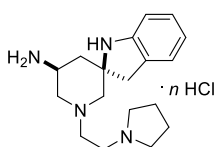

**<sup>1</sup>H NMR** (500 MHz, D<sub>2</sub>O) δ (ppm) 7.70 (d, *J* = 8.0 Hz, 1H), 7.40 (t, *J* = 7.5 Hz, 1H), 7.33 – 7.24 (m, 2H), 4.04 – 3.97 (m, 1H), 3.73 – 3.60 (m, 2H), 3.56 – 3.47 (m, 2H), 3.37 – 3.24 (m, 3H), 3.13 (t, *J* = 10.0 Hz, 3H), 3.00 – 2.93 (m, 1H), 2.87 – 2.80 (m, 1H), 2.44 (d, *J* = 11.5 Hz, 1H), 2.41 – 2.37 (m, 1H), 2.21 (t, *J* = 10.8 Hz, 1H), 2.16 – 2.06 (m, 2H), 2.04 – 1.92 (m, 2H), 1.57 (t, *J* = 12.4 Hz, 1H).

C<sub>18</sub>H<sub>28</sub>N<sub>4</sub>  
300.5 g/mol

**<sup>13</sup>C NMR** (126 MHz, D<sub>2</sub>O) δ (ppm) 134.9, 134.0, 133.7, 131.2, 129.3, 126.2, 60.6, 57.0, 56.0, 54.9, 54.8, 53.4, 52.4, 45.5, 39.6, 35.2, 23.6, 23.5.

**HRMS** (ESI+-Orbitrap) m/z: [M+H]<sup>+</sup> Calcd for C<sub>18</sub>H<sub>29</sub>N<sub>4</sub> 301.2387, found 301.2380.

- **1'-Isopropylspiro[indoline-2,3'-piperidin]-5'-amine (8h)**

Compound **8h** (40 mg, 0.09 mmol, 1.0 eq.) was synthesized according to the general procedure D, using an HCl solution (1 mL, 1.5 M in MeOH). The title compound (34 mg, 0.09 mmol, quantitative) was isolated as a white powder.

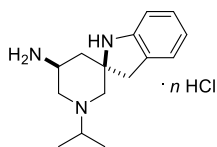

**<sup>1</sup>H NMR** (500 MHz, D<sub>2</sub>O) δ (ppm) 7.66 (d, *J* = 7.9 Hz, 1H), 7.36 (t, *J* = 7.0 Hz, 1H), 7.30 (d, *J* = 7.4 Hz, 1H), 7.24 (t, *J* = 7.4 Hz, 1H), 3.96 (s, 1H), 3.53 – 3.17 (m, 5H), 2.90 (s, 2H), 2.37 (d, *J* = 10.8 Hz, 1H), 1.79 (d, *J* = 10.7 Hz, 1H), 1.21 (t, *J* = 6.8 Hz, 6H).

C<sub>15</sub>H<sub>23</sub>N<sub>3</sub>  
245.4 g/mol

**<sup>13</sup>C NMR** (126 MHz, D<sub>2</sub>O) δ (ppm) 134.8, 134.0, 133.7, 131.1, 129.2, 126.2, 59.3, 55.8, 54.4, 50.8, 45.3, 35.0, 17.5, 17.0.

**HRMS** (ESI+-Orbitrap) *m/z*: [M+H]<sup>+</sup> Calcd for C<sub>15</sub>H<sub>23</sub>N<sub>3</sub> 246.1965, found 246.1954.

# Copies of $^1\text{H}$ NMR and $^{13}\text{C}$ NMR spectra

## $^1\text{H}$ NMR (500 MHz, $\text{CDCl}_3$ )

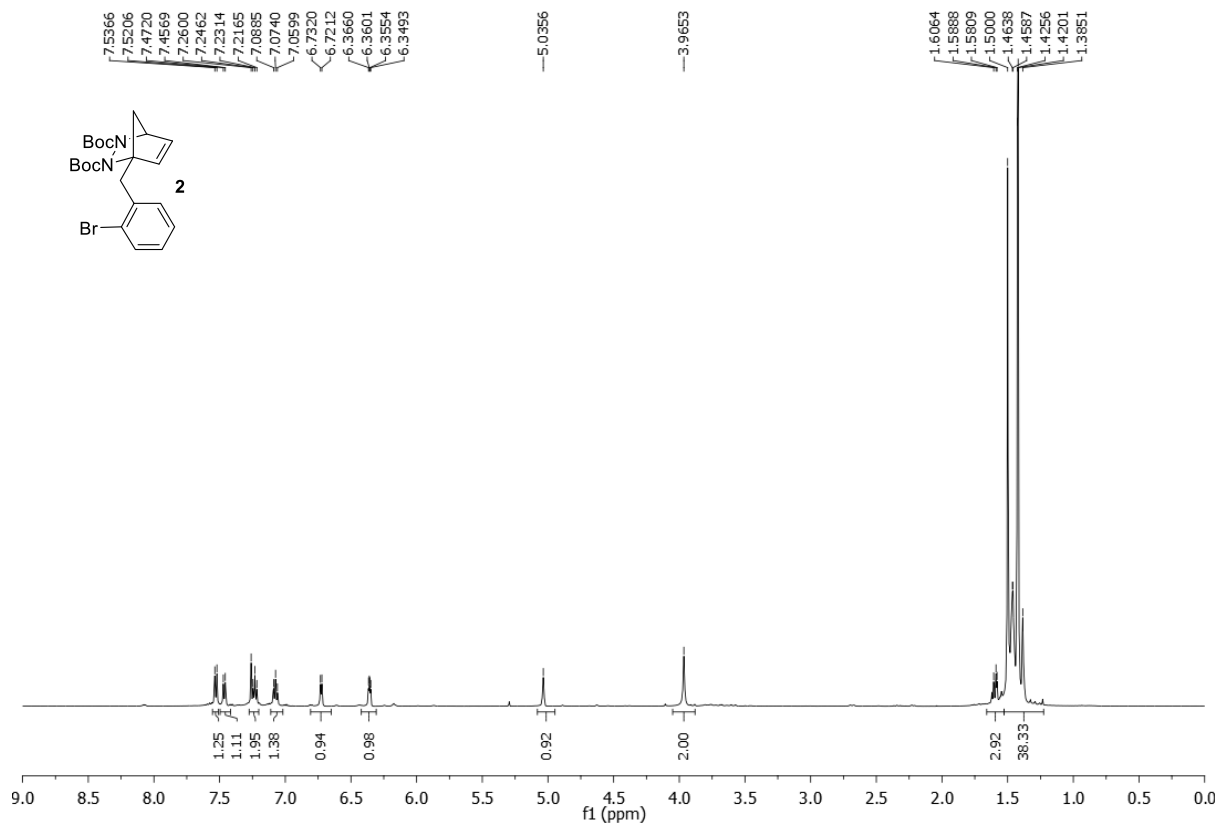

## $^{13}\text{C}\{^1\text{H}\}$ NMR (126 MHz, $\text{CDCl}_3$ )

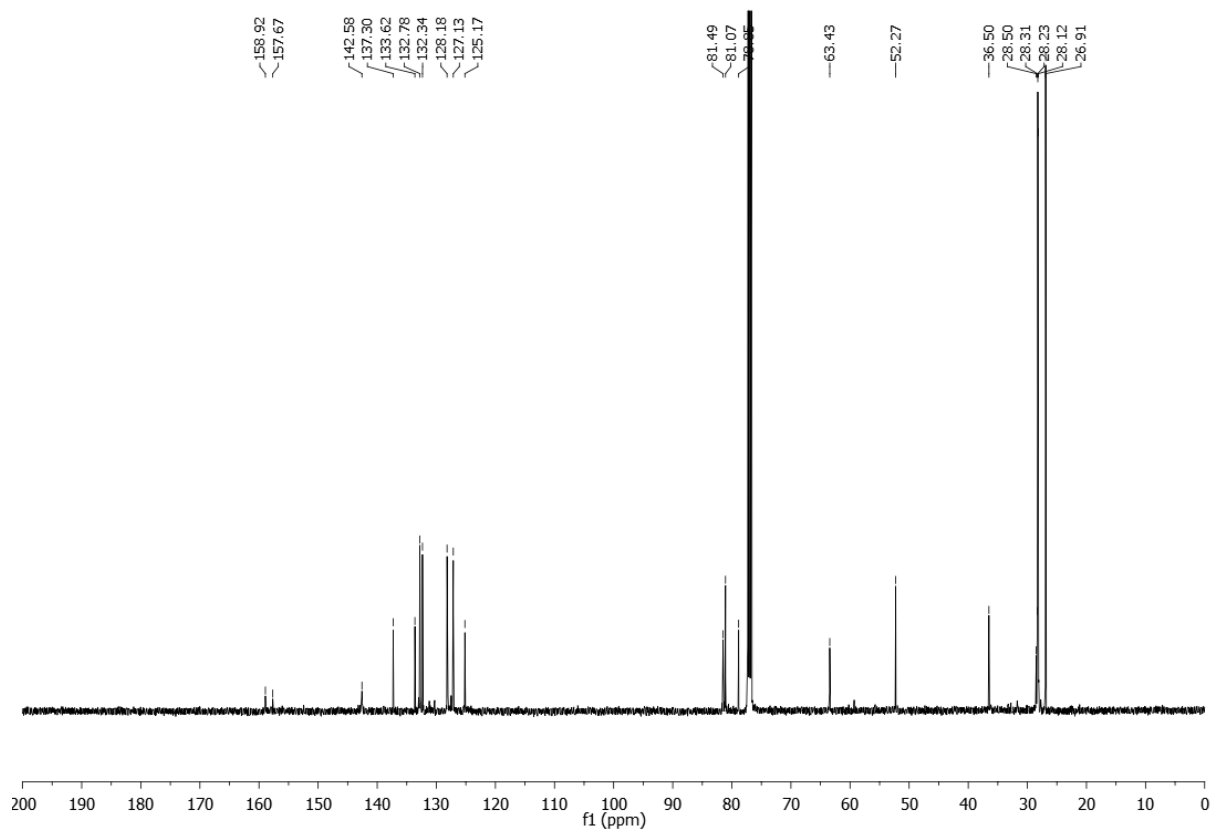

<sup>1</sup>H NMR (500 MHz, DMSO-d<sub>6</sub>)

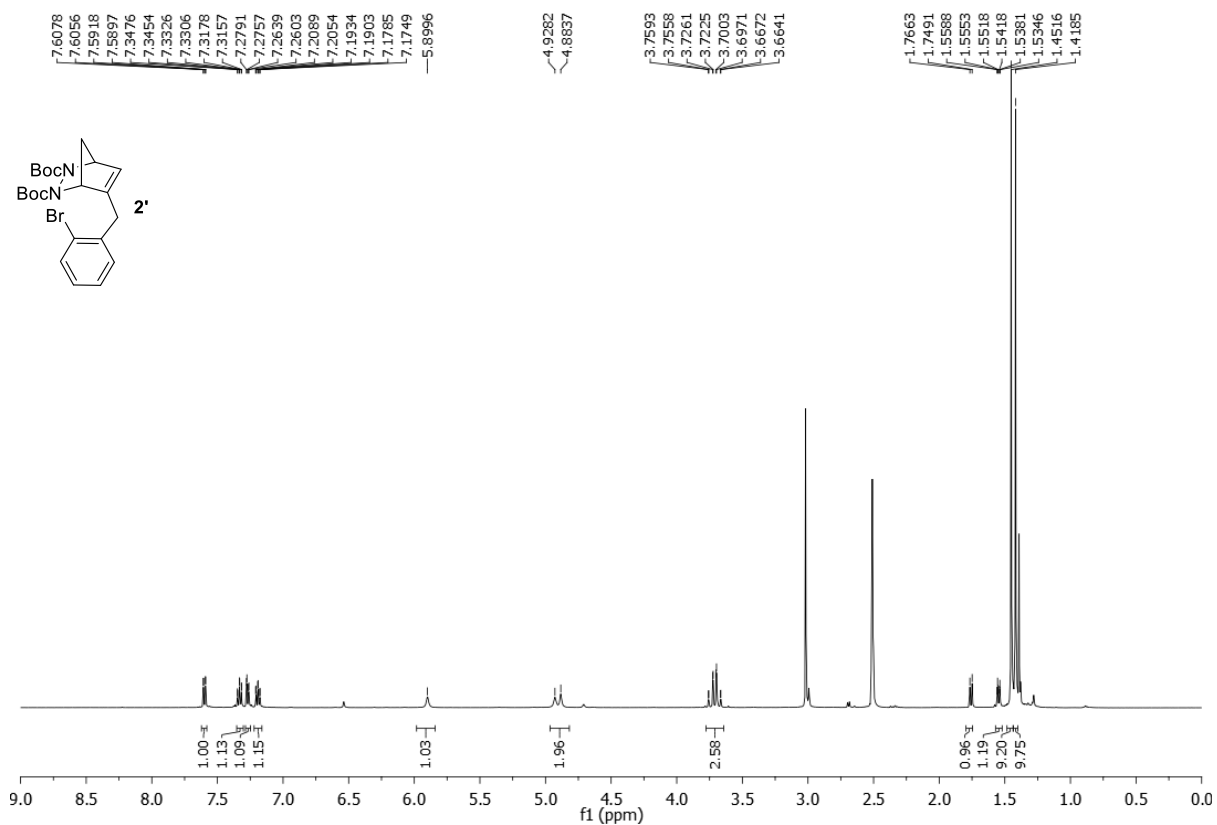

<sup>13</sup>C{<sup>1</sup>H} NMR (126 MHz, DMSO-d<sub>6</sub>)

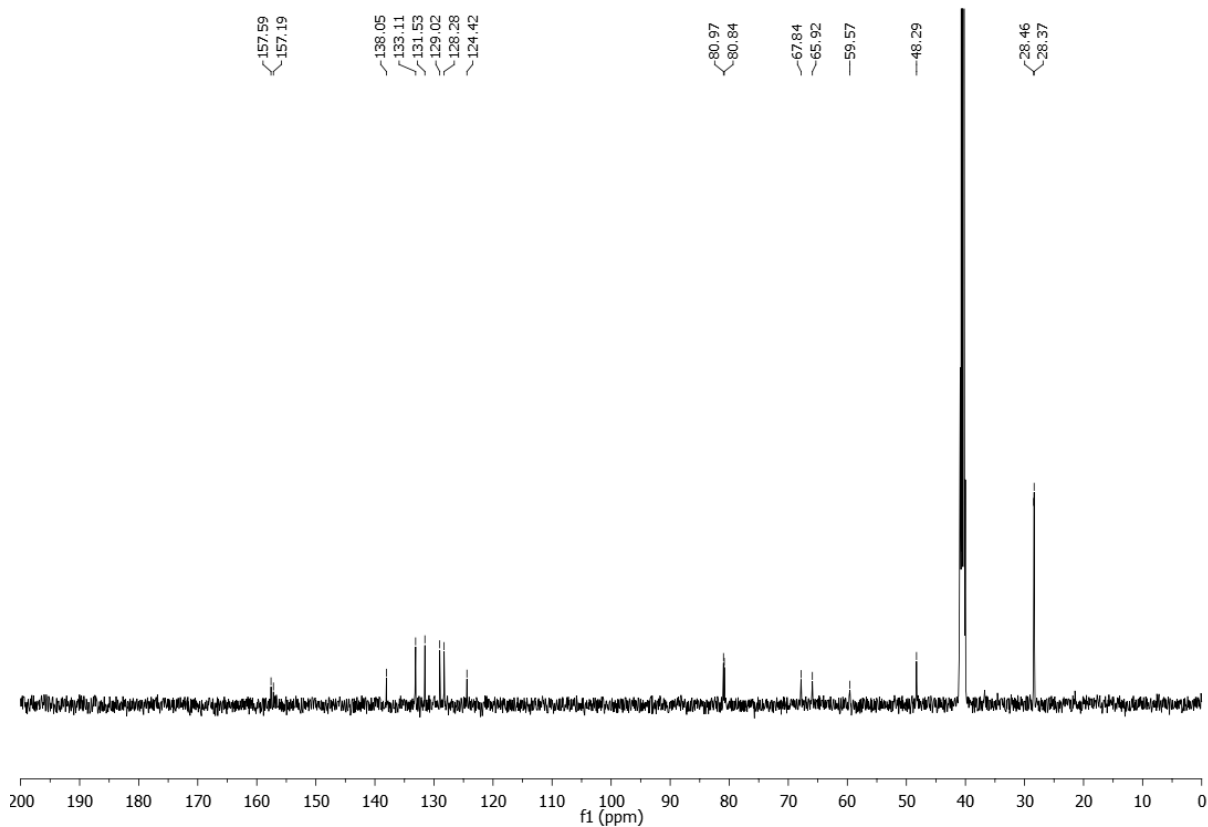

<sup>1</sup>H NMR (500 MHz, CDCl<sub>3</sub>)

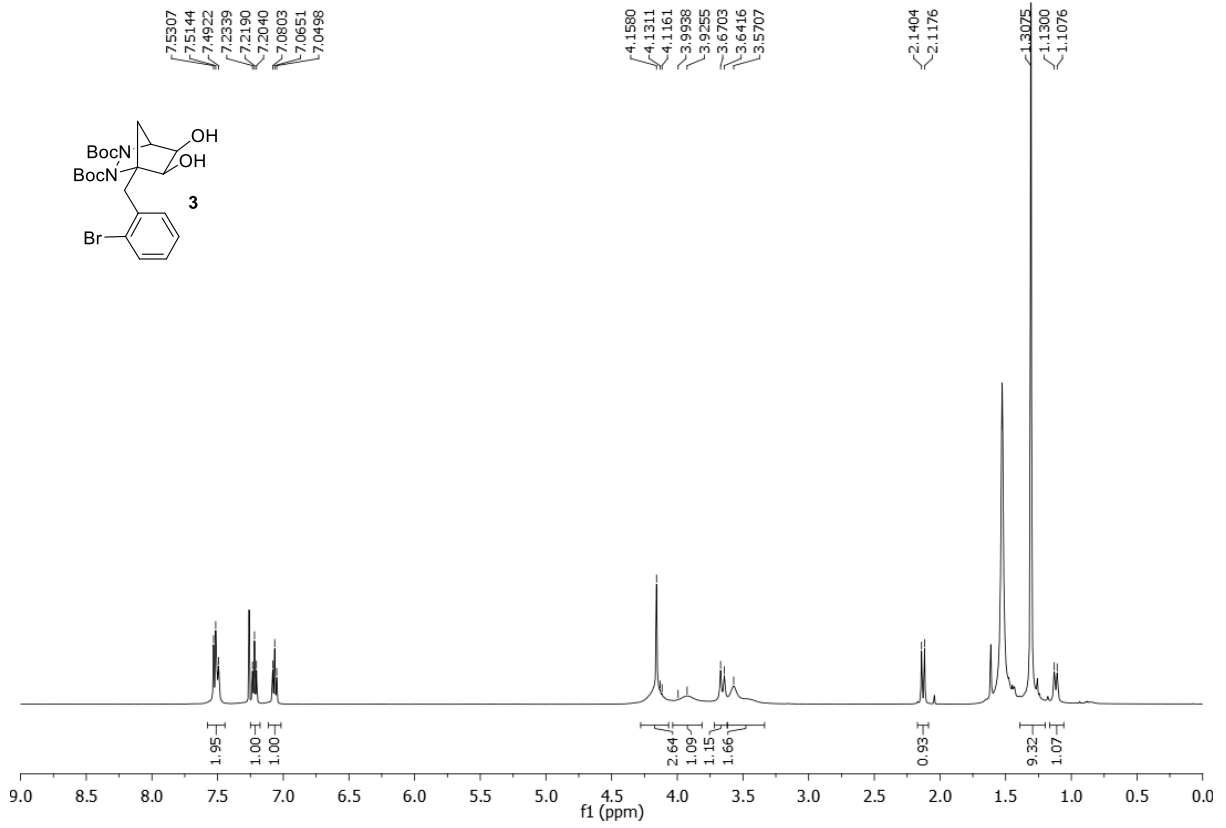

<sup>13</sup>C{<sup>1</sup>H} NMR (126 MHz, CDCl<sub>3</sub>)

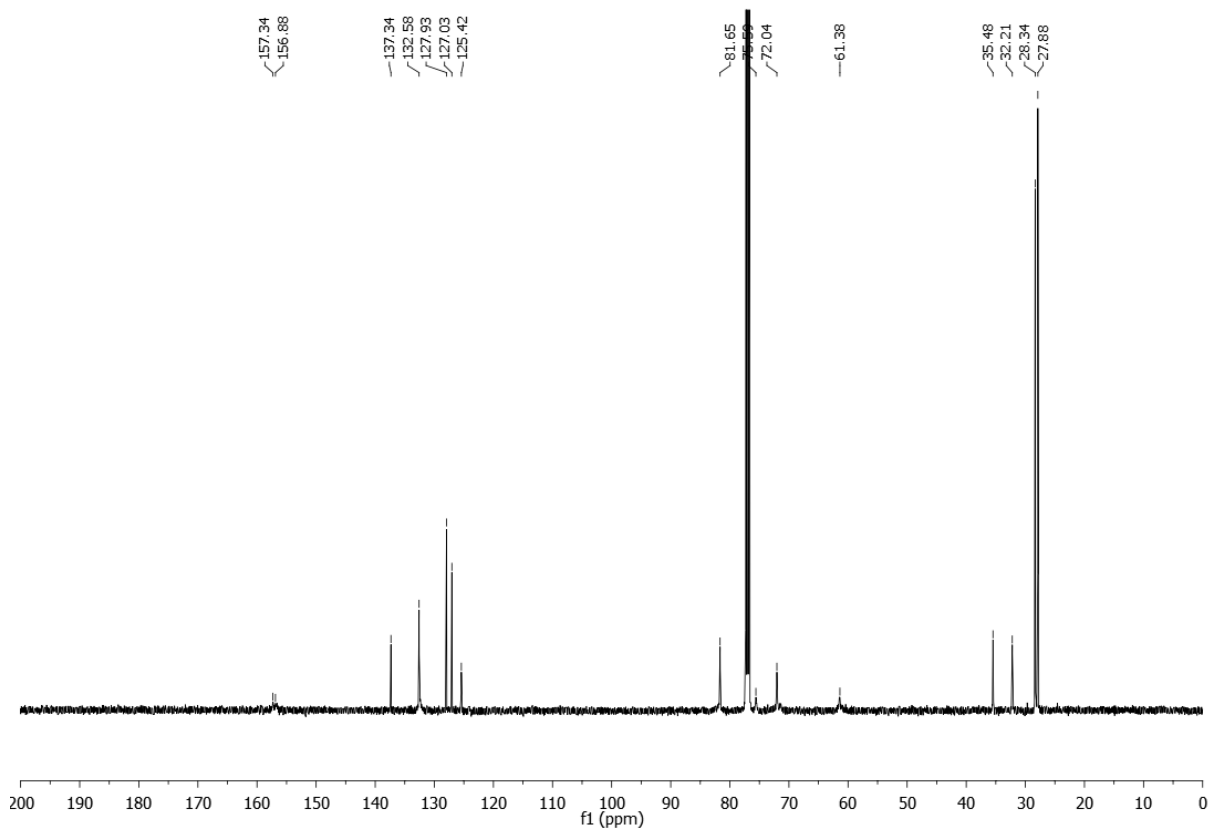



**<sup>1</sup>H NMR (500 MHz, CDCl<sub>3</sub>)**

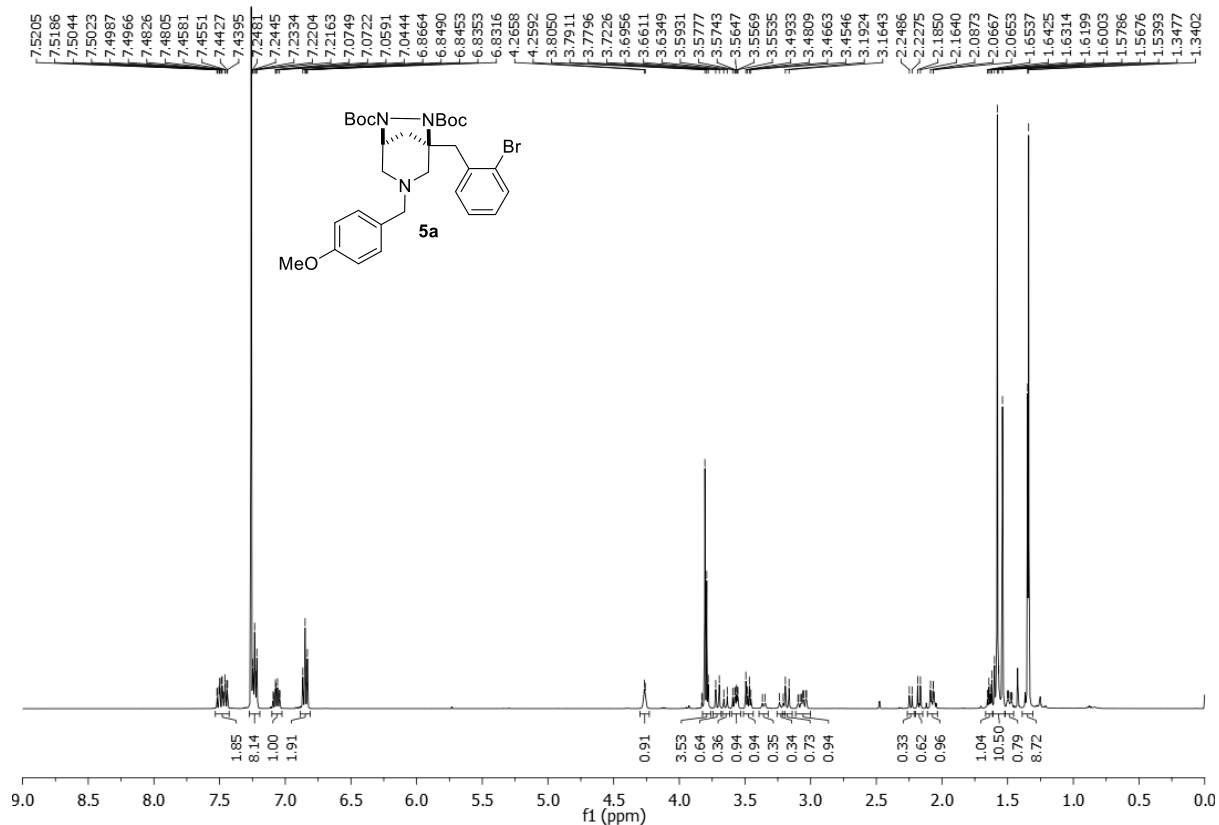

**<sup>13</sup>C{<sup>1</sup>H} NMR (126 MHz, CDCl<sub>3</sub>)**

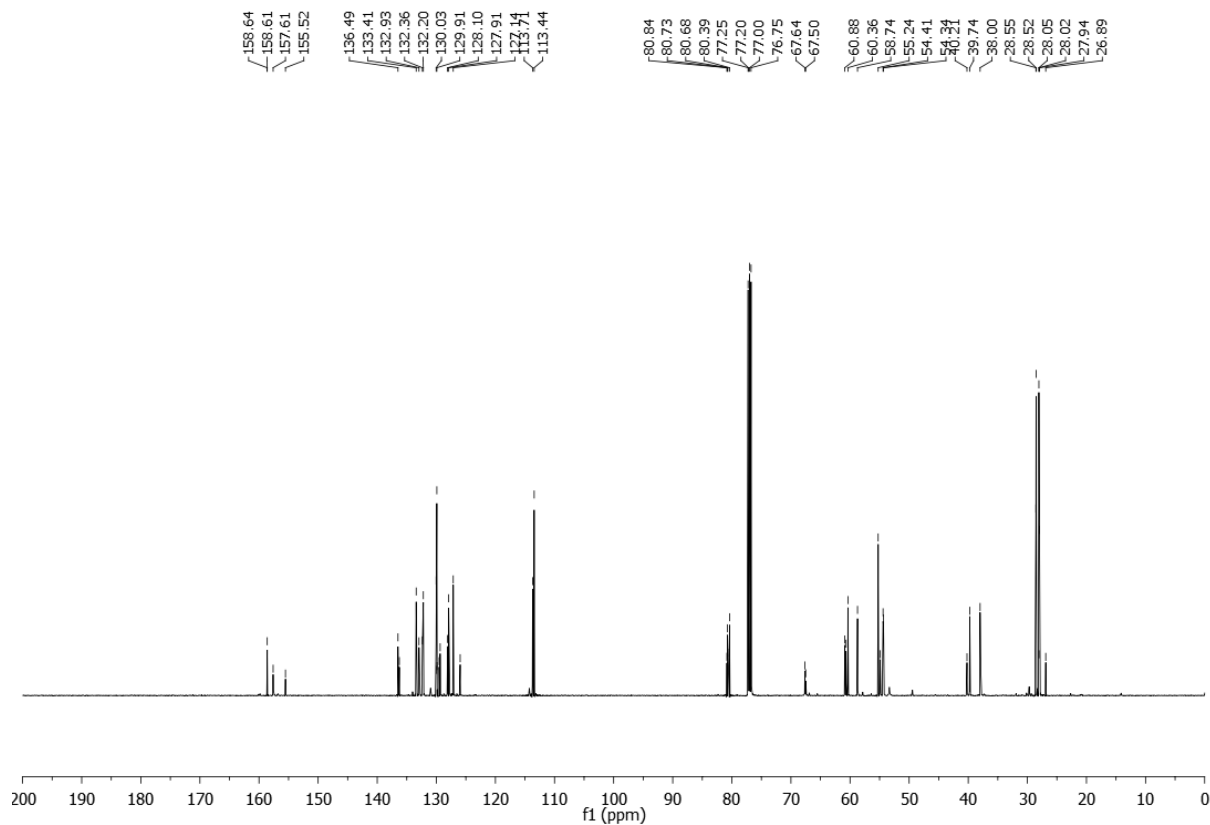

<sup>1</sup>H NMR (500 MHz, CDCl<sub>3</sub>)

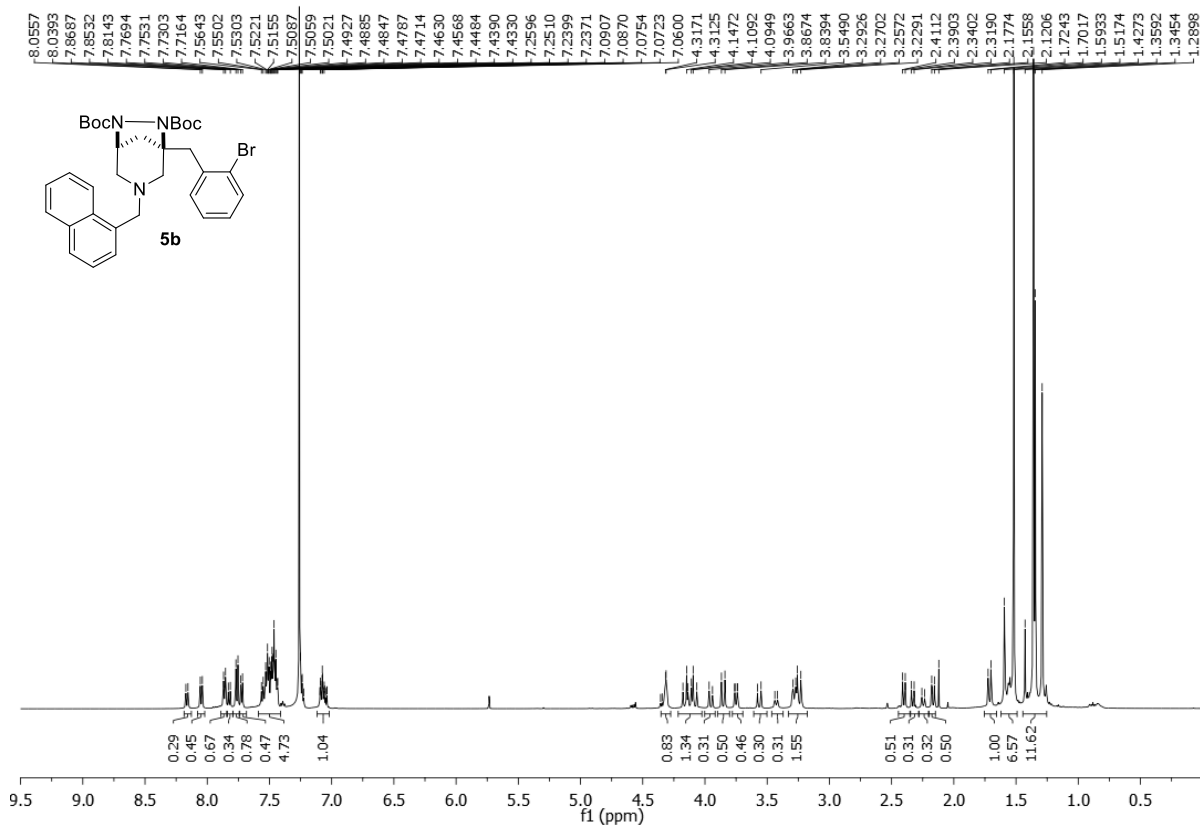

<sup>13</sup>C{<sup>1</sup>H} NMR (126 MHz, CDCl<sub>3</sub>)

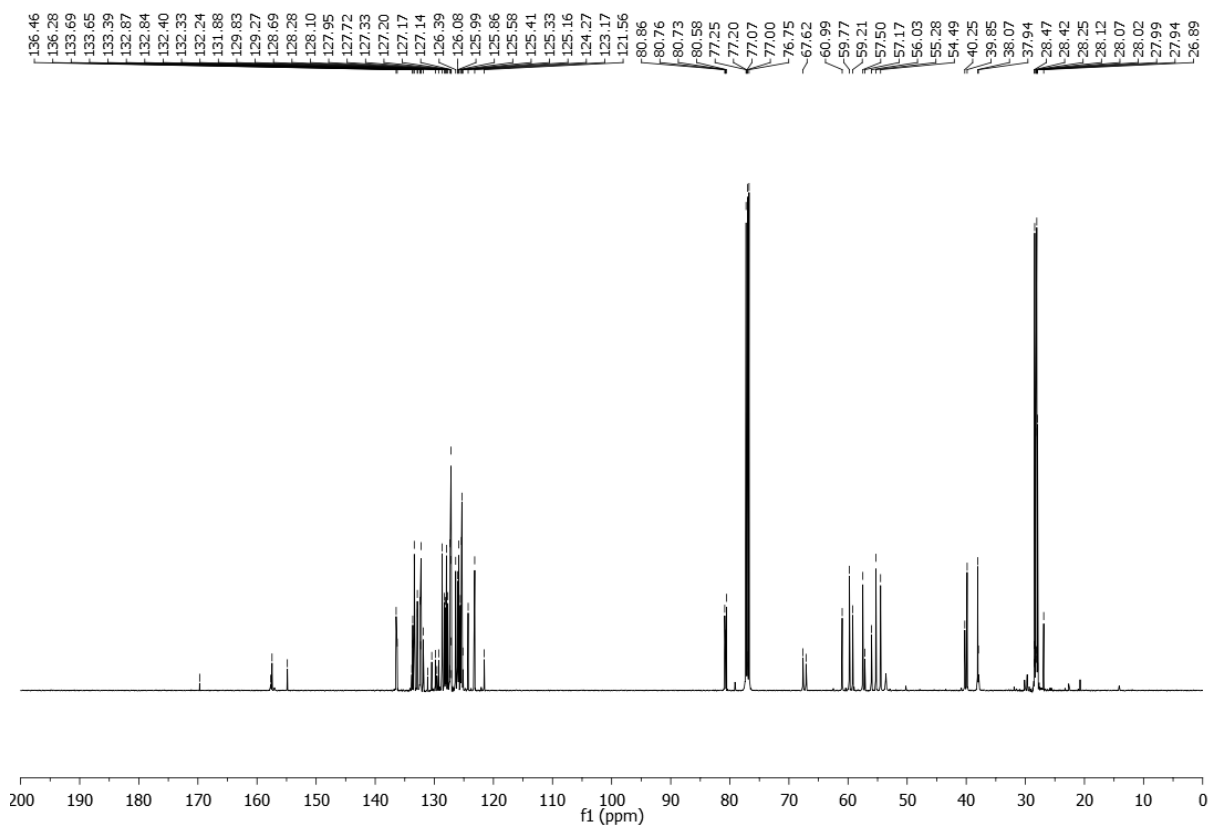

**<sup>1</sup>H NMR (500 MHz, CDCl<sub>3</sub>)**

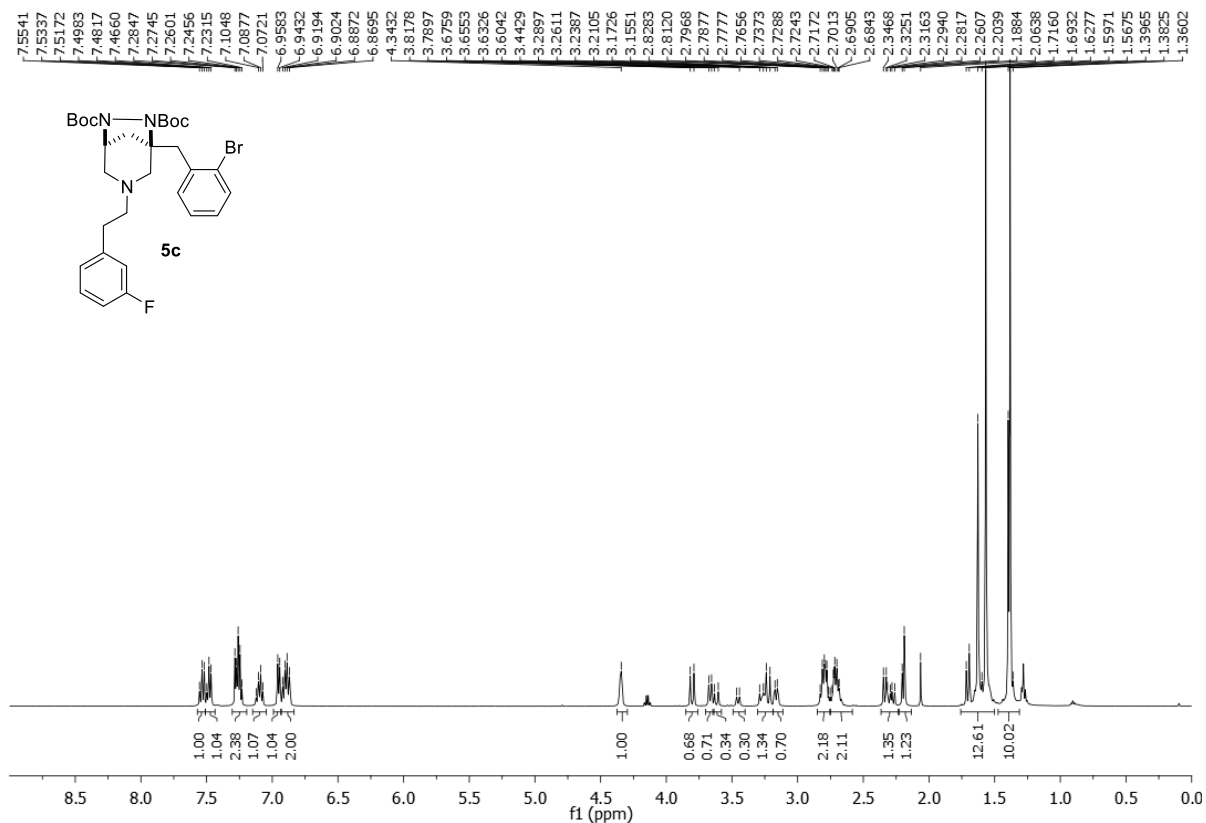

**<sup>13</sup>C{<sup>1</sup>H} NMR (126 MHz, CDCl<sub>3</sub>)**

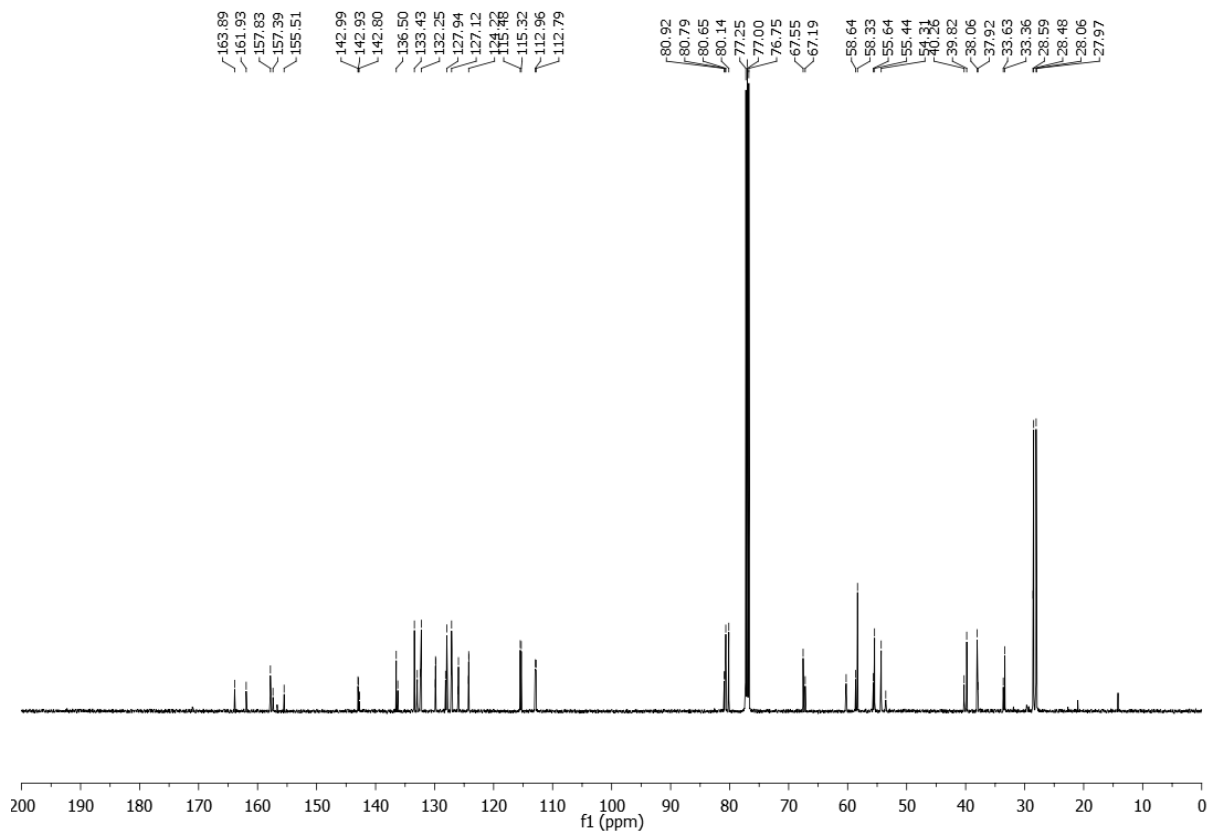

$^{19}\text{F}\{^{13}\text{C}\}$  NMR (471 MHz,  $\text{CDCl}_3$ )

---113.63

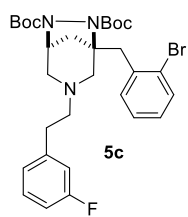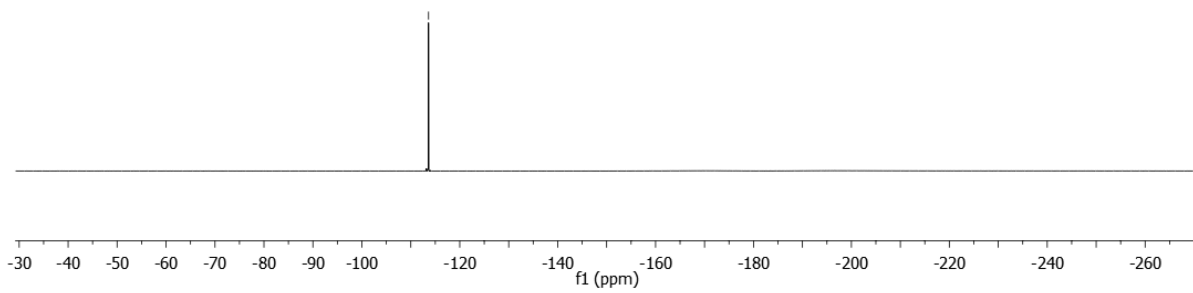

**<sup>1</sup>H NMR (500 MHz, CDCl<sub>3</sub>)**

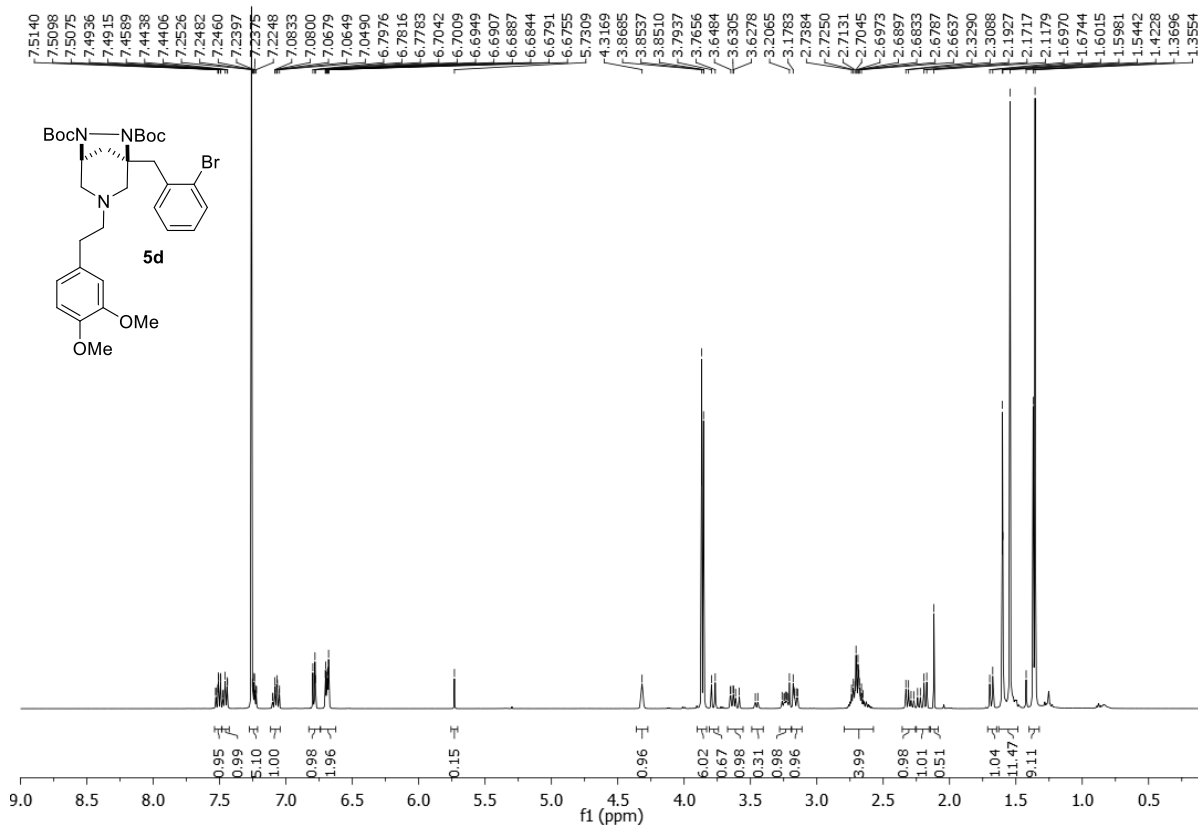

**<sup>13</sup>C{<sup>1</sup>H} NMR (126 MHz, CDCl<sub>3</sub>)**

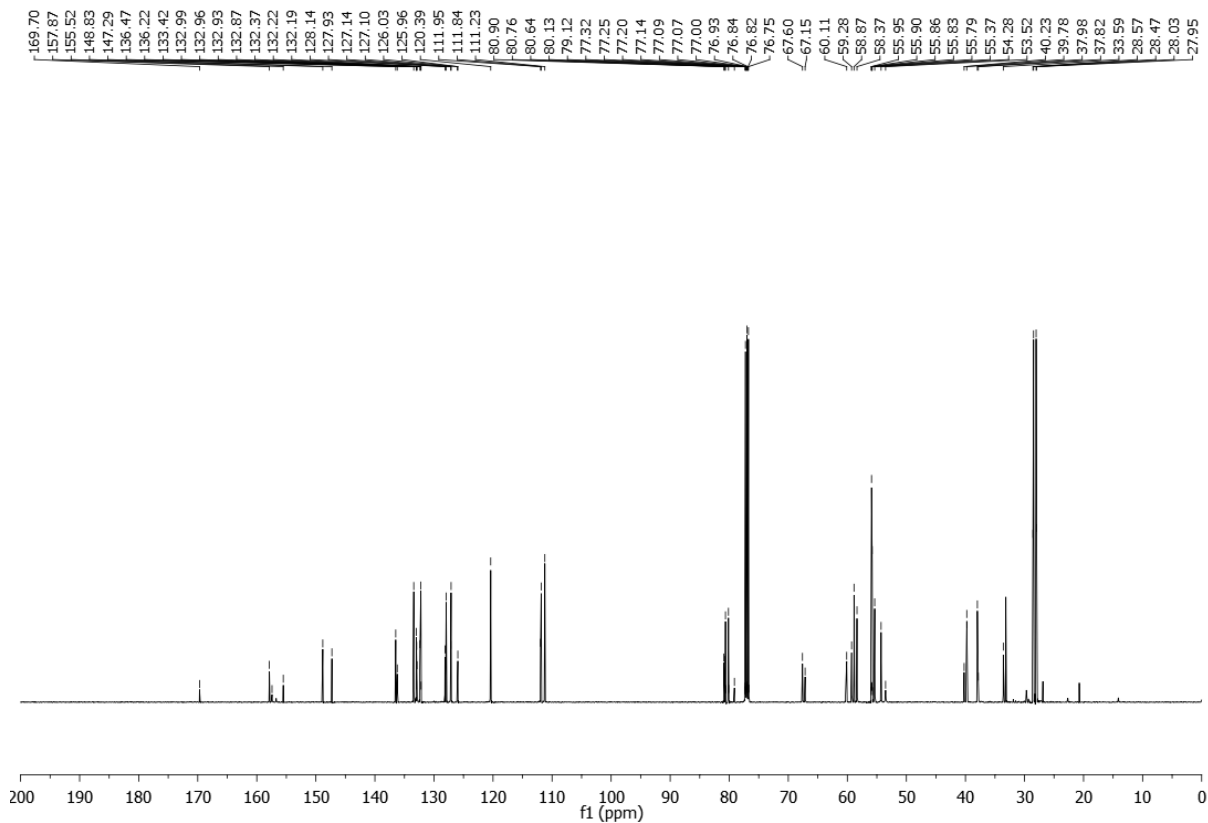

**<sup>1</sup>H NMR (500 MHz, CDCl<sub>3</sub>)**

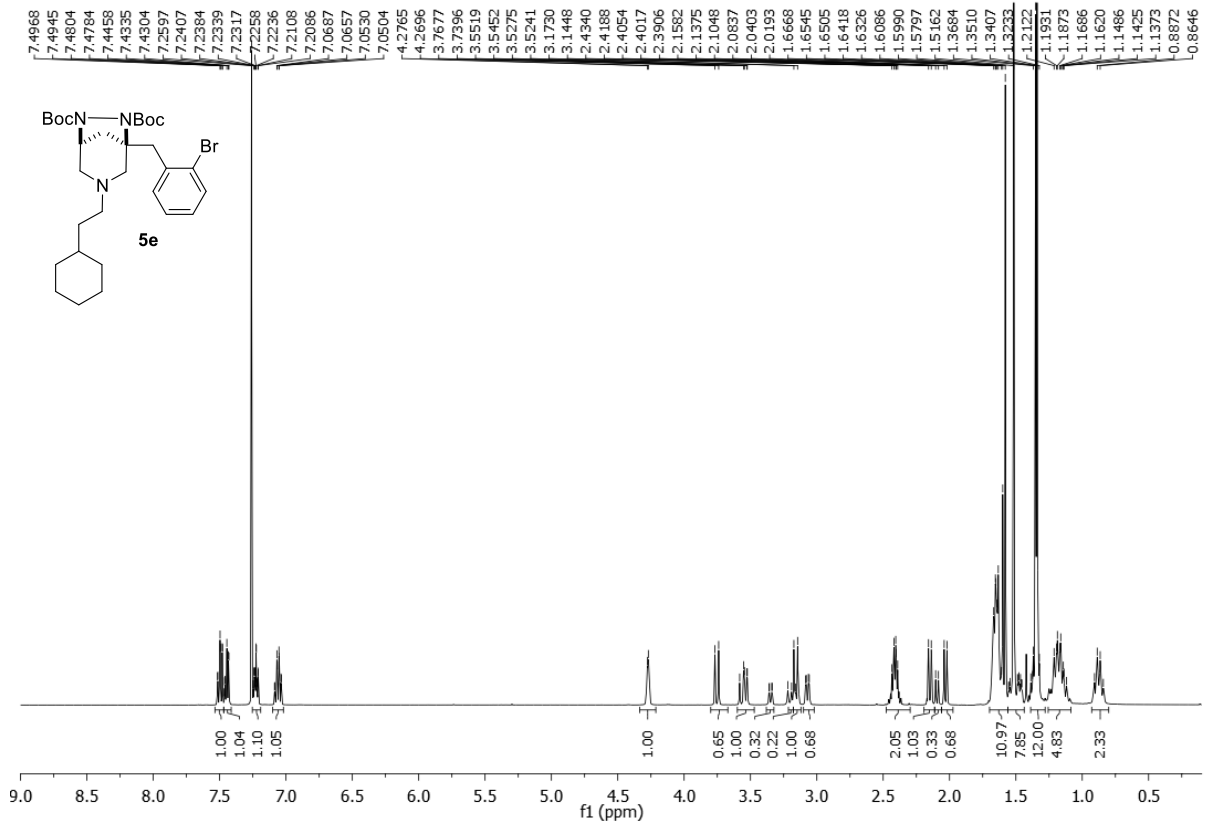

**<sup>13</sup>C{<sup>1</sup>H} NMR (126 MHz, CDCl<sub>3</sub>)**

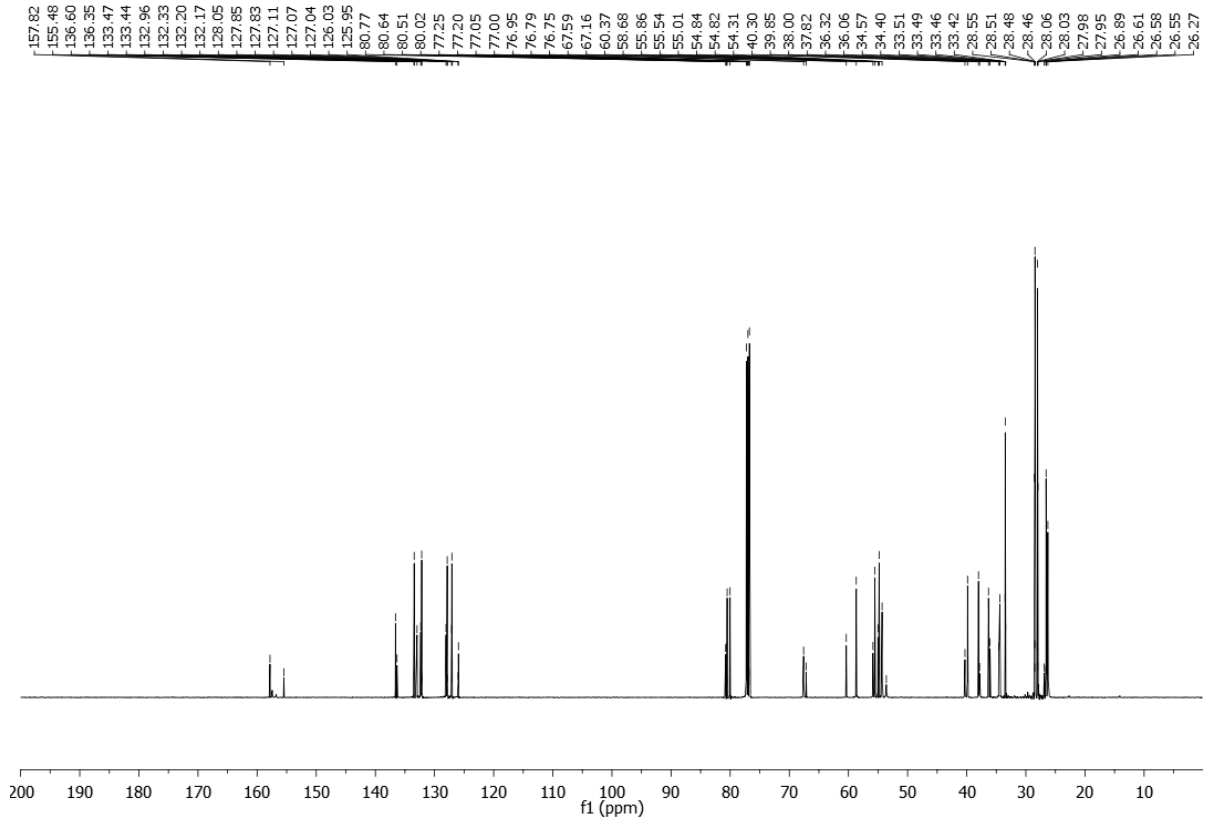

<sup>1</sup>H NMR (500 MHz, CDCl<sub>3</sub>)

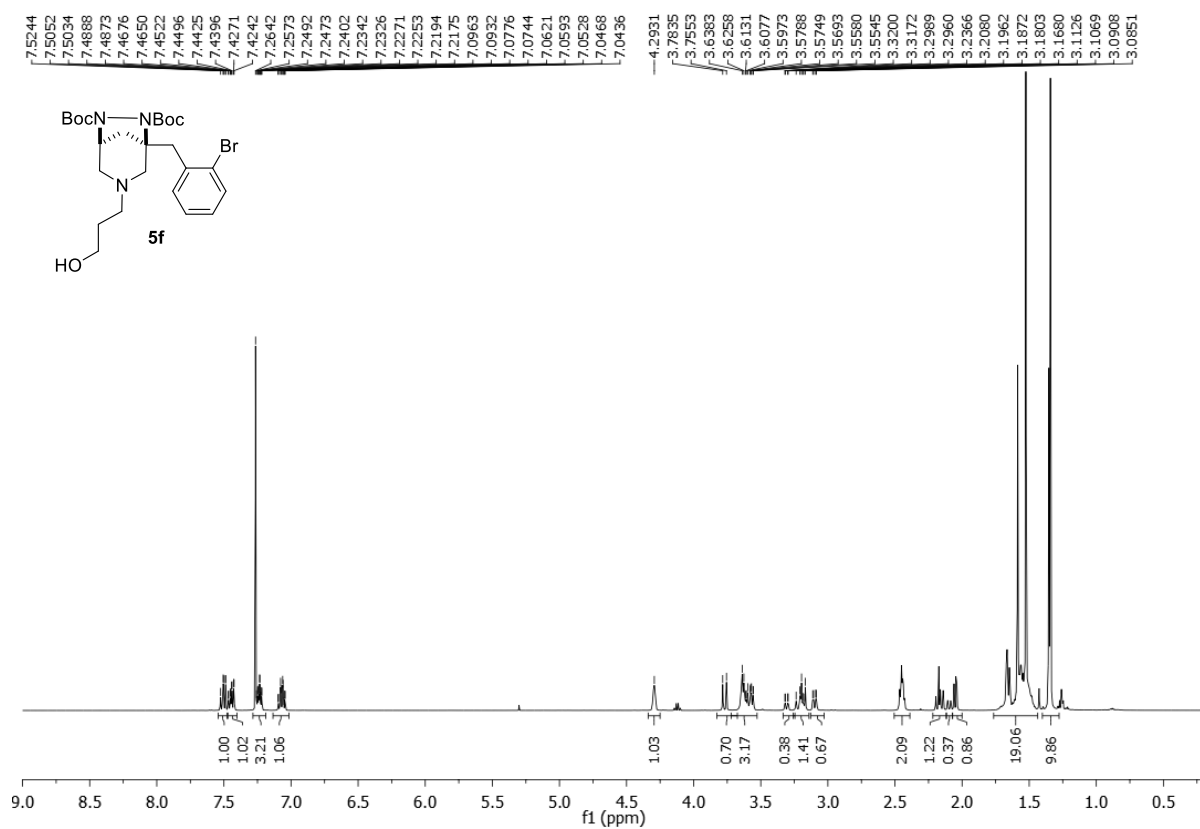

<sup>13</sup>C{<sup>1</sup>H} NMR (126 MHz, CDCl<sub>3</sub>)

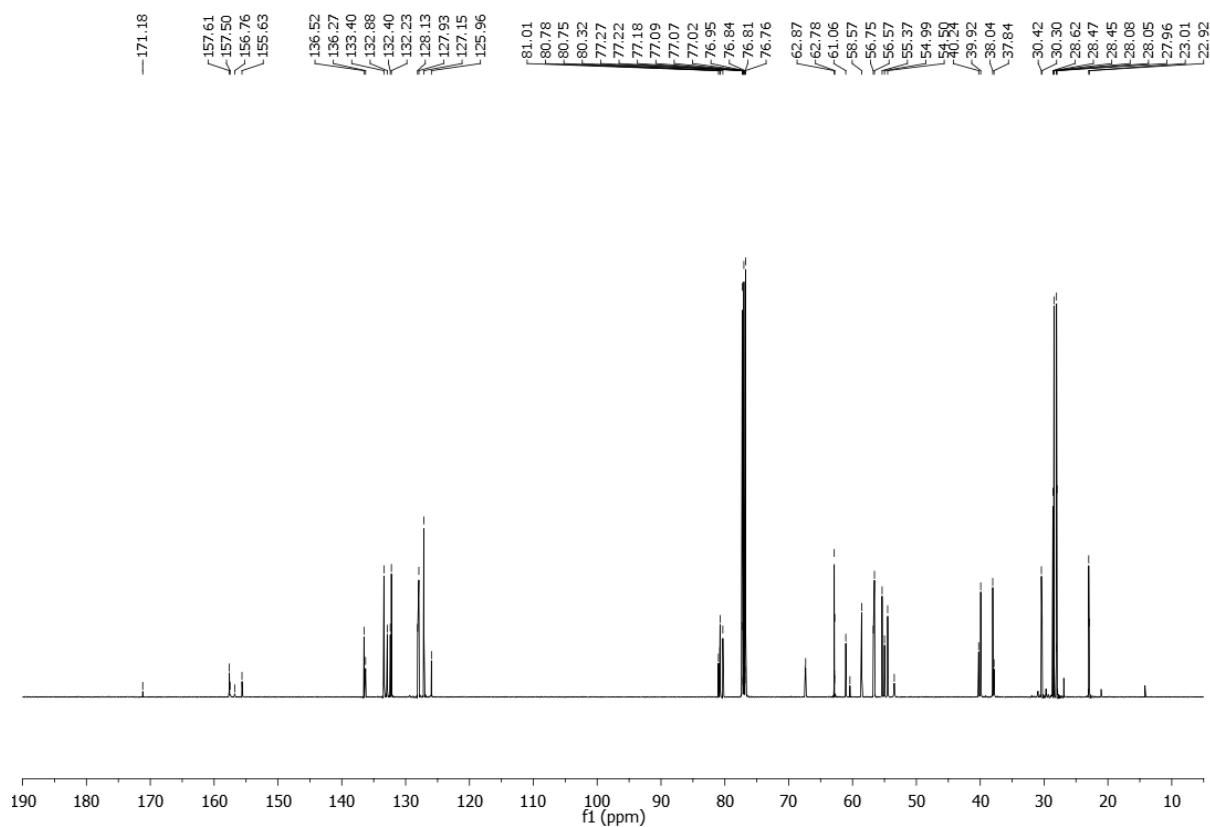

<sup>1</sup>H NMR (500 MHz, CDCl<sub>3</sub>)

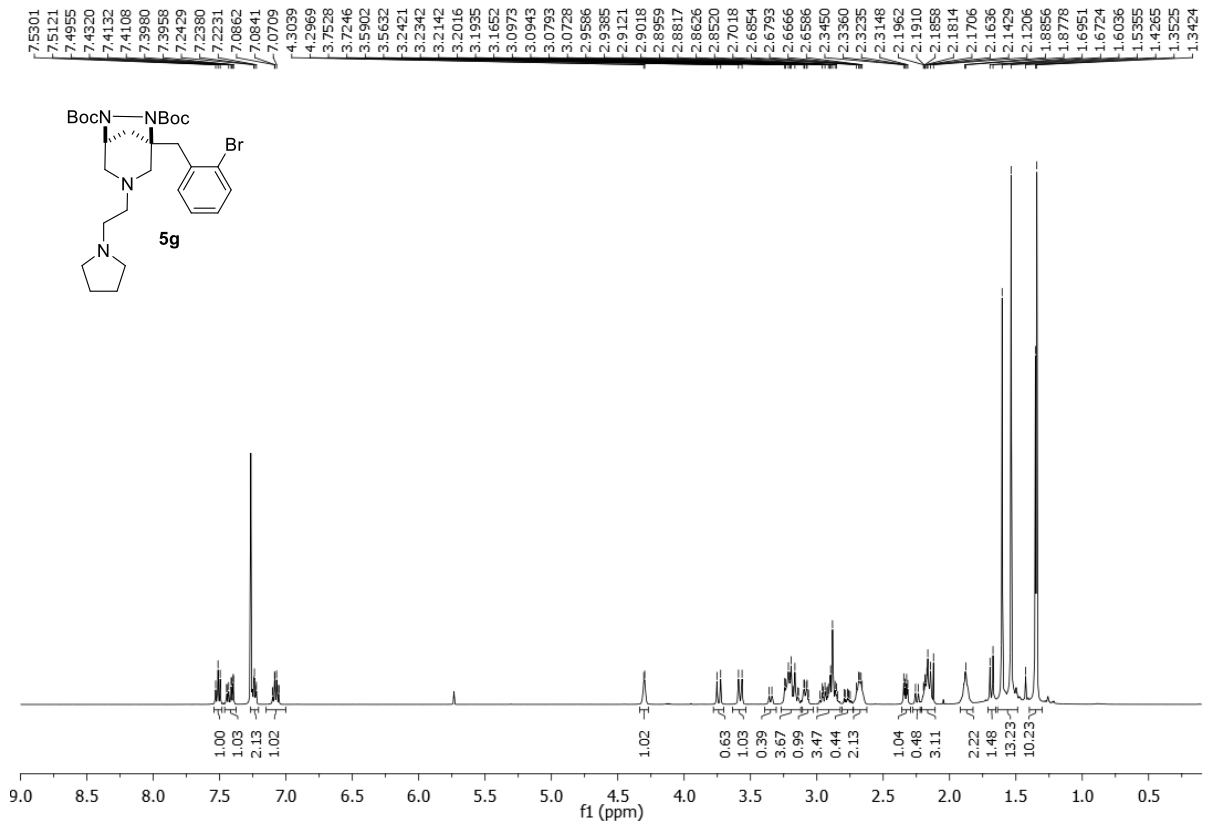

<sup>13</sup>C{<sup>1</sup>H} NMR (126 MHz, CDCl<sub>3</sub>)

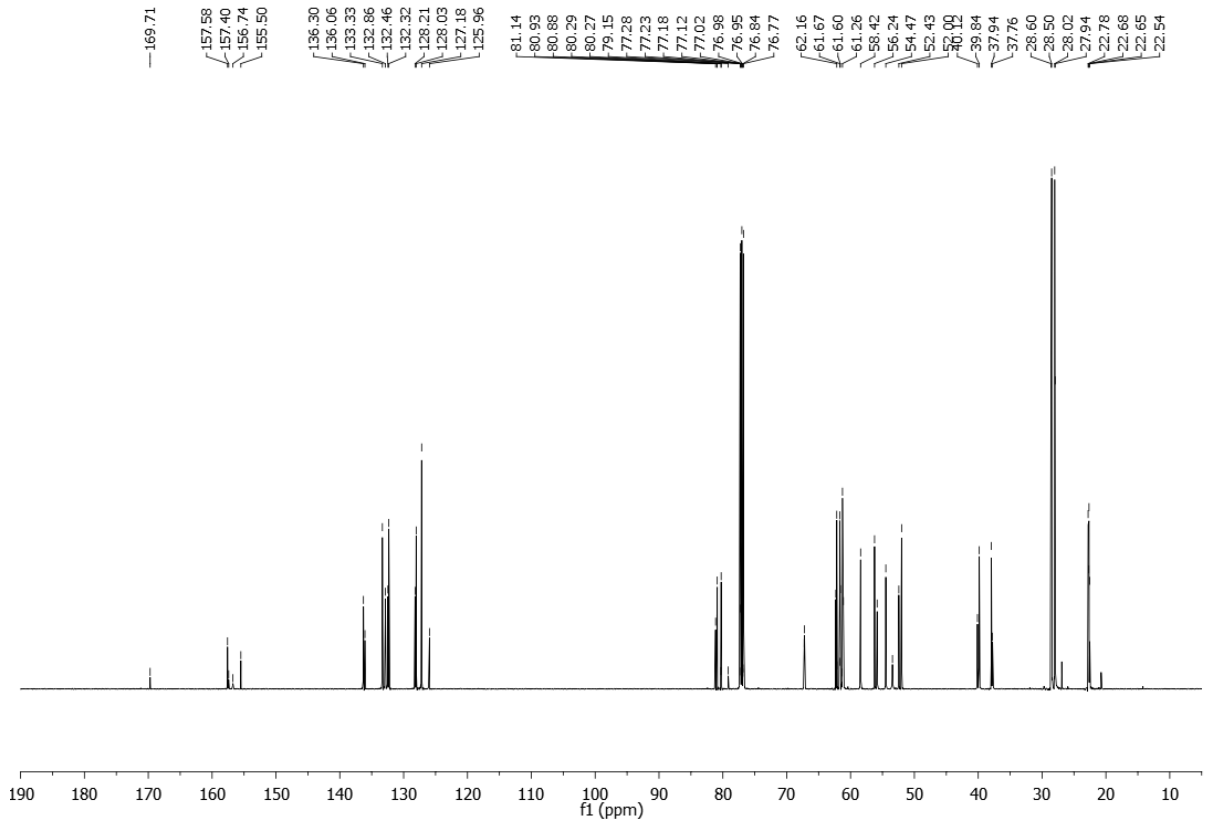



<sup>1</sup>H NMR (500 MHz, CDCl<sub>3</sub>)

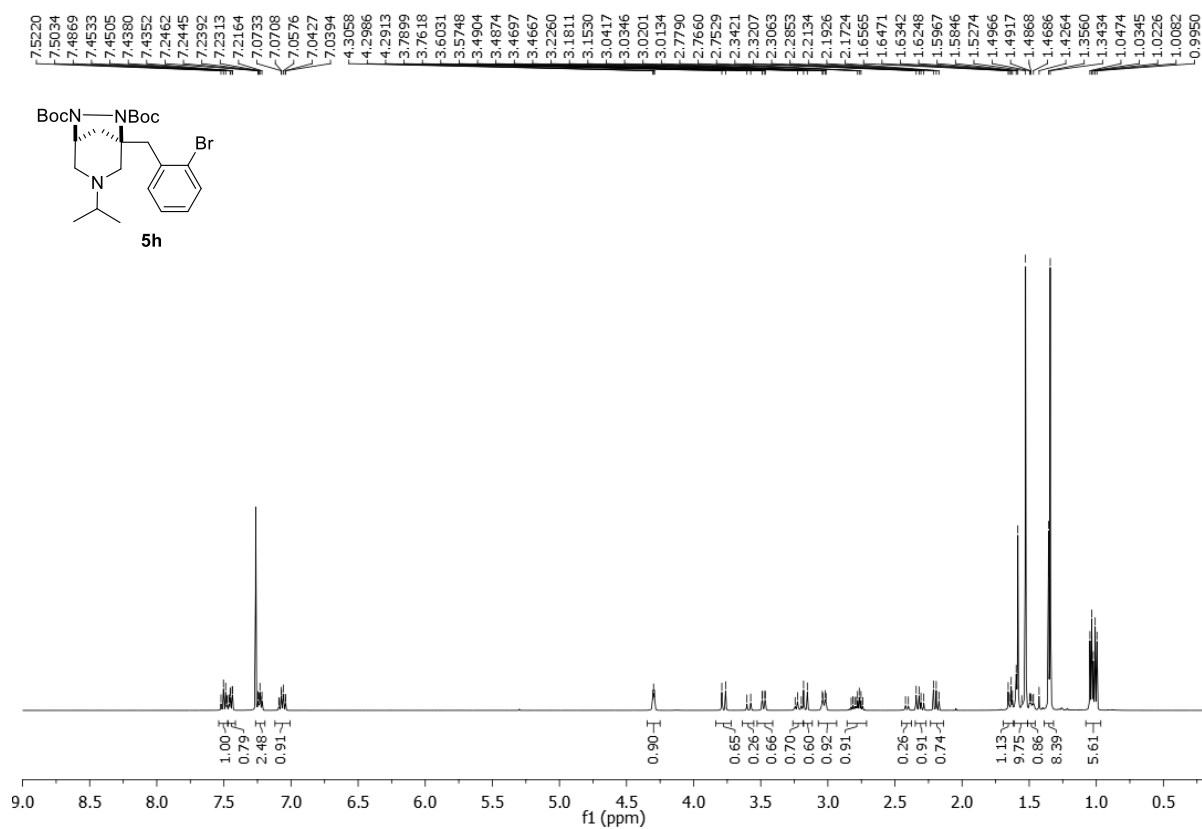

<sup>13</sup>C{<sup>1</sup>H} NMR (126 MHz, CDCl<sub>3</sub>)

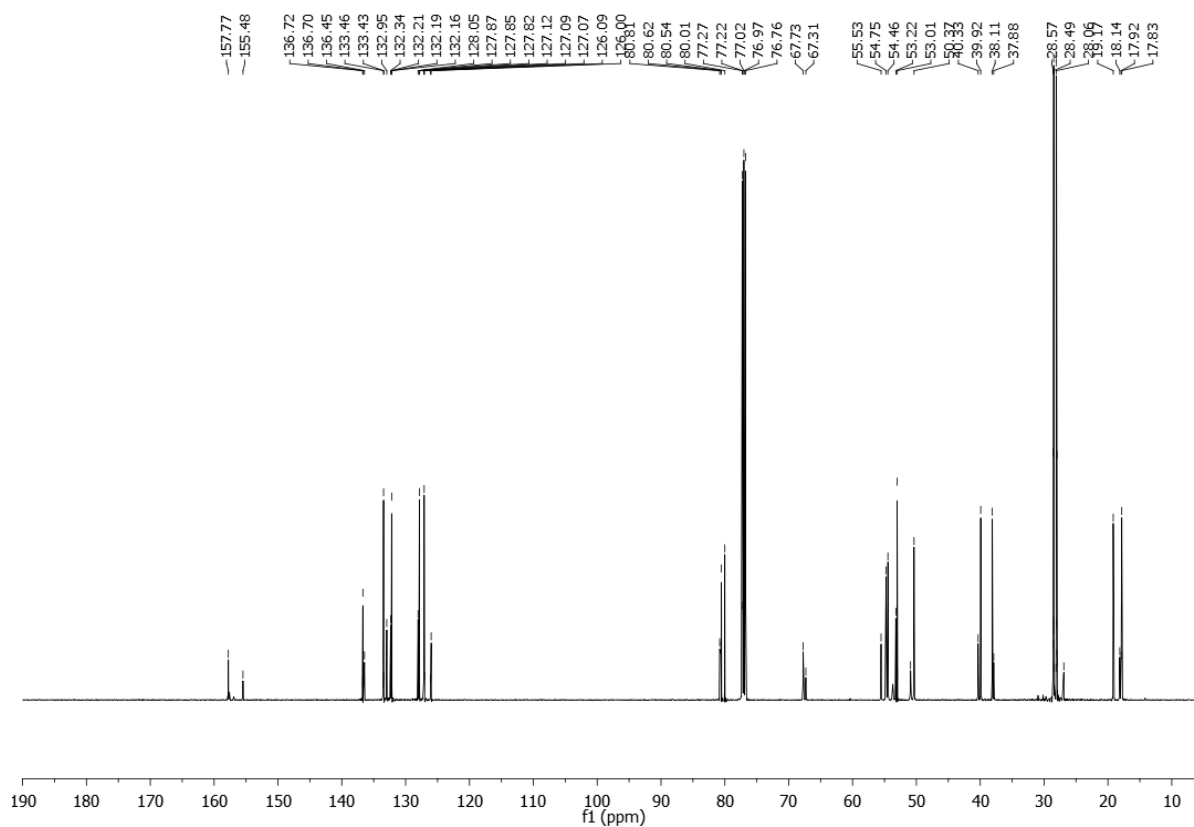

<sup>1</sup>H NMR (500 MHz, CDCl<sub>3</sub>)

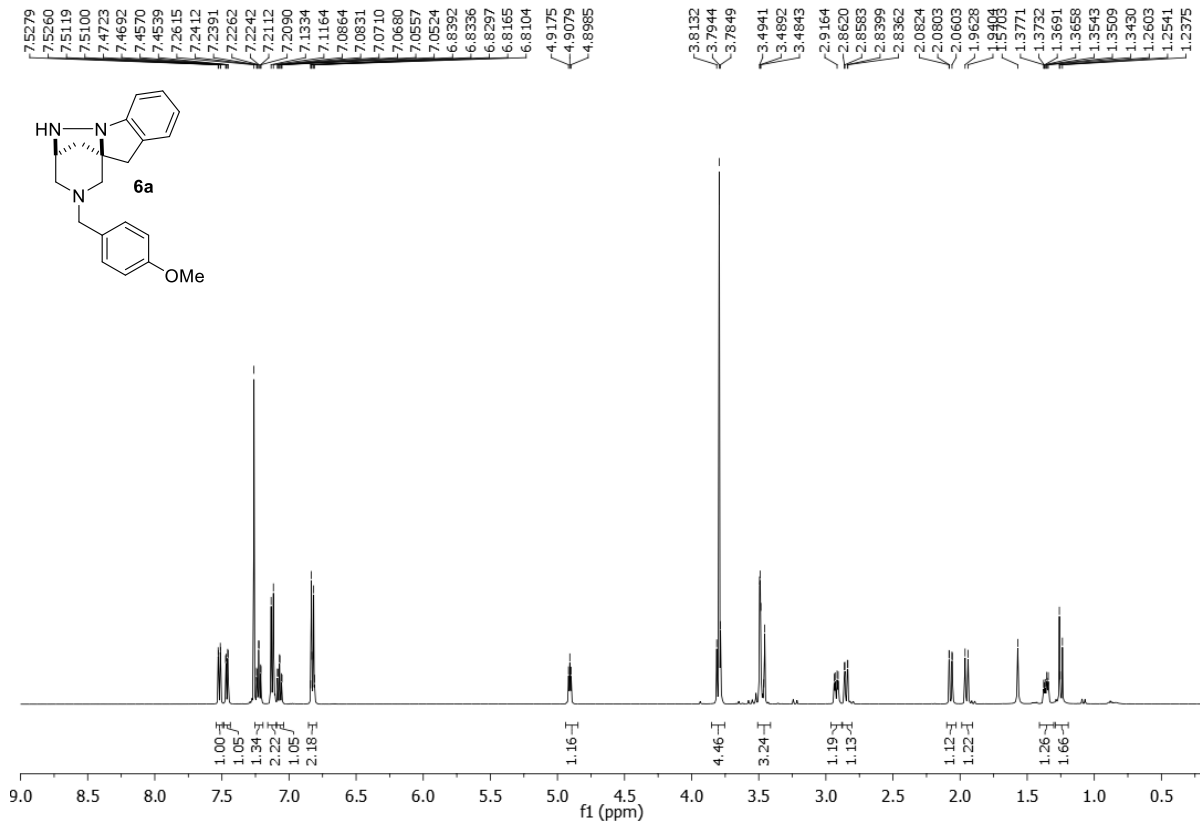

<sup>13</sup>C{<sup>1</sup>H} NMR (126 MHz, CDCl<sub>3</sub>)

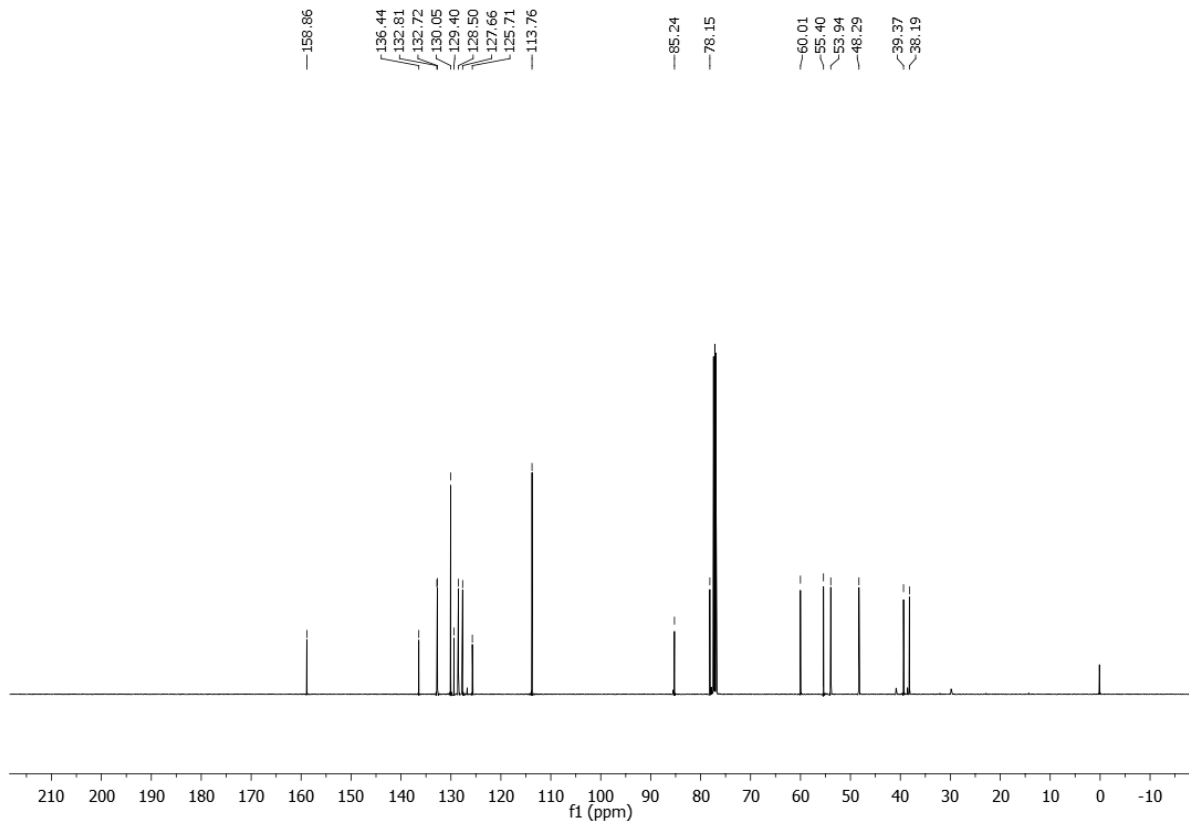

**<sup>1</sup>H NMR (500 MHz, CDCl<sub>3</sub>)**

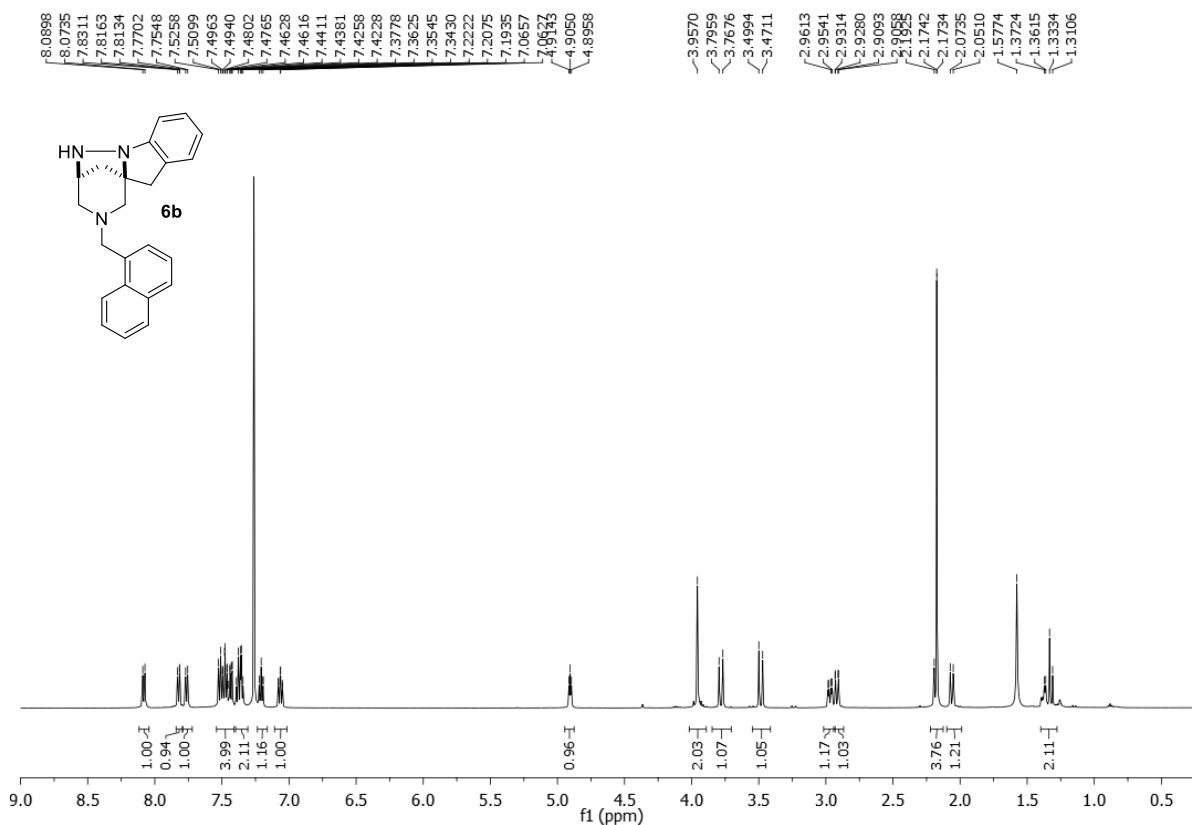

**<sup>13</sup>C{<sup>1</sup>H} NMR (126 MHz, CDCl<sub>3</sub>)**

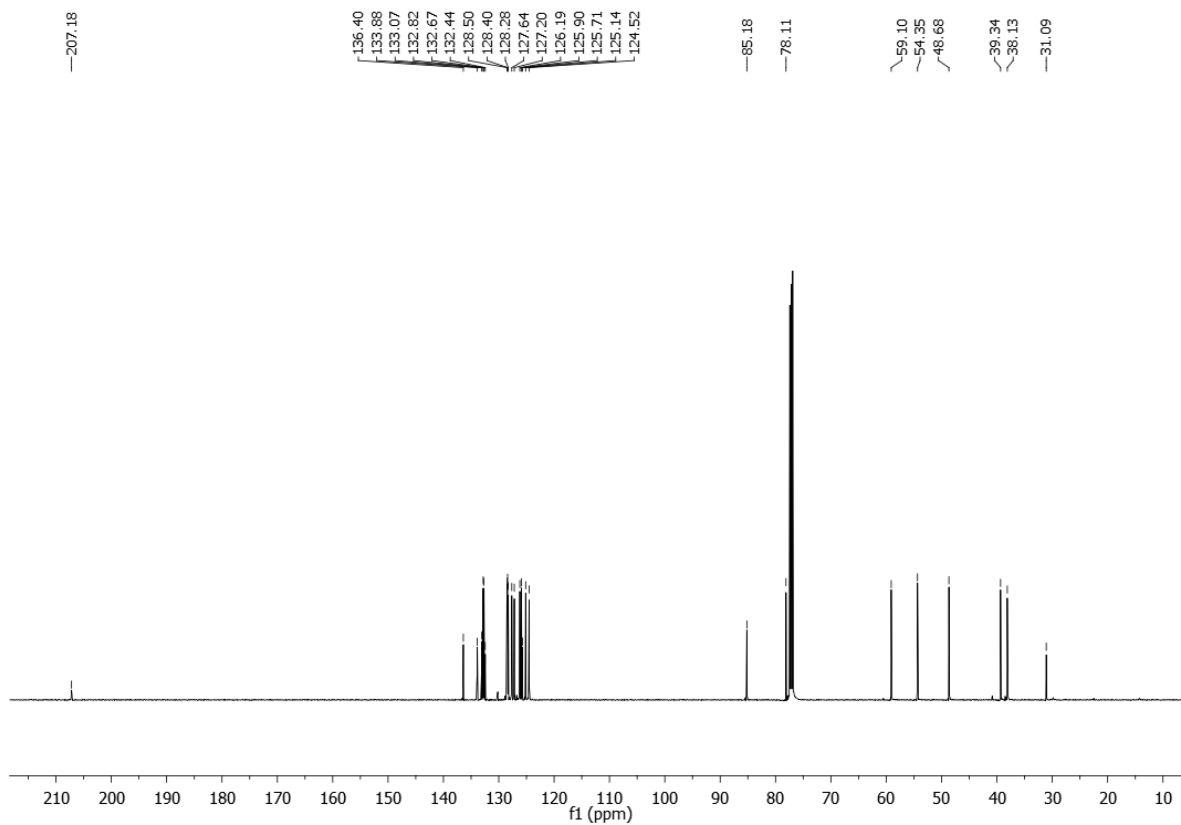

<sup>1</sup>H NMR (500 MHz, CDCl<sub>3</sub>)

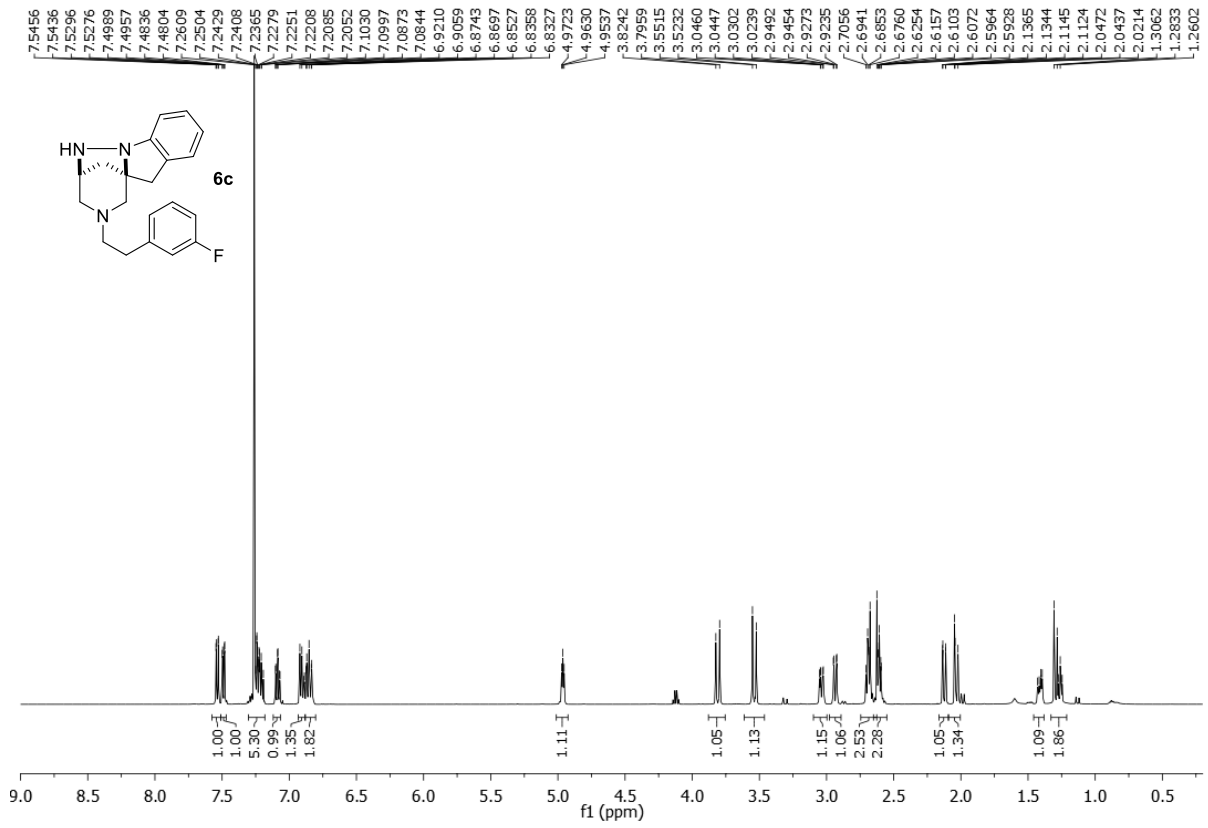

<sup>13</sup>C{<sup>1</sup>H} NMR (126 MHz, CDCl<sub>3</sub>)

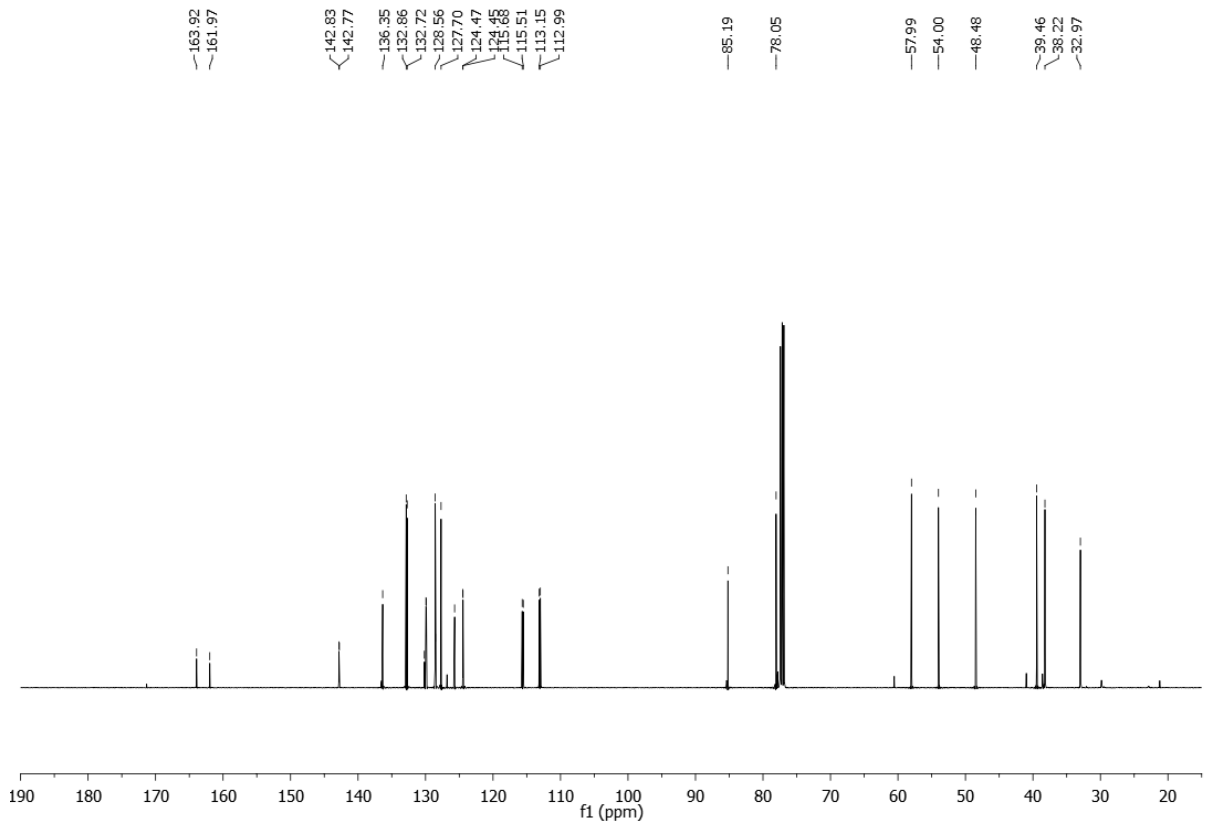

$^{19}\text{F}$  NMR (471 MHz,  $\text{CDCl}_3$ )

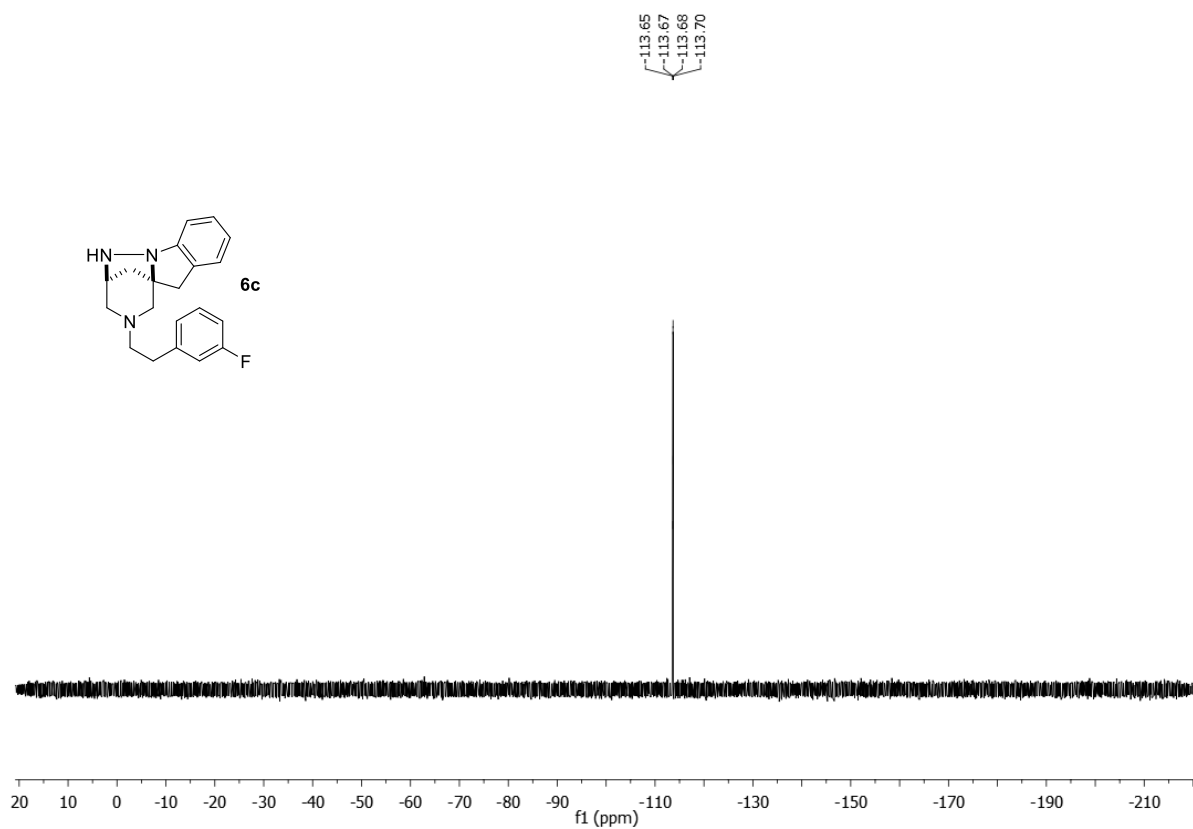

<sup>1</sup>H NMR (500 MHz, CD<sub>3</sub>OD)

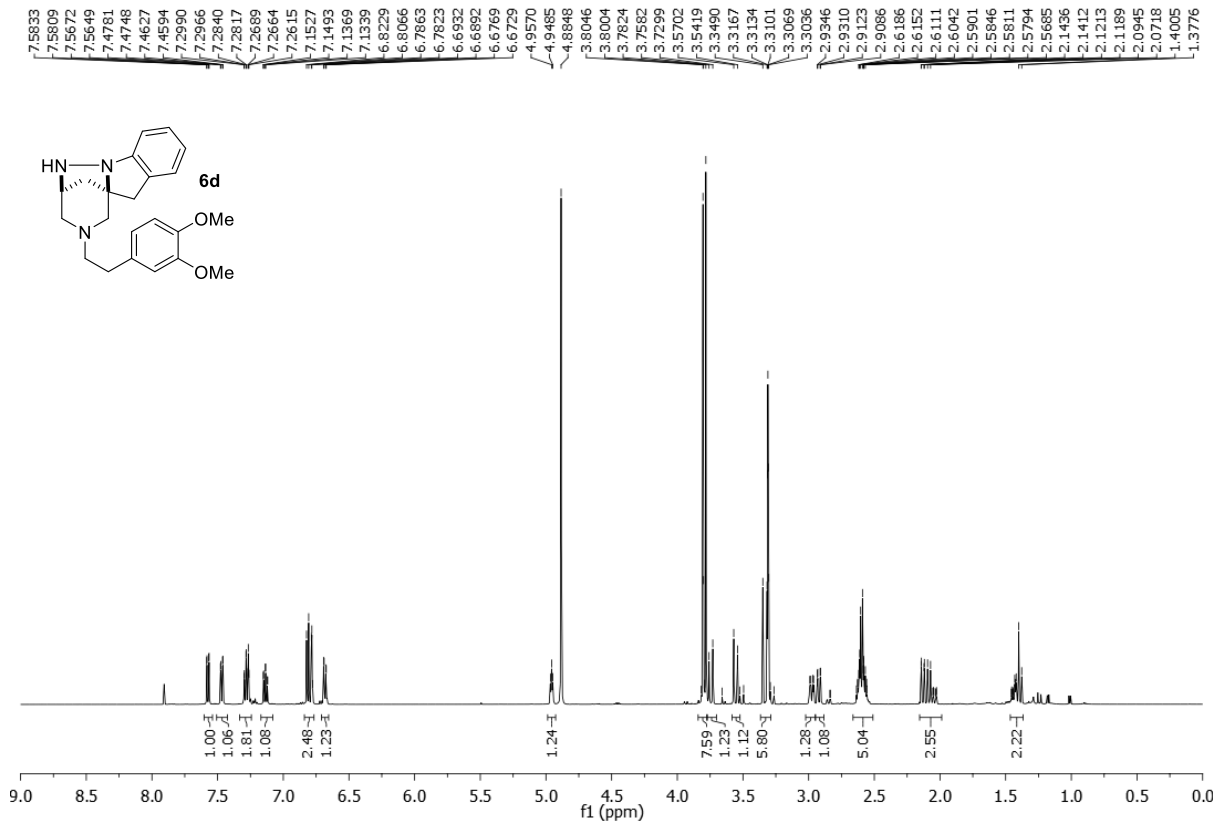

<sup>13</sup>C{<sup>1</sup>H} NMR (126 MHz, CD<sub>3</sub>OD)

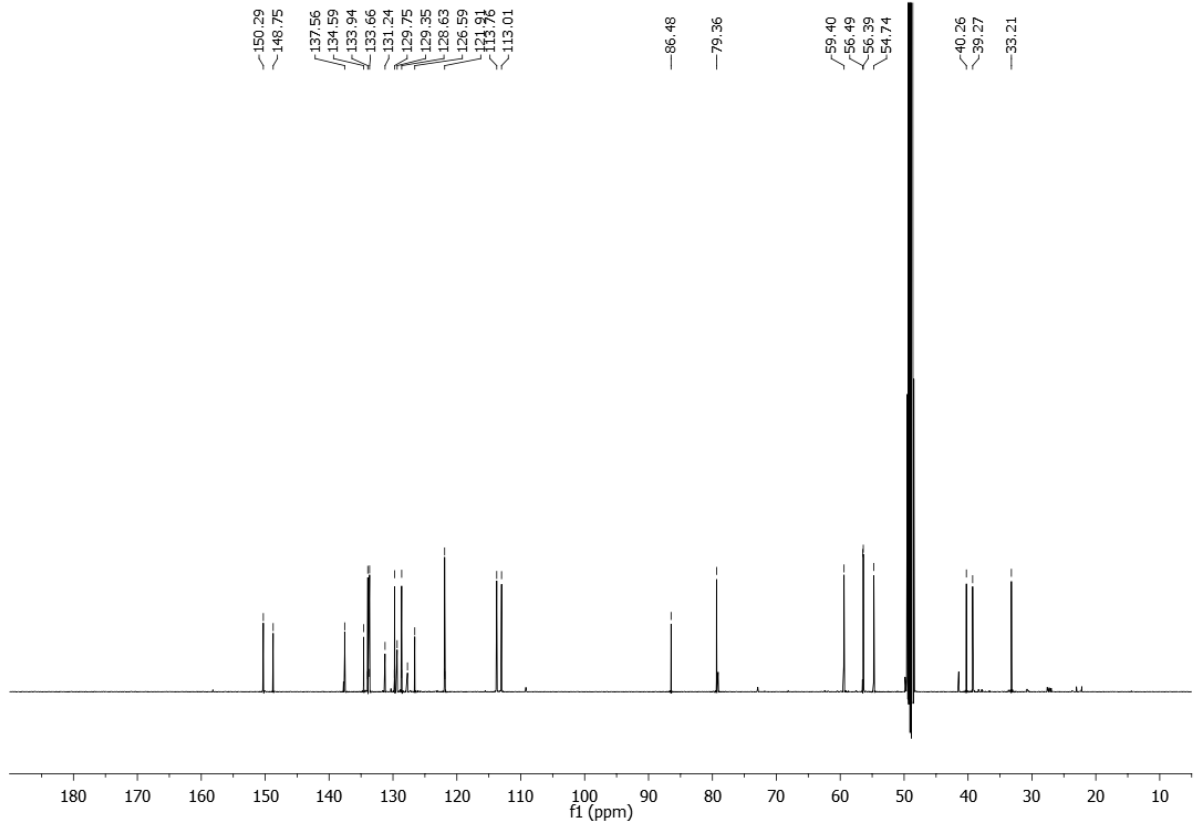

<sup>1</sup>H NMR (500 MHz, CDCl<sub>3</sub>)

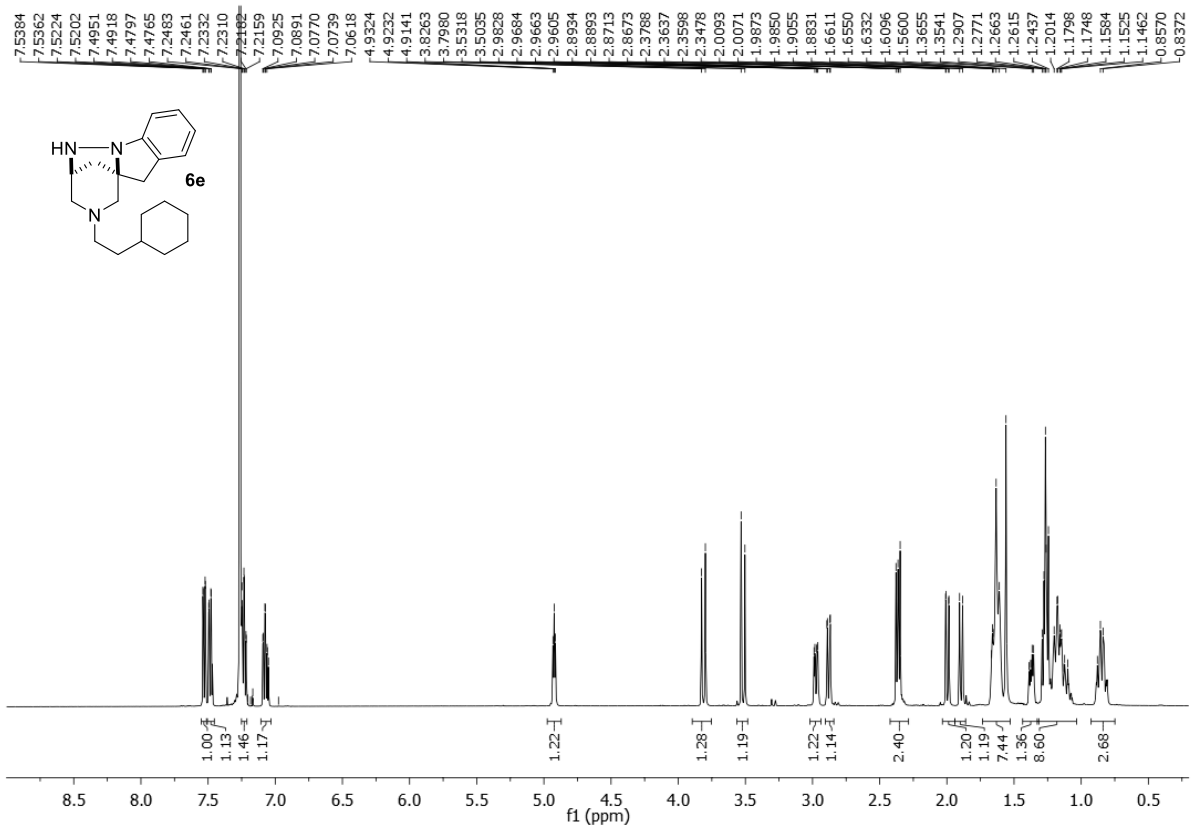

<sup>13</sup>C{<sup>1</sup>H} NMR (126 MHz, CDCl<sub>3</sub>)

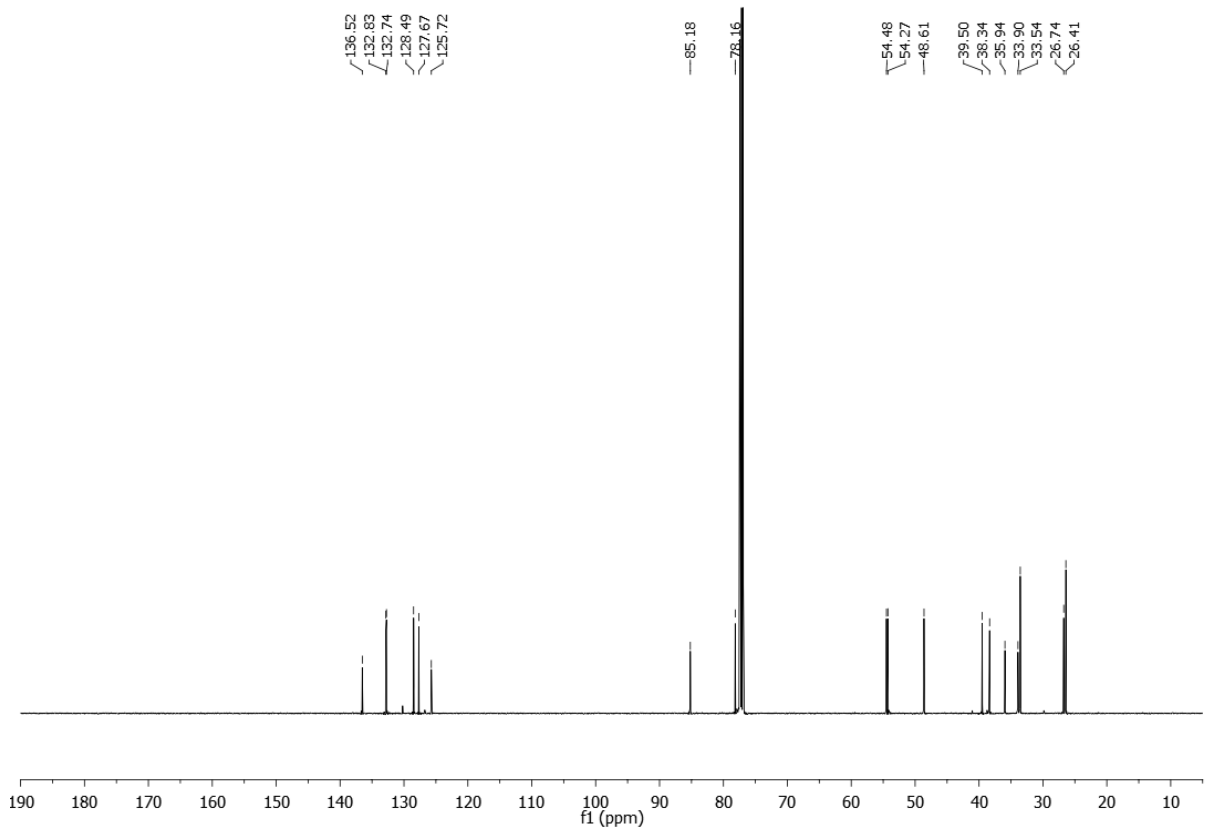

<sup>1</sup>H NMR (500 MHz, CDCl<sub>3</sub>)

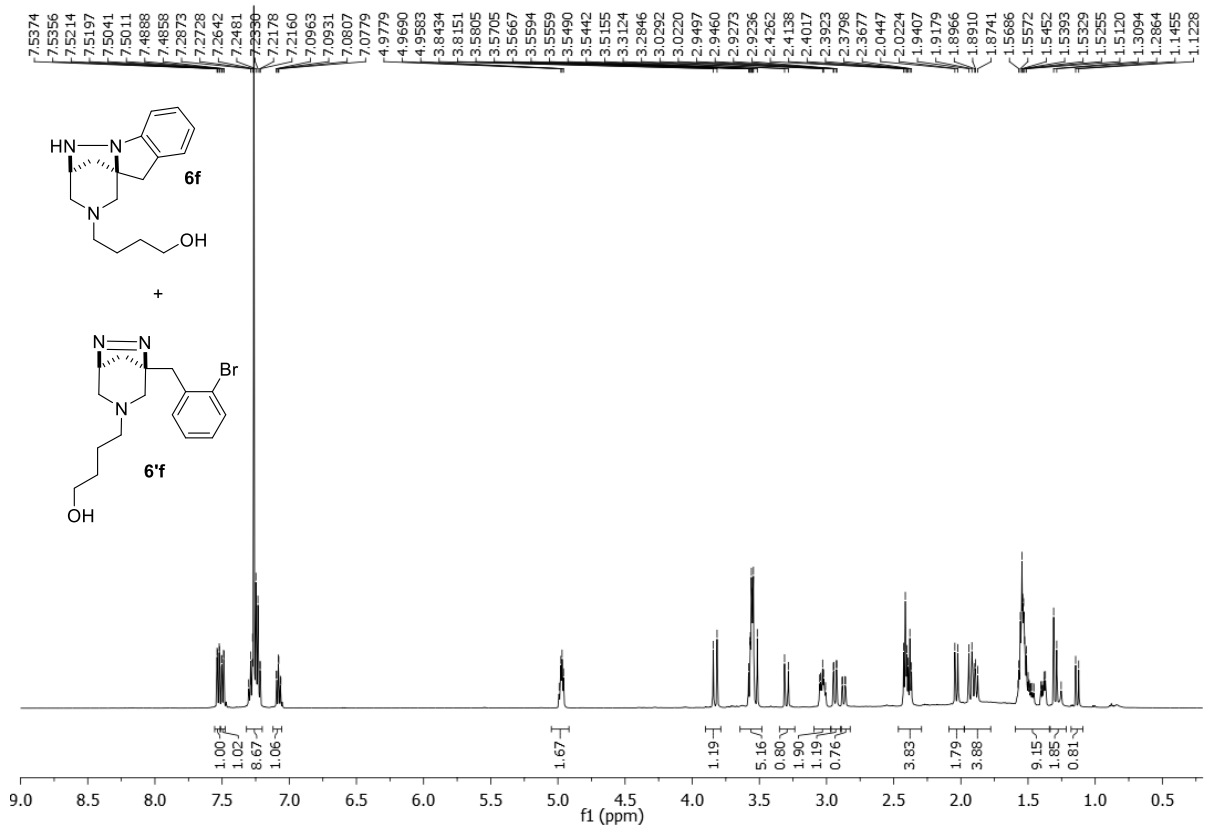

<sup>13</sup>C{<sup>1</sup>H} NMR (126 MHz, CDCl<sub>3</sub>)

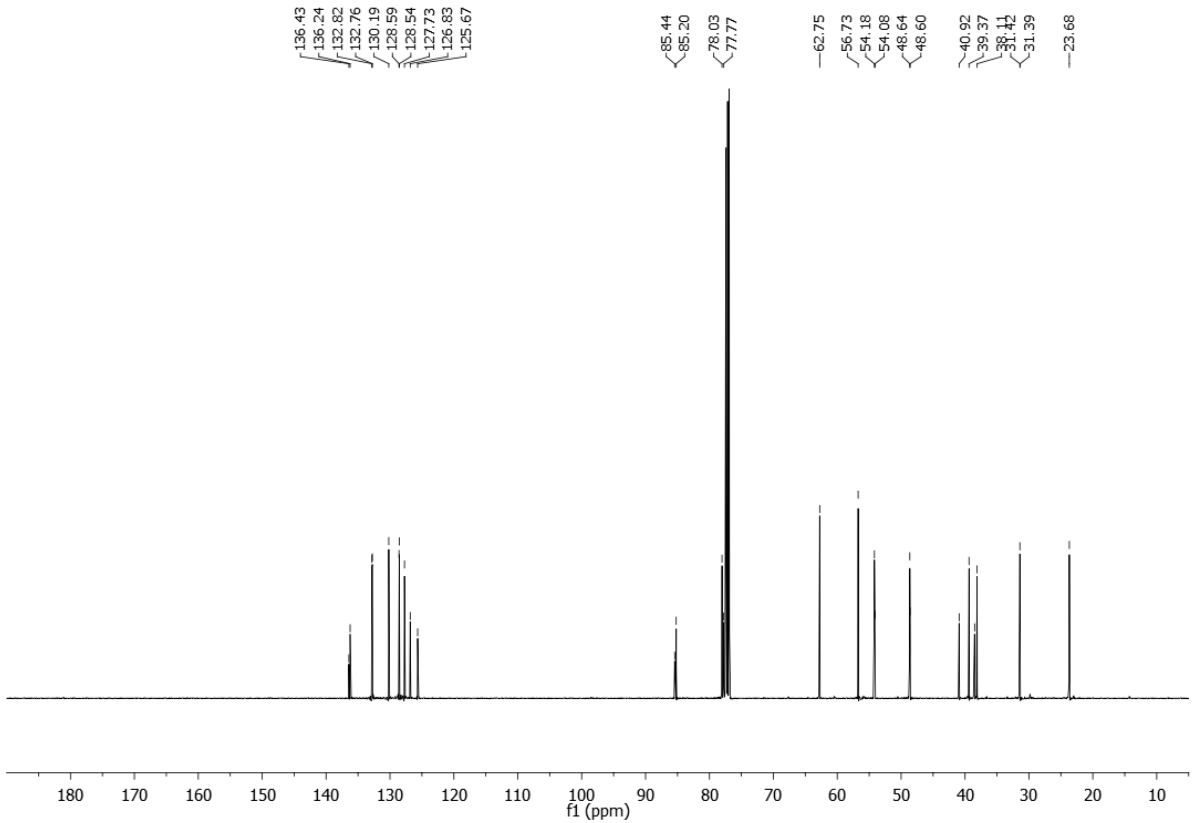



<sup>1</sup>H NMR (500 MHz, CDCl<sub>3</sub>)

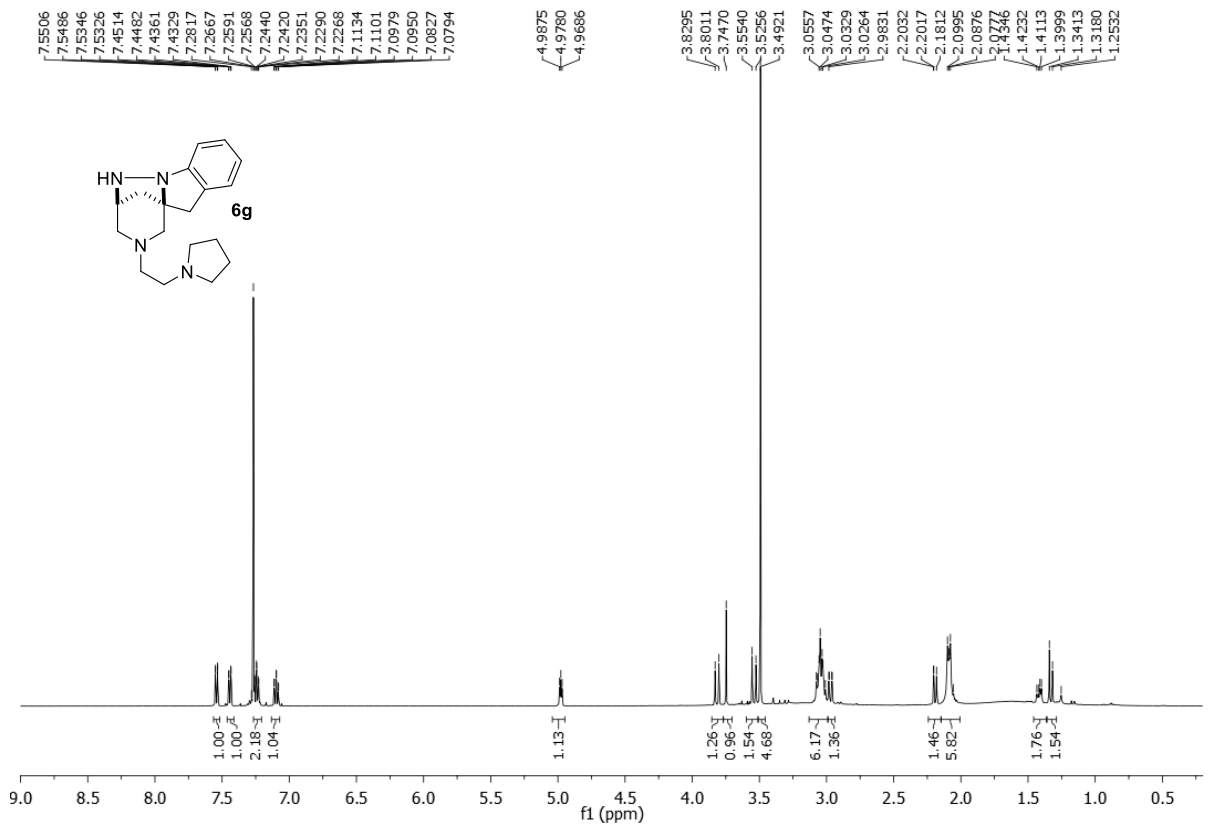

<sup>13</sup>C{<sup>1</sup>H} NMR (126 MHz, CDCl<sub>3</sub>)

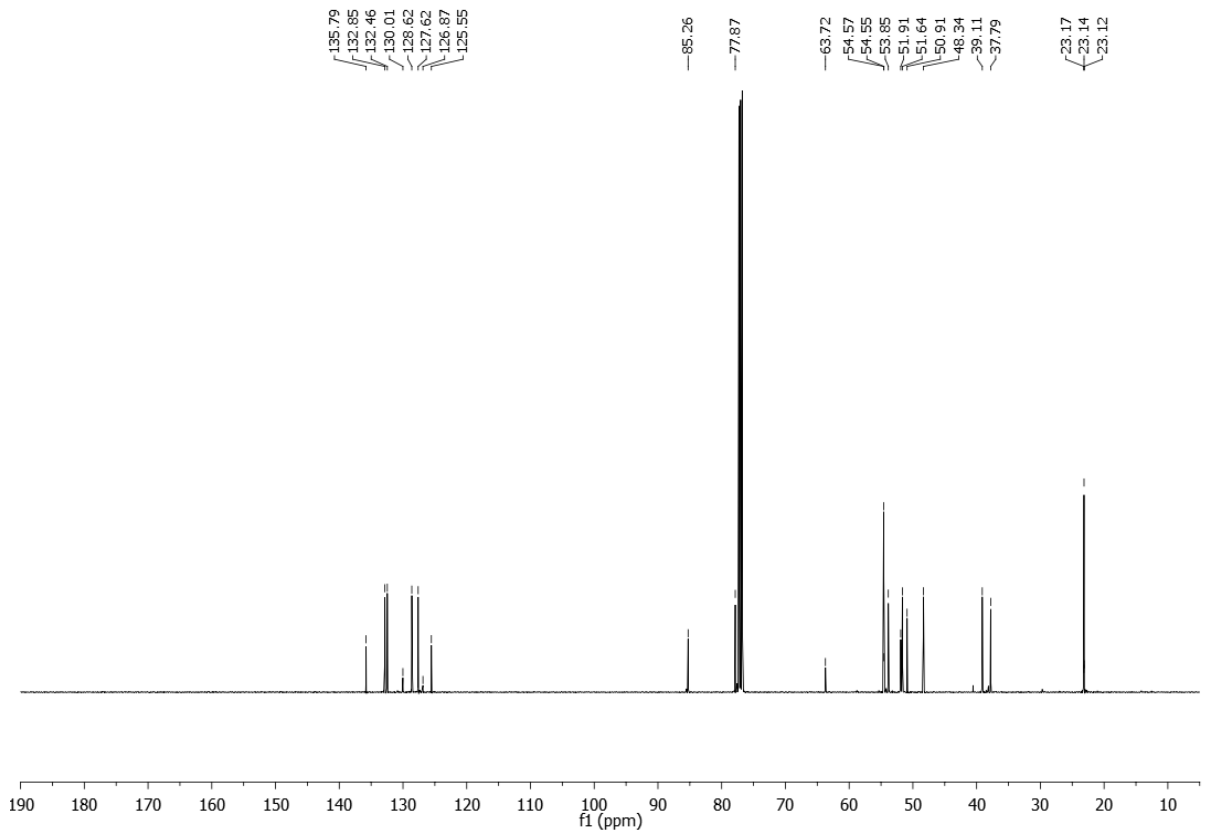

<sup>1</sup>H NMR (500 MHz, CDCl<sub>3</sub>)

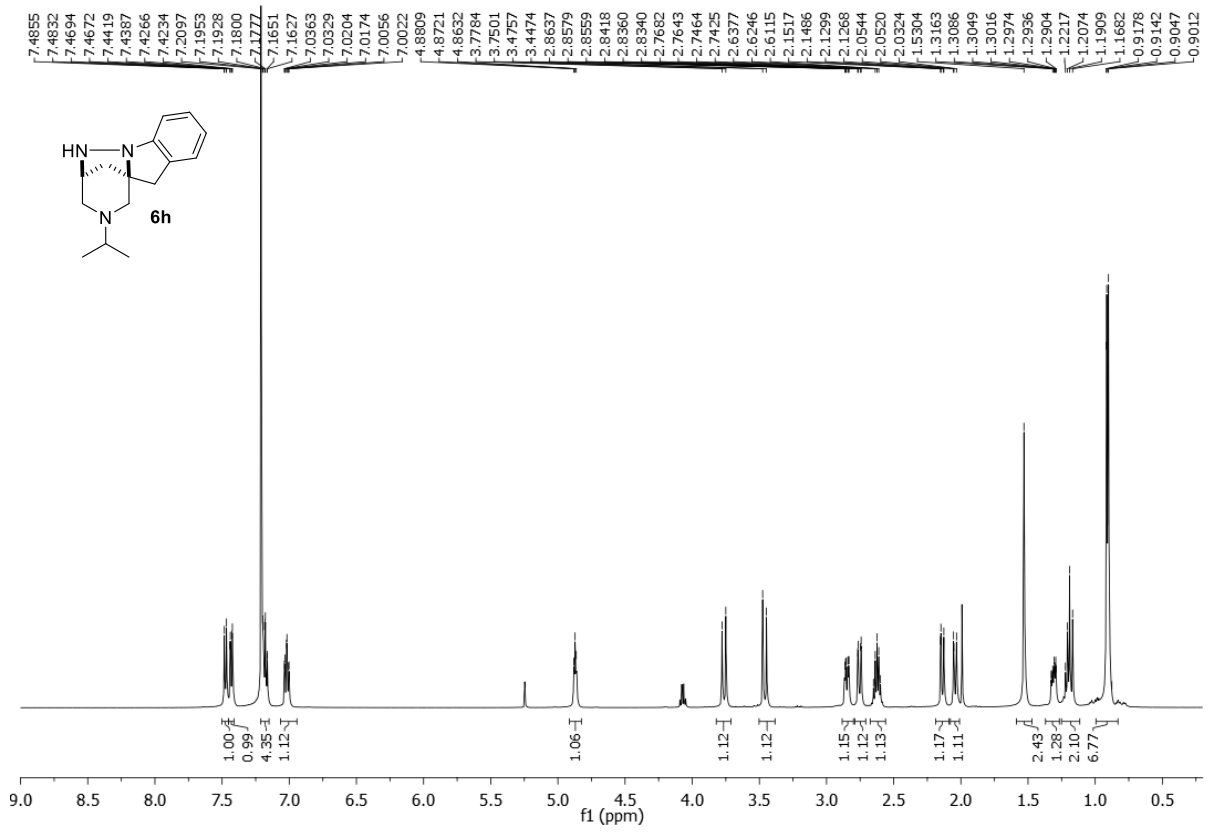

<sup>13</sup>C{<sup>1</sup>H} NMR (126 MHz, CDCl<sub>3</sub>)

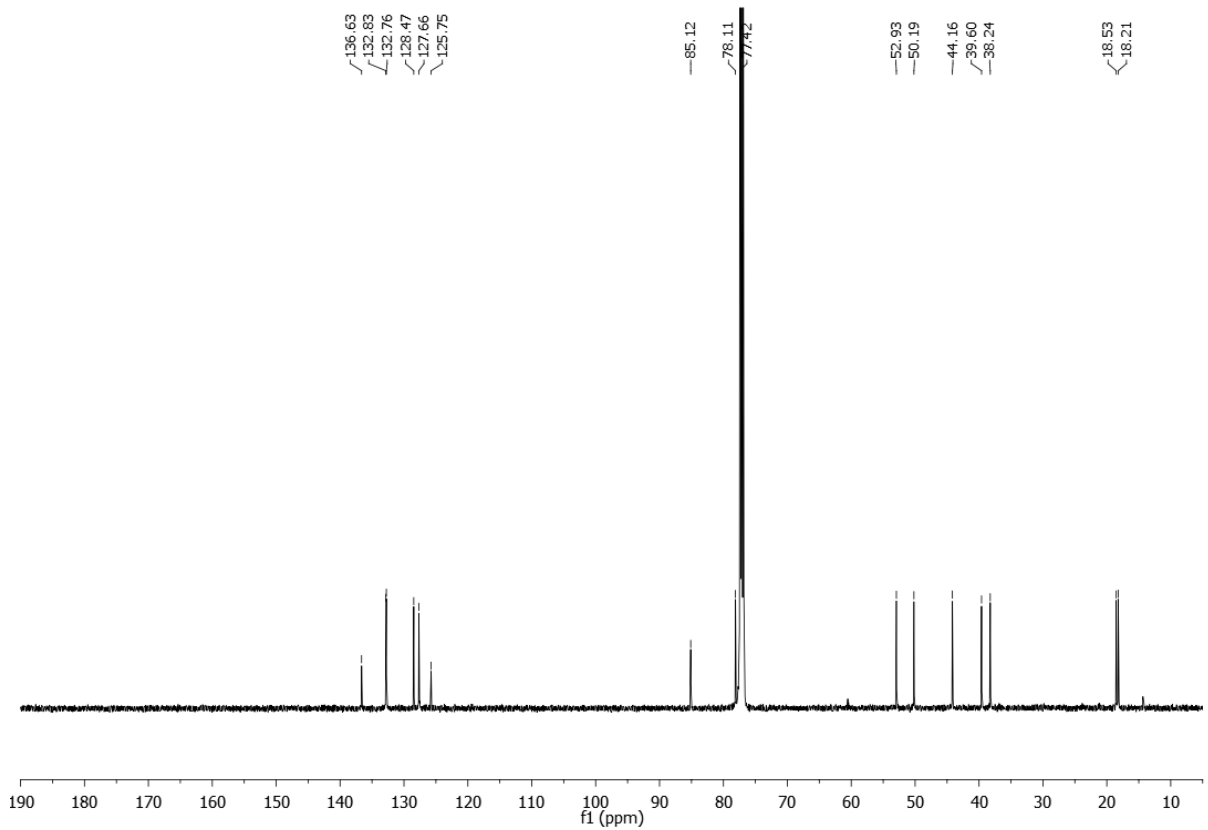

<sup>1</sup>H NMR (500 MHz, CDCl<sub>3</sub>)

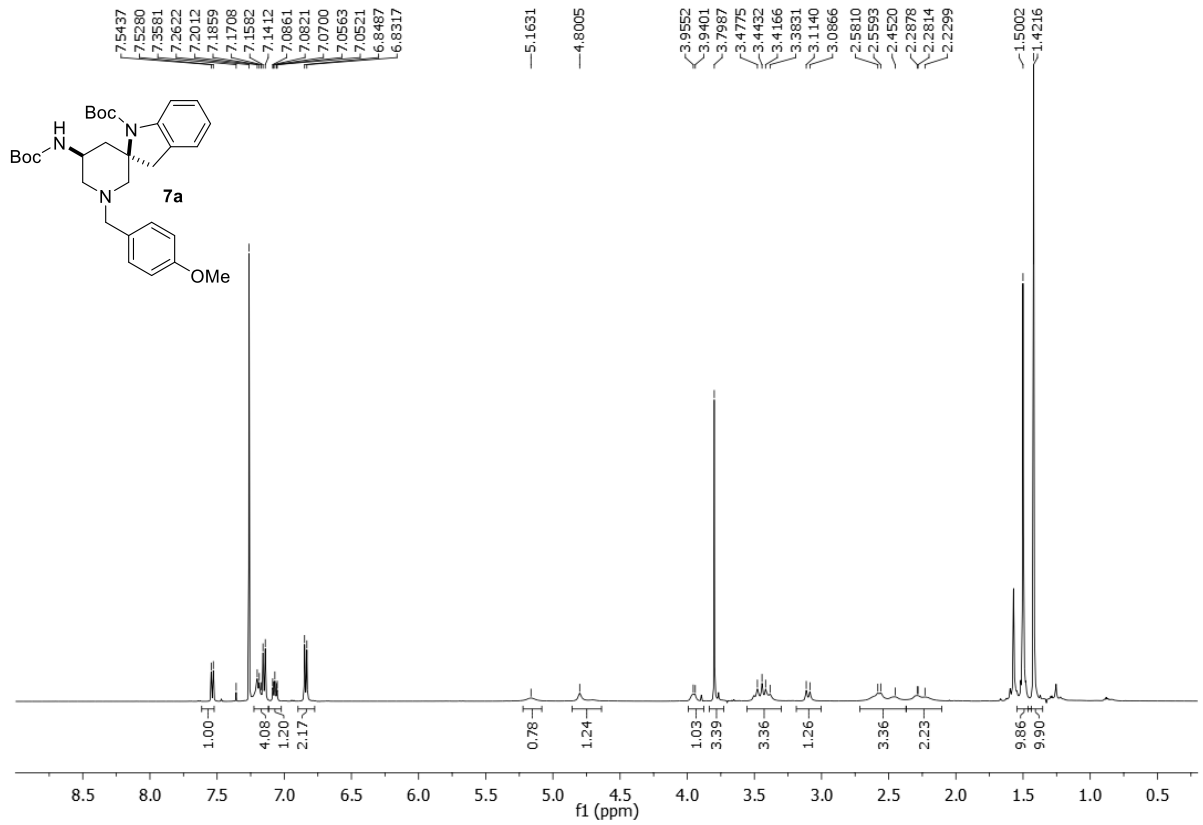

<sup>13</sup>C{<sup>1</sup>H} NMR (126 MHz, CDCl<sub>3</sub>)

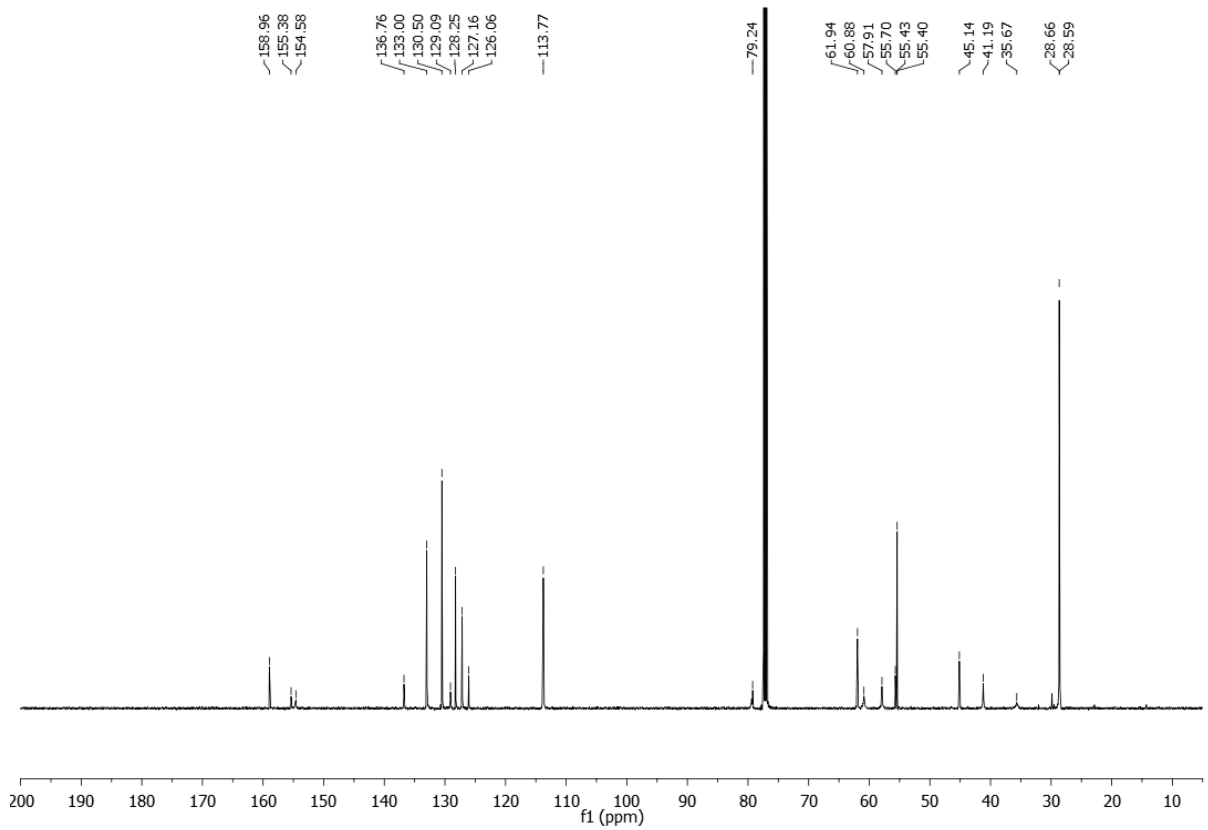

<sup>1</sup>H NMR (500 MHz, CDCl<sub>3</sub>)

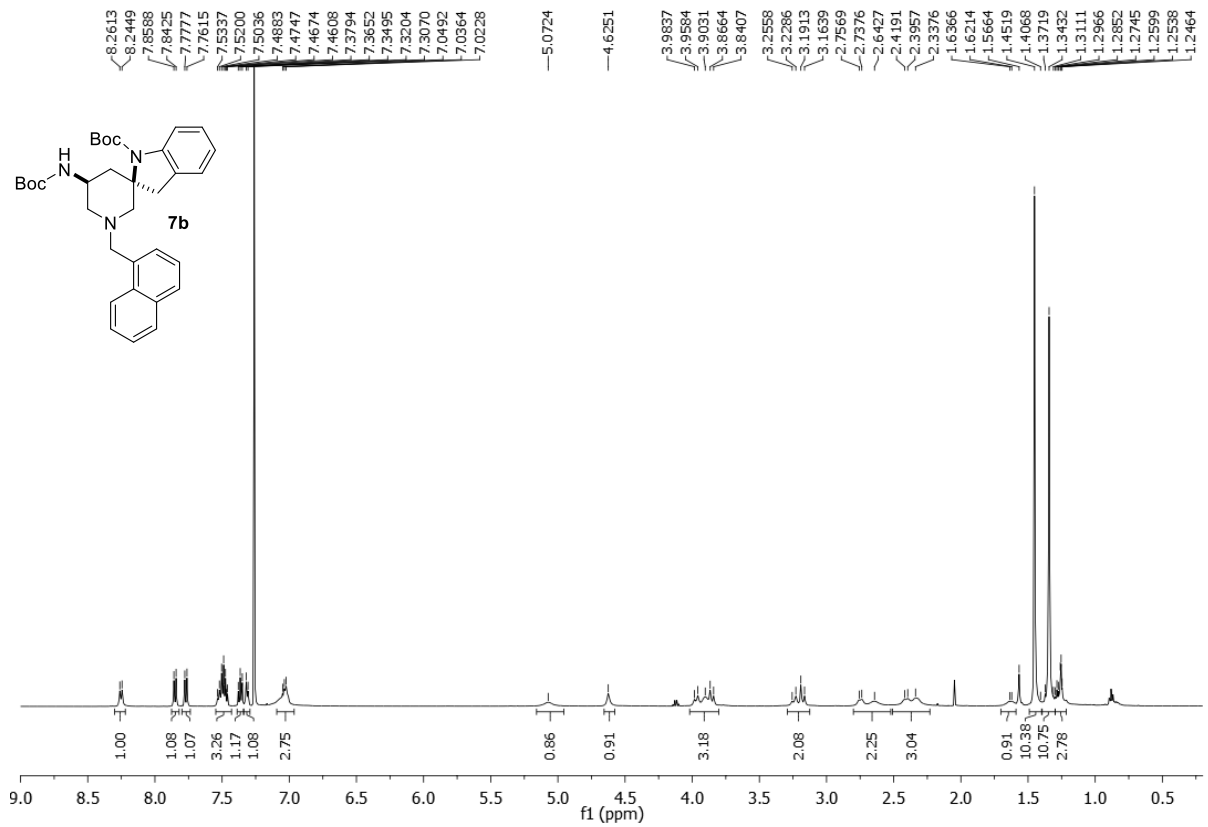

<sup>13</sup>C{<sup>1</sup>H} NMR (126 MHz, CDCl<sub>3</sub>)

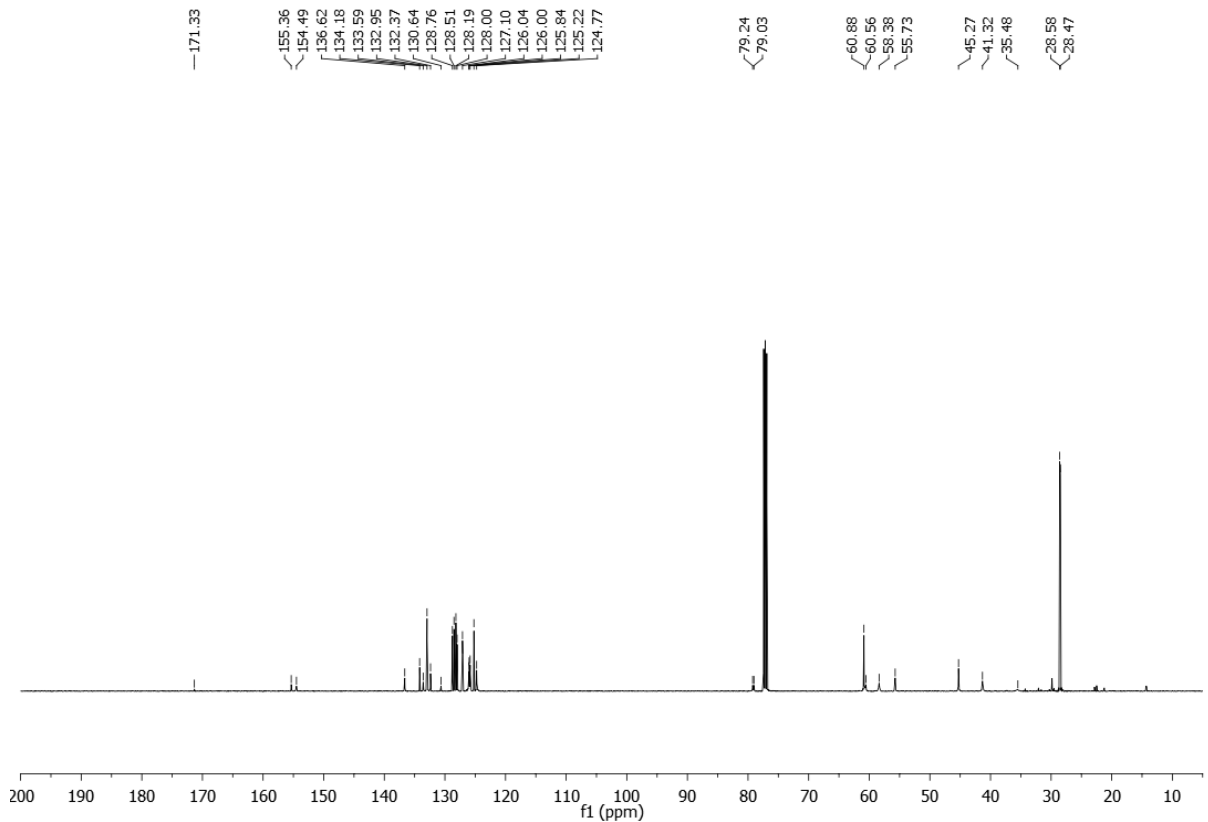

<sup>1</sup>H NMR (500 MHz, CDCl<sub>3</sub>)

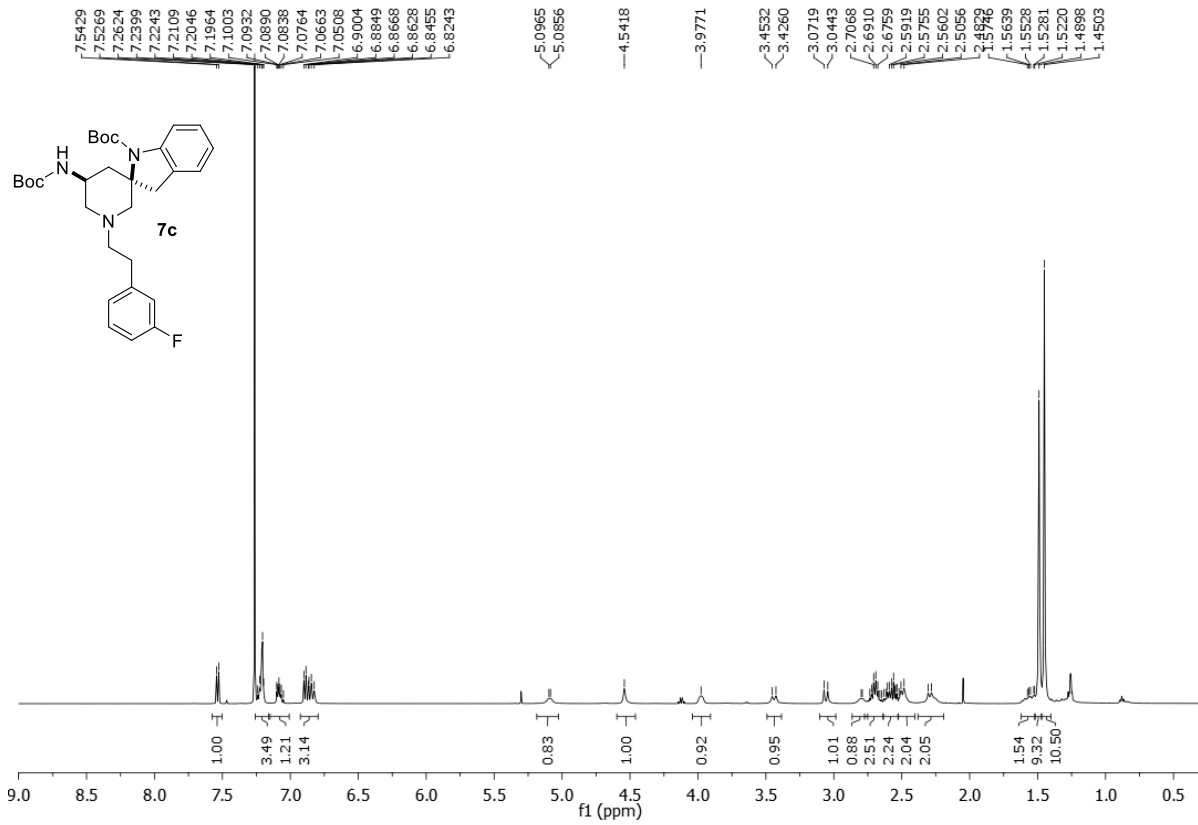

<sup>13</sup>C{<sup>1</sup>H} NMR (126 MHz, CDCl<sub>3</sub>)

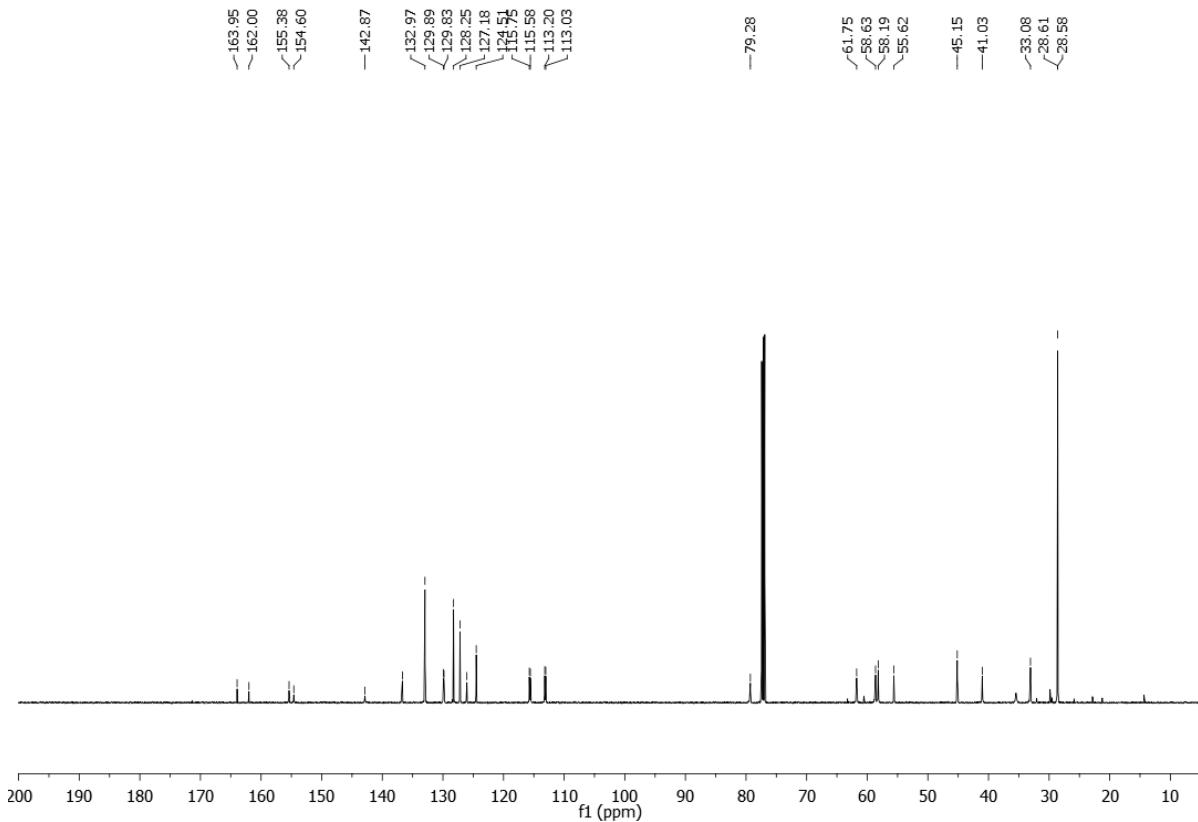

<sup>19</sup>F NMR (471 MHz, CDCl<sub>3</sub>)

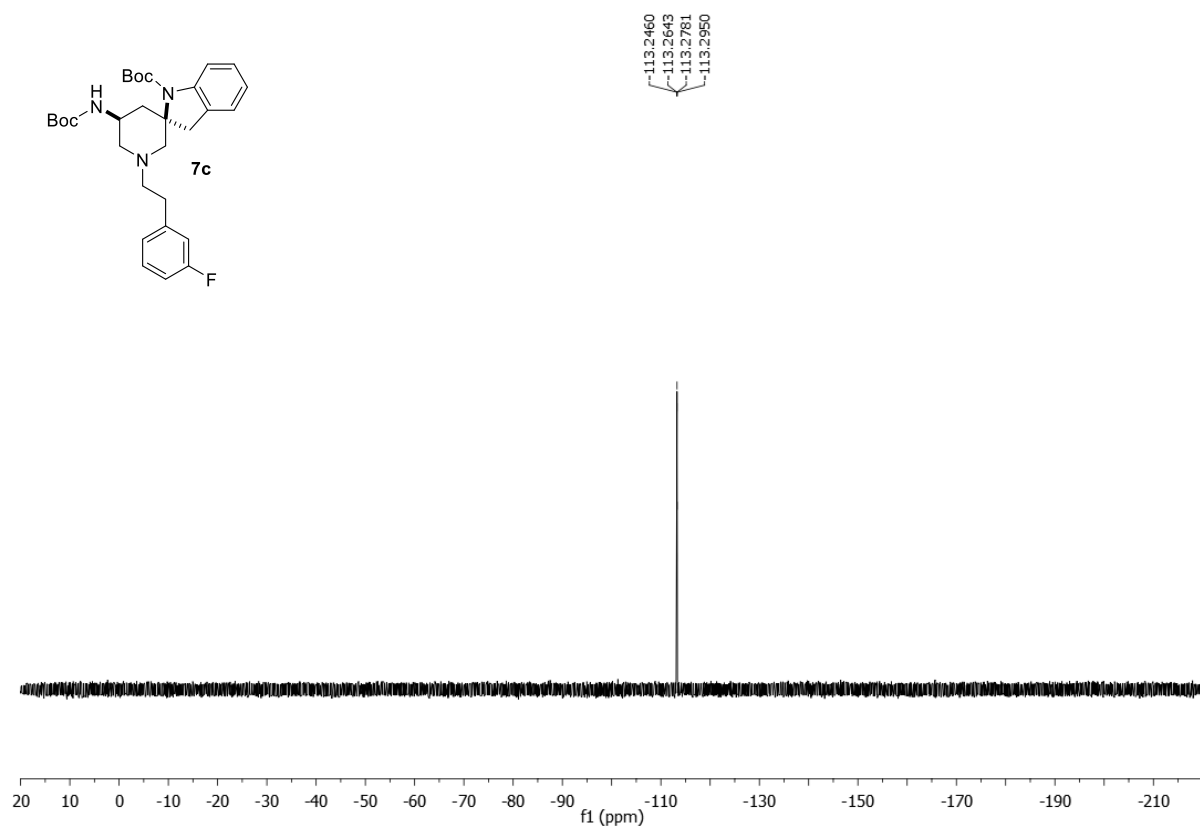

**<sup>1</sup>H NMR (500 MHz, CDCl<sub>3</sub>)**

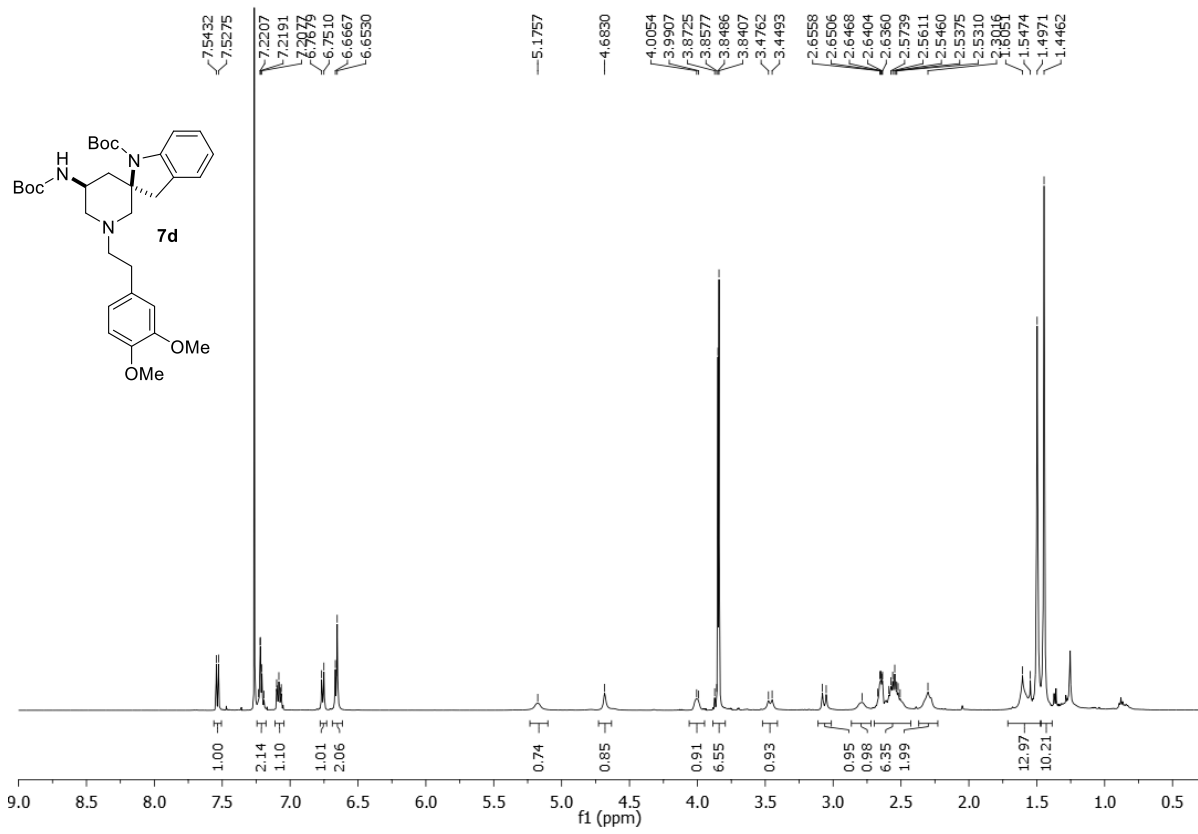

**<sup>13</sup>C{<sup>1</sup>H} NMR (126 MHz, CDCl<sub>3</sub>)**

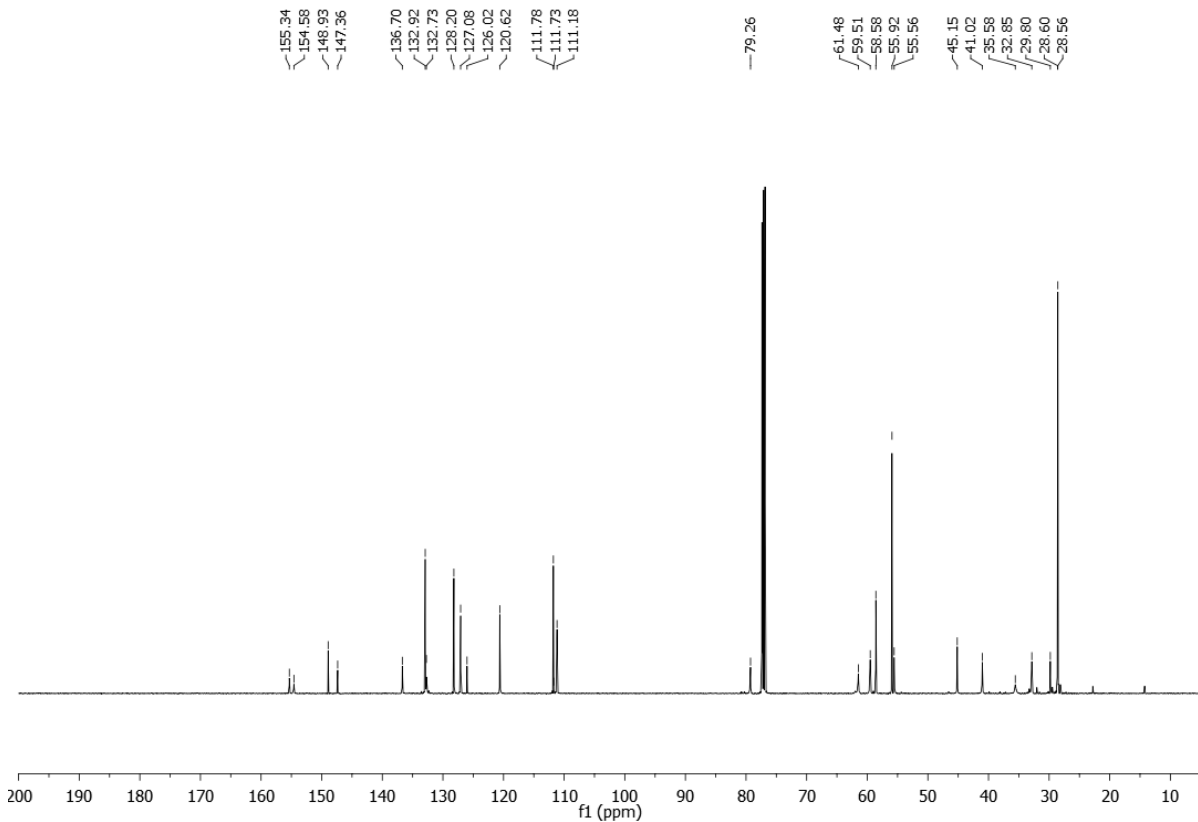

<sup>1</sup>H NMR (500 MHz, CDCl<sub>3</sub>)

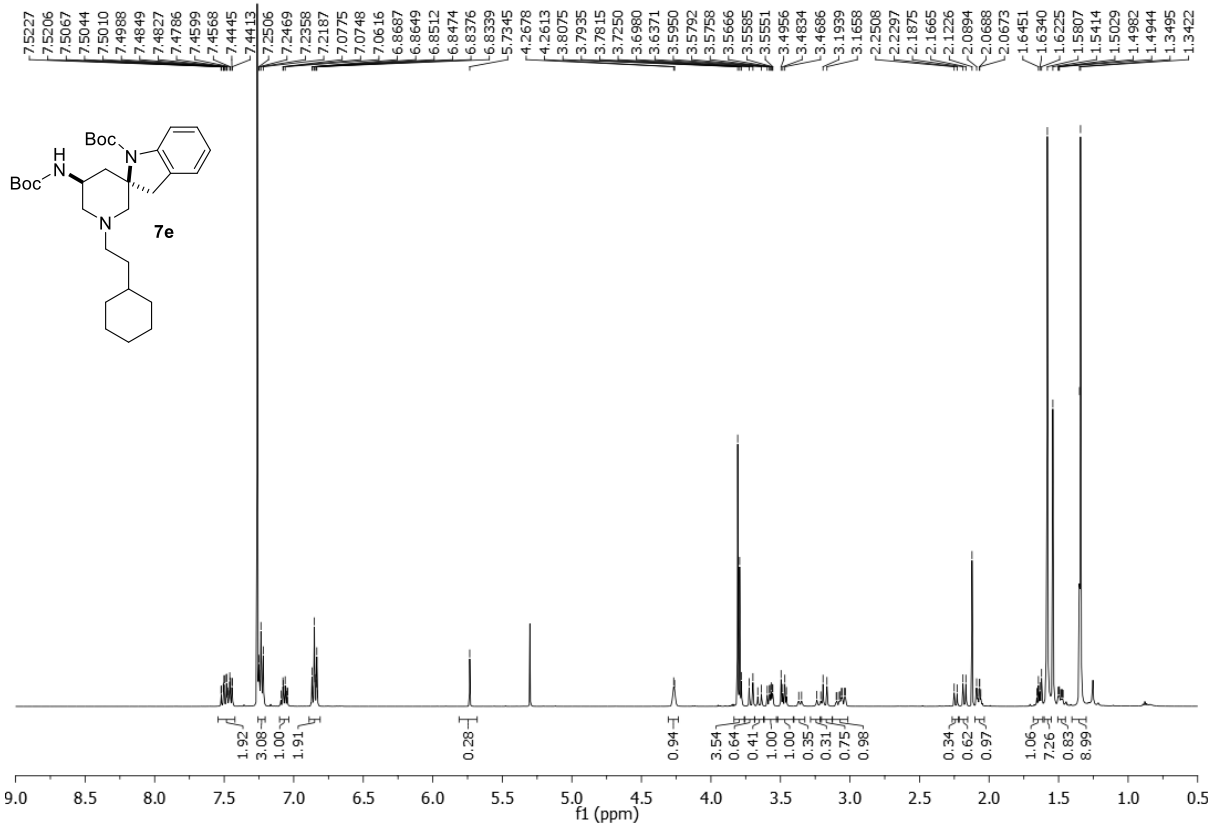

<sup>13</sup>C{<sup>1</sup>H} NMR (126 MHz, CDCl<sub>3</sub>)

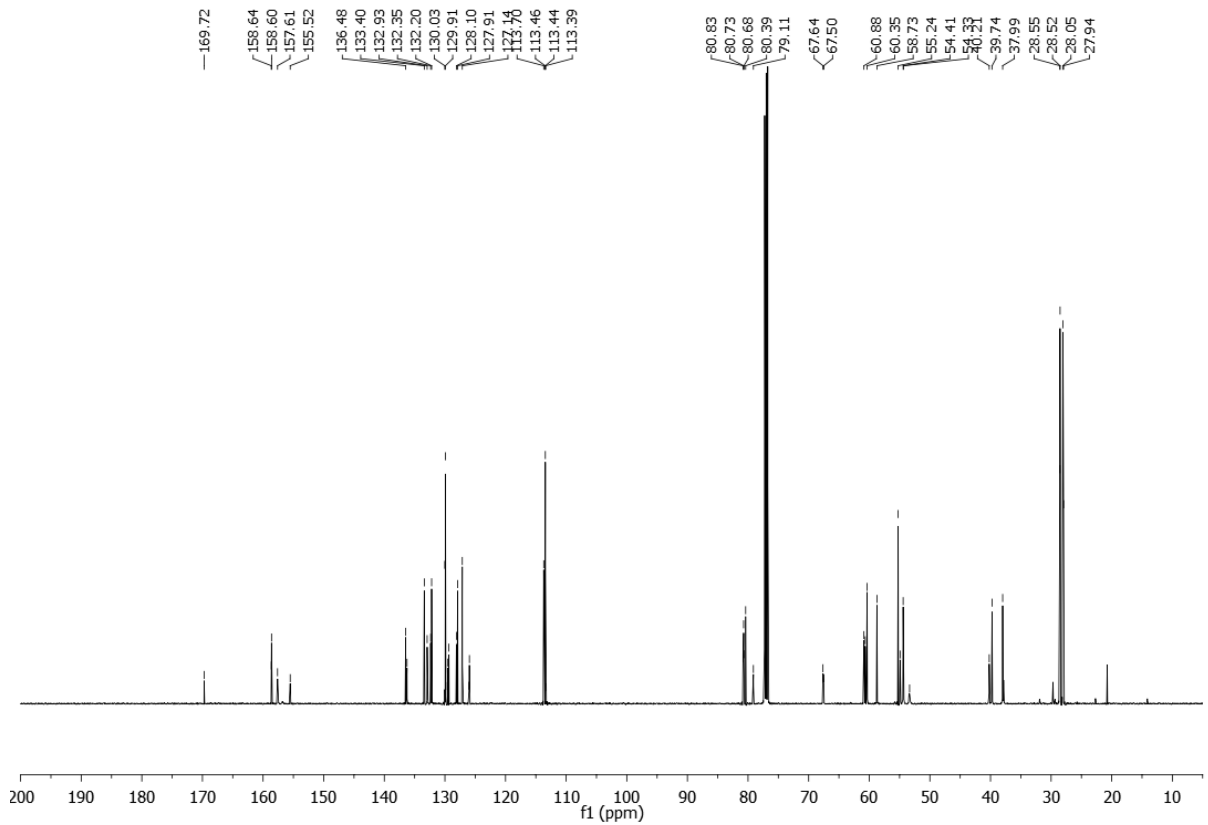



**<sup>1</sup>H NMR (500 MHz, CDCl<sub>3</sub>)**

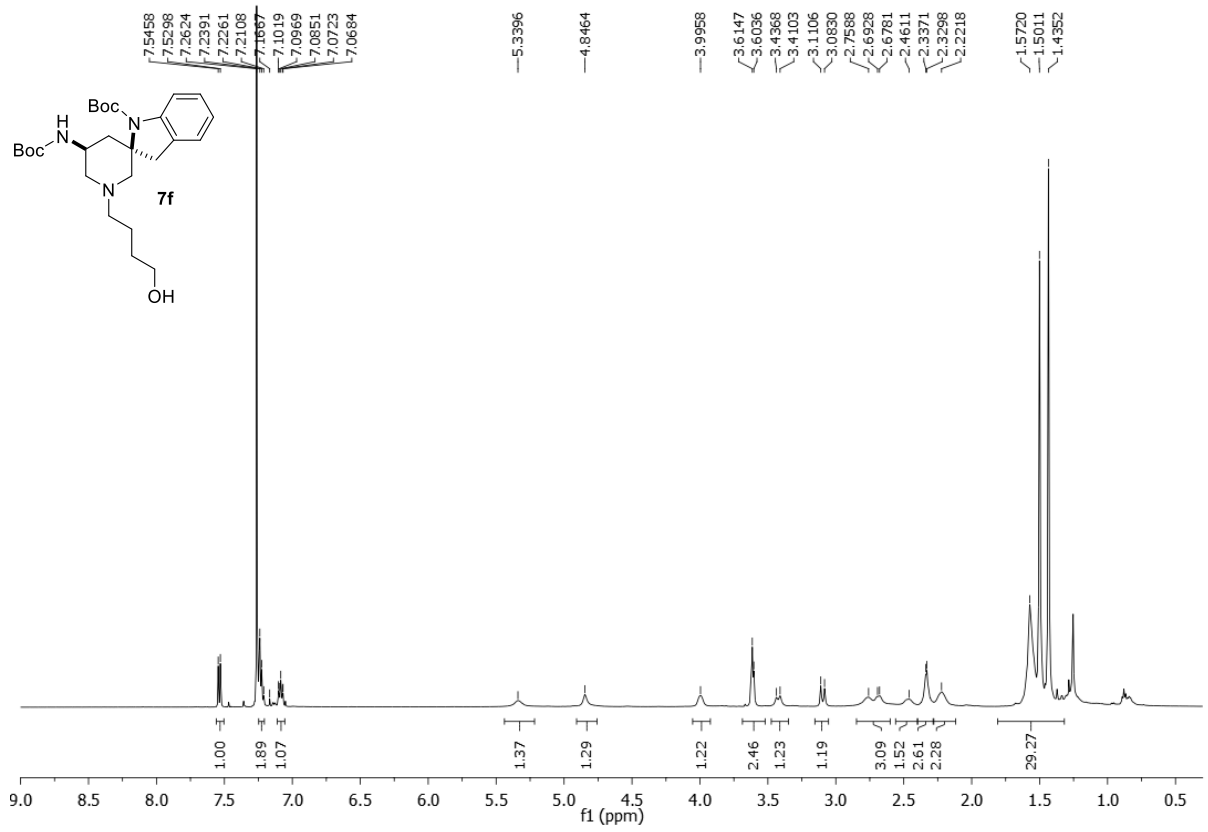

**<sup>13</sup>C{<sup>1</sup>H} NMR (126 MHz, CDCl<sub>3</sub>)**

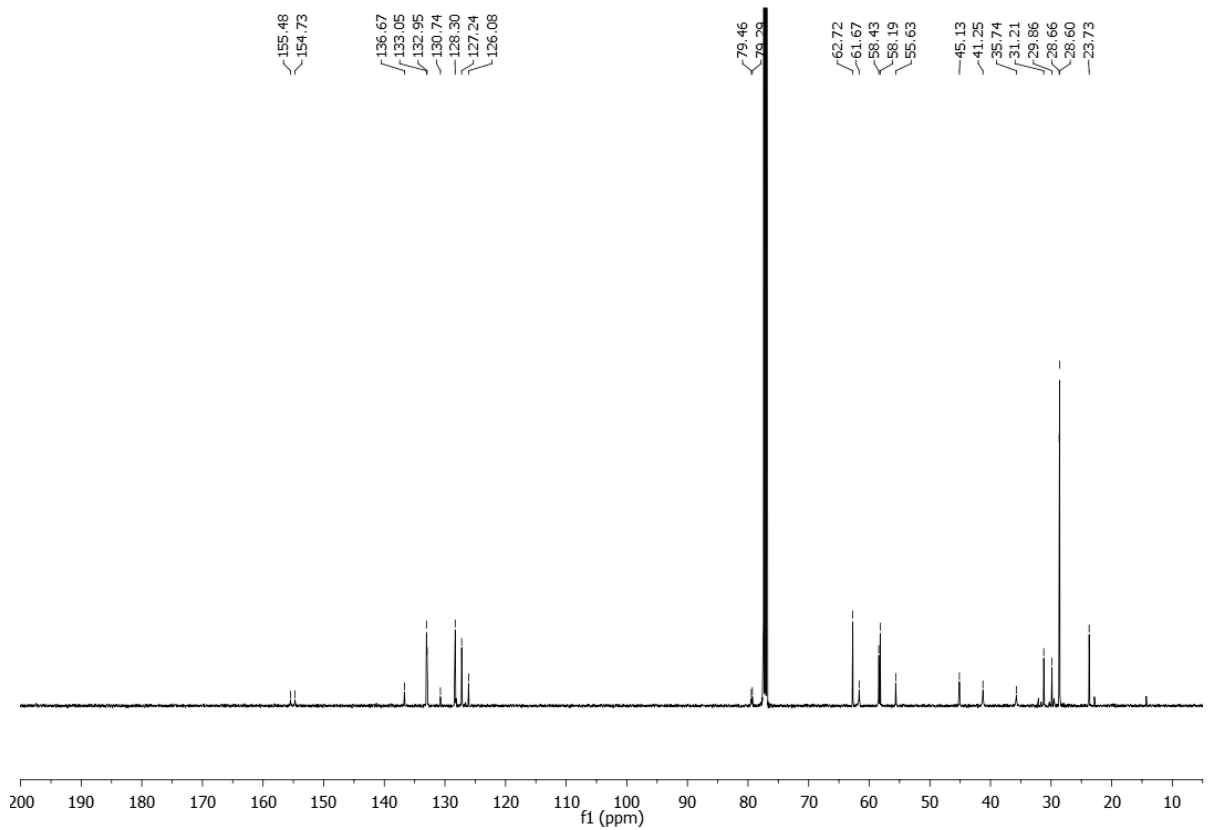

**<sup>1</sup>H NMR (500 MHz, CDCl<sub>3</sub>)**

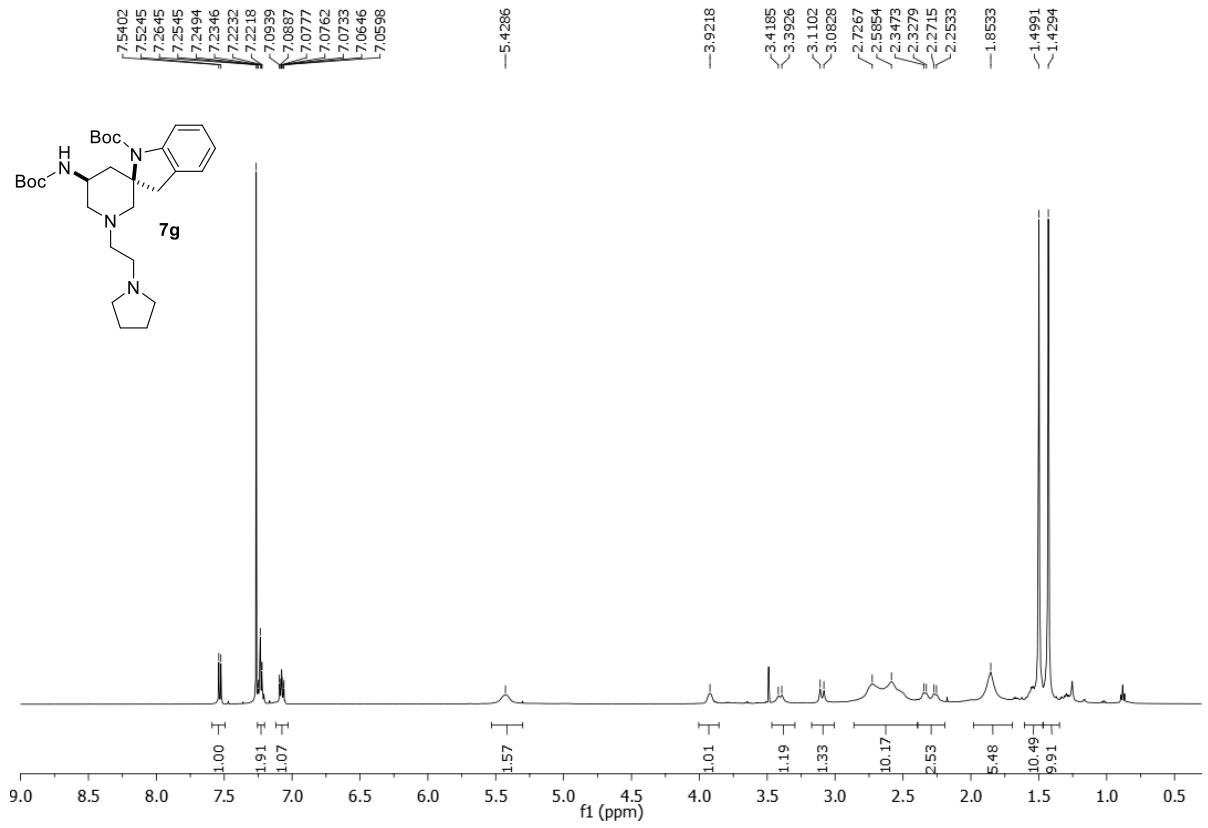

**<sup>13</sup>C{<sup>1</sup>H} NMR (126 MHz, CDCl<sub>3</sub>)**

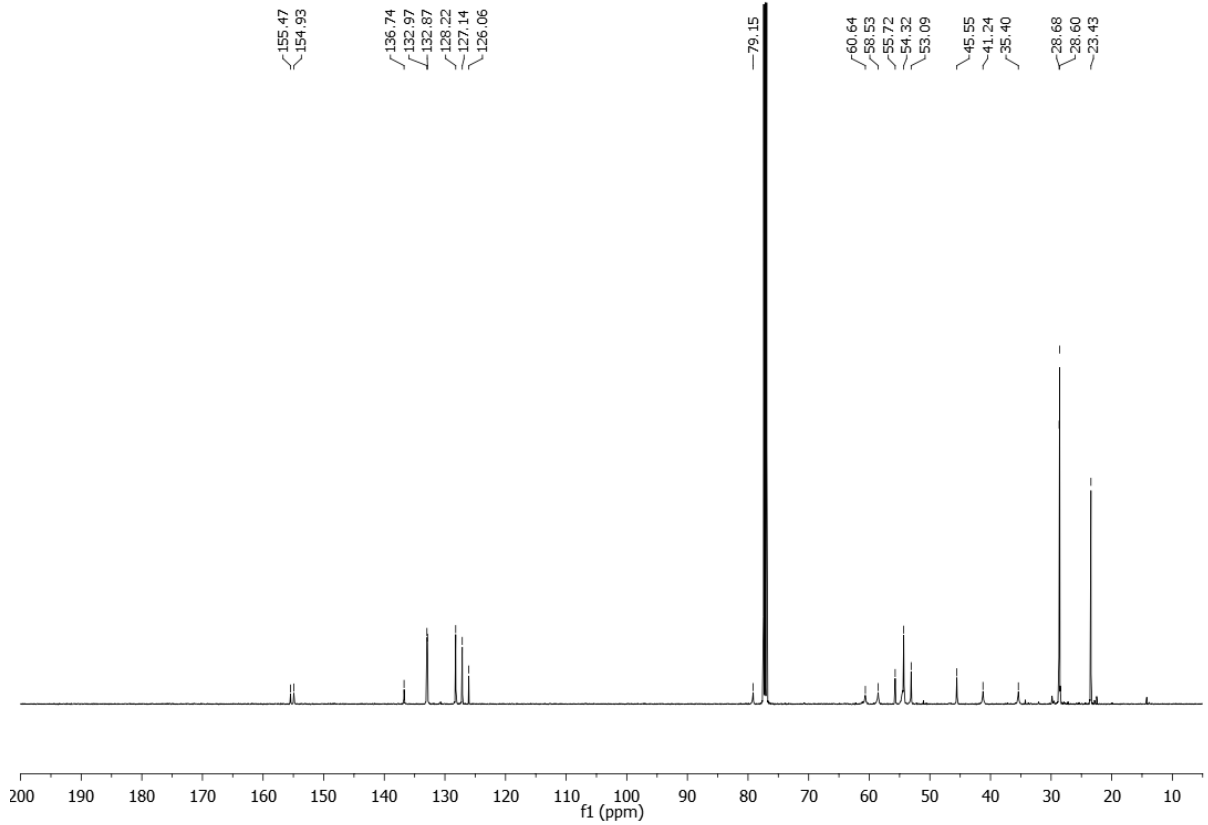

<sup>1</sup>H NMR (500 MHz, CDCl<sub>3</sub>)

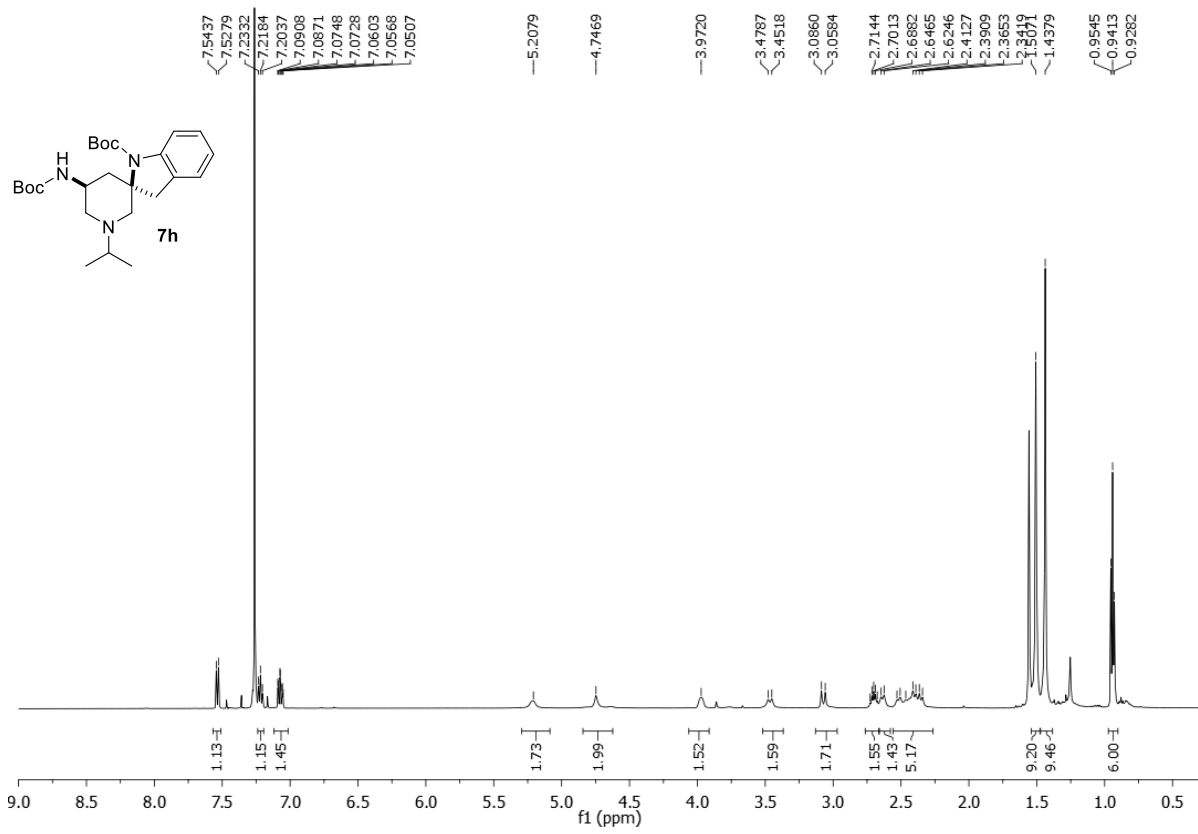

<sup>13</sup>C{<sup>1</sup>H} NMR (126 MHz, CDCl<sub>3</sub>)

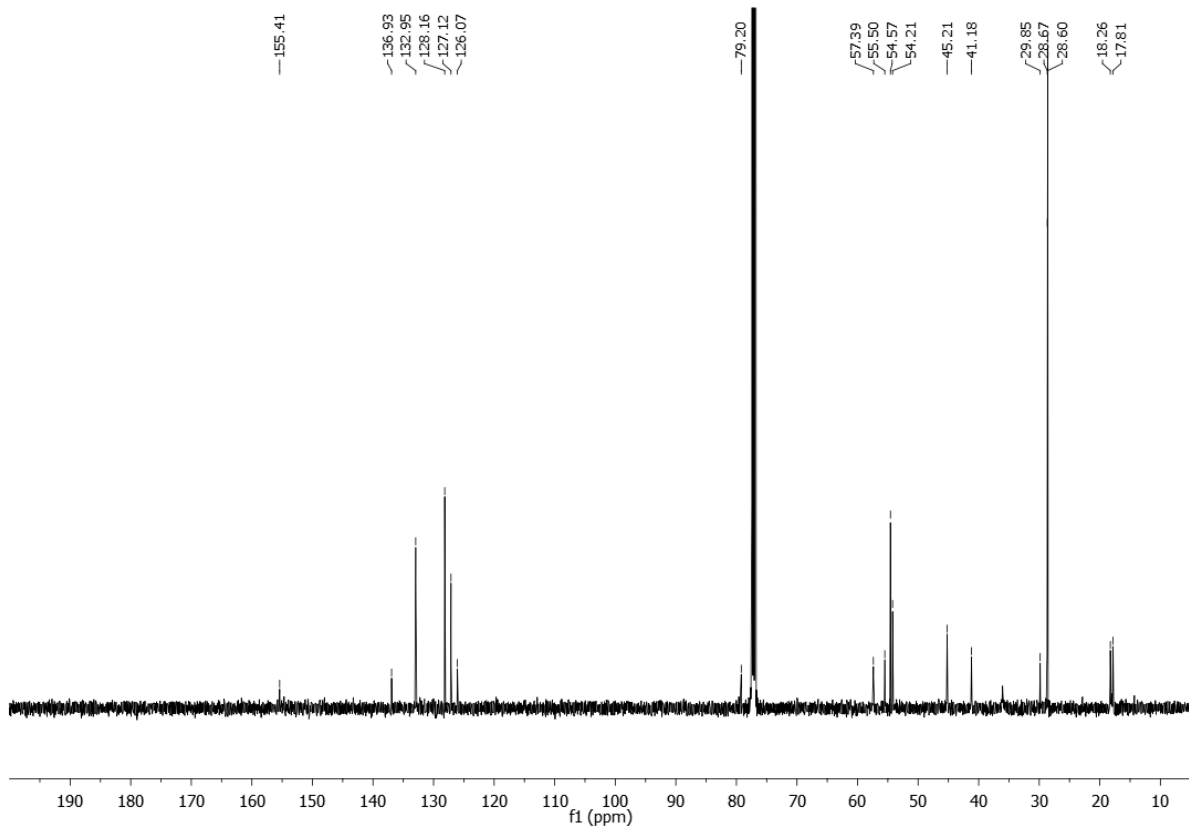

<sup>1</sup>H NMR (500 MHz, D<sub>2</sub>O)

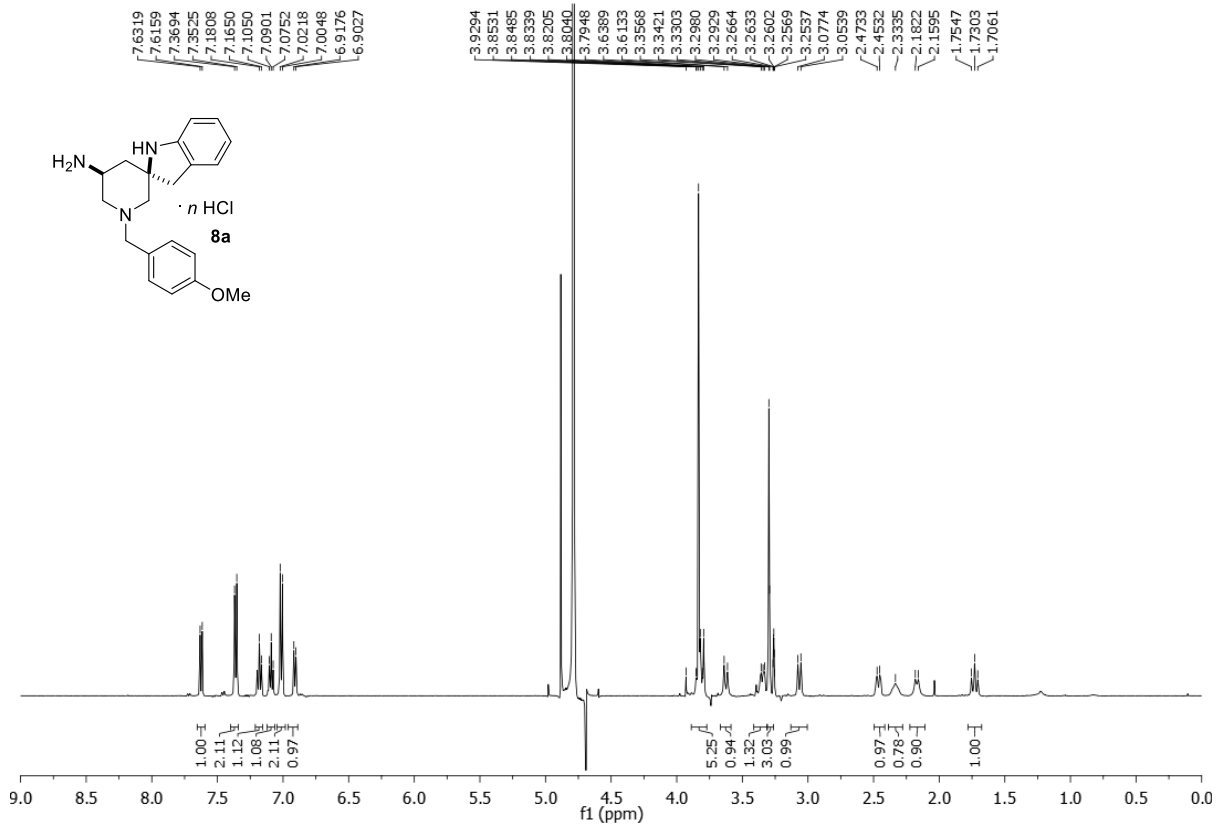

<sup>13</sup>C{<sup>1</sup>H} NMR (126 MHz, D<sub>2</sub>O)

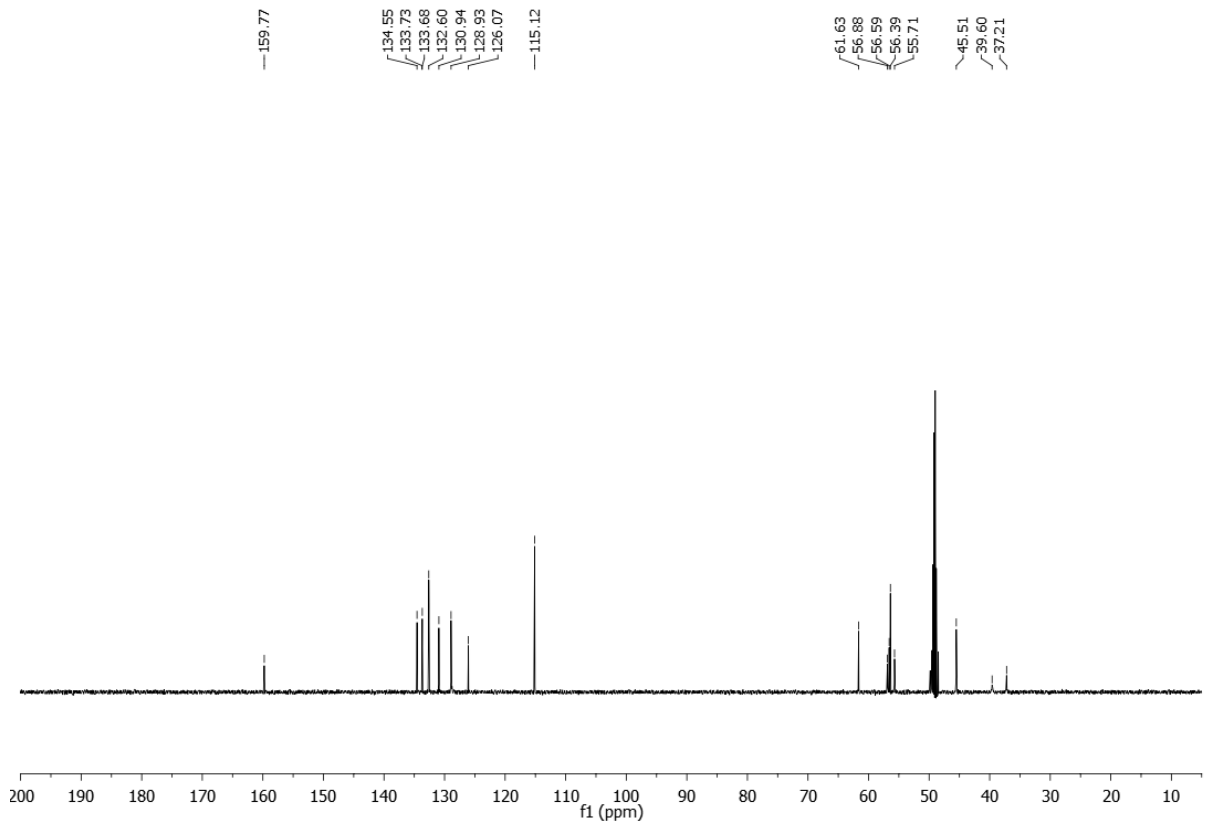

<sup>1</sup>H NMR (500 MHz, CD<sub>3</sub>OD)

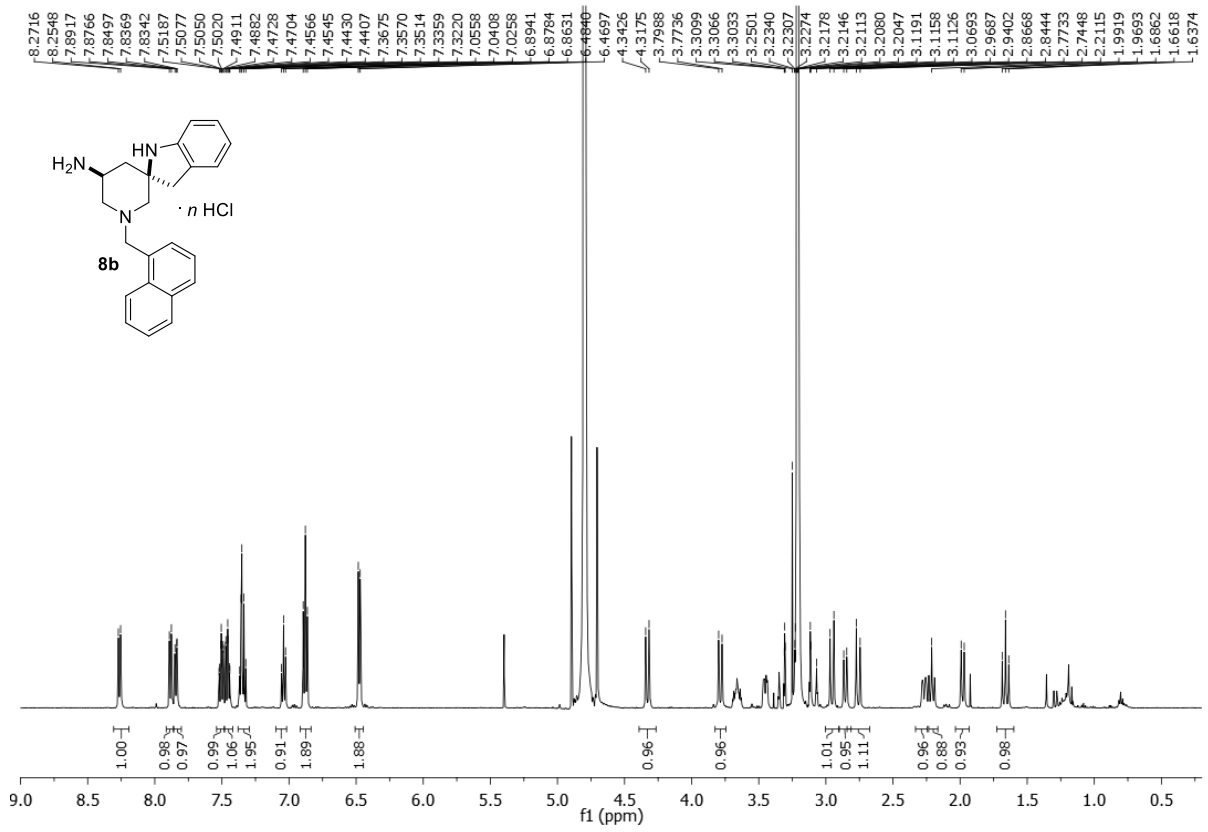

<sup>13</sup>C{<sup>1</sup>H} NMR (126 MHz, CD<sub>3</sub>OD)

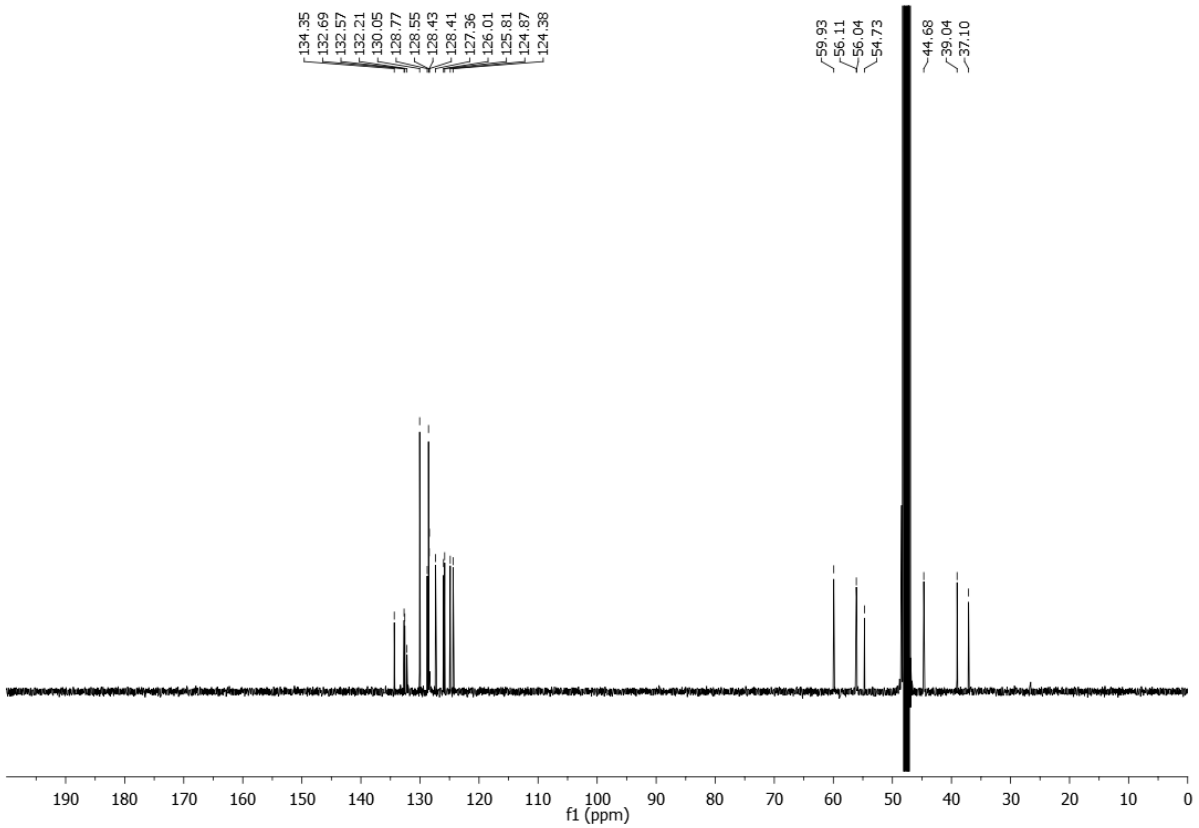

<sup>1</sup>H NMR (500 MHz, D<sub>2</sub>O)

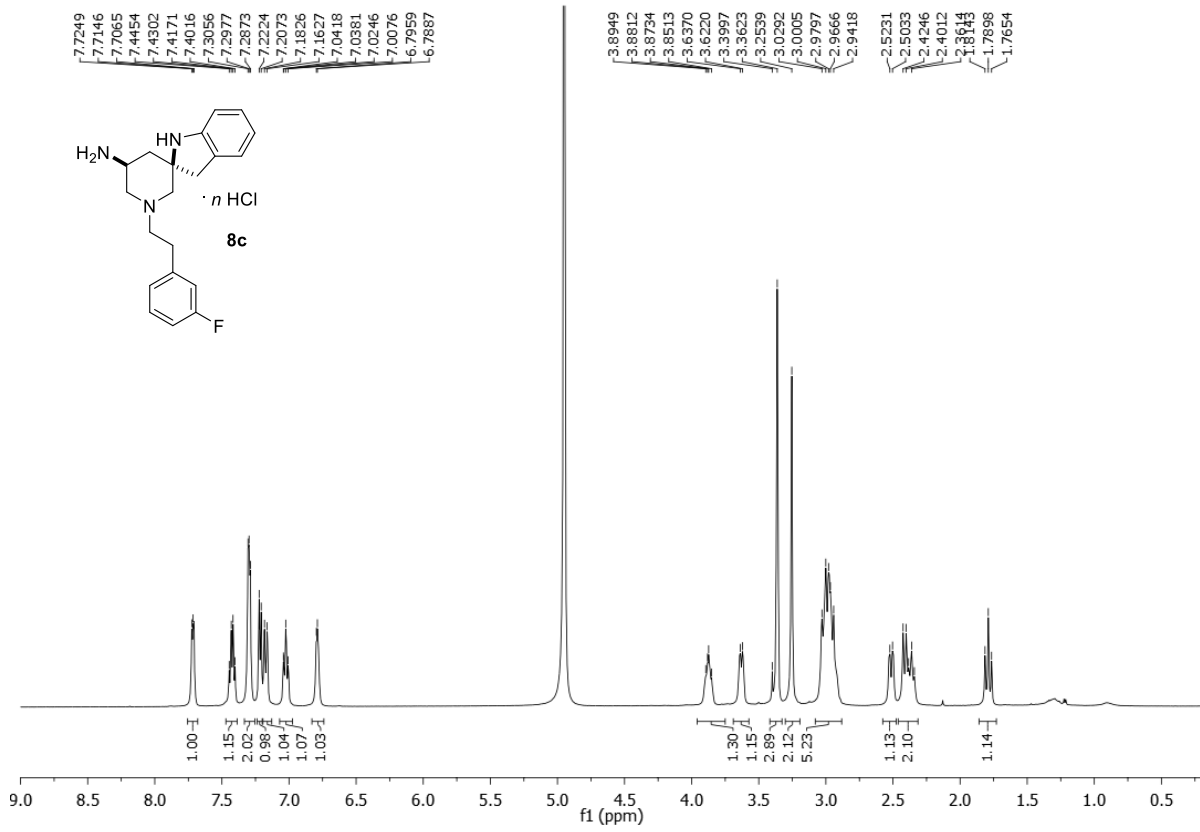

<sup>13</sup>C{<sup>1</sup>H} NMR (126 MHz, D<sub>2</sub>O)

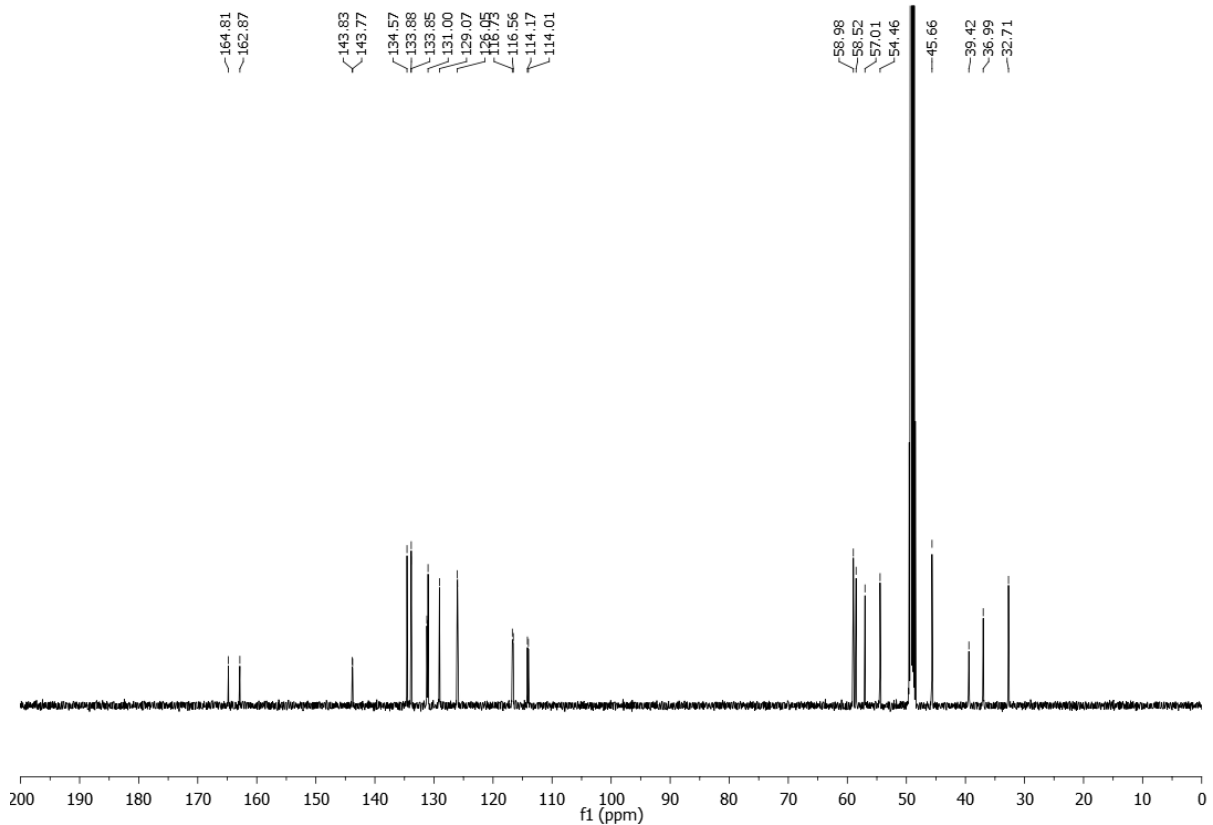

**<sup>19</sup>F NMR (471 MHz, D<sub>2</sub>O)**

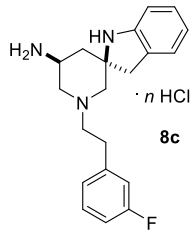

---114.2146

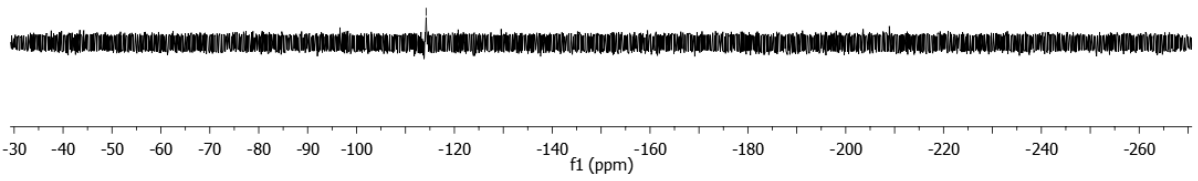

<sup>1</sup>H NMR (500 MHz, D<sub>2</sub>O)

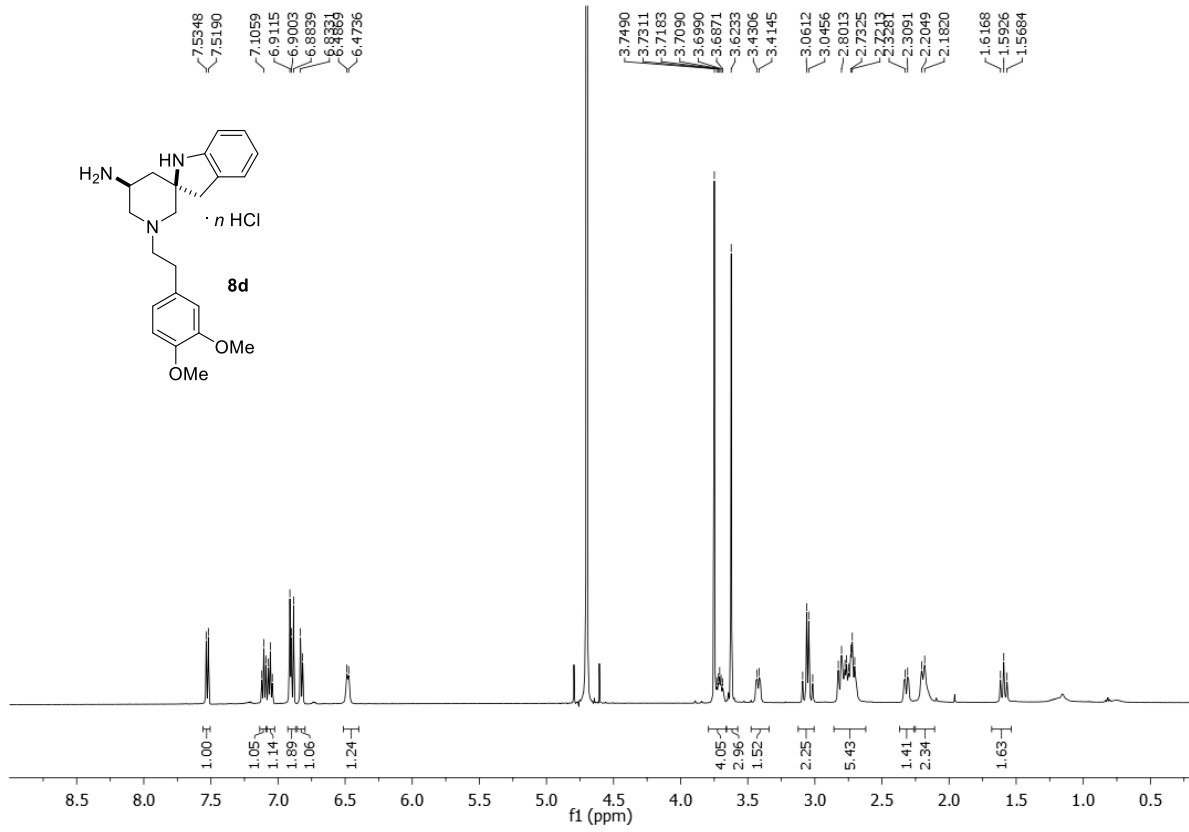

<sup>13</sup>C{<sup>1</sup>H} NMR (126 MHz, D<sub>2</sub>O)

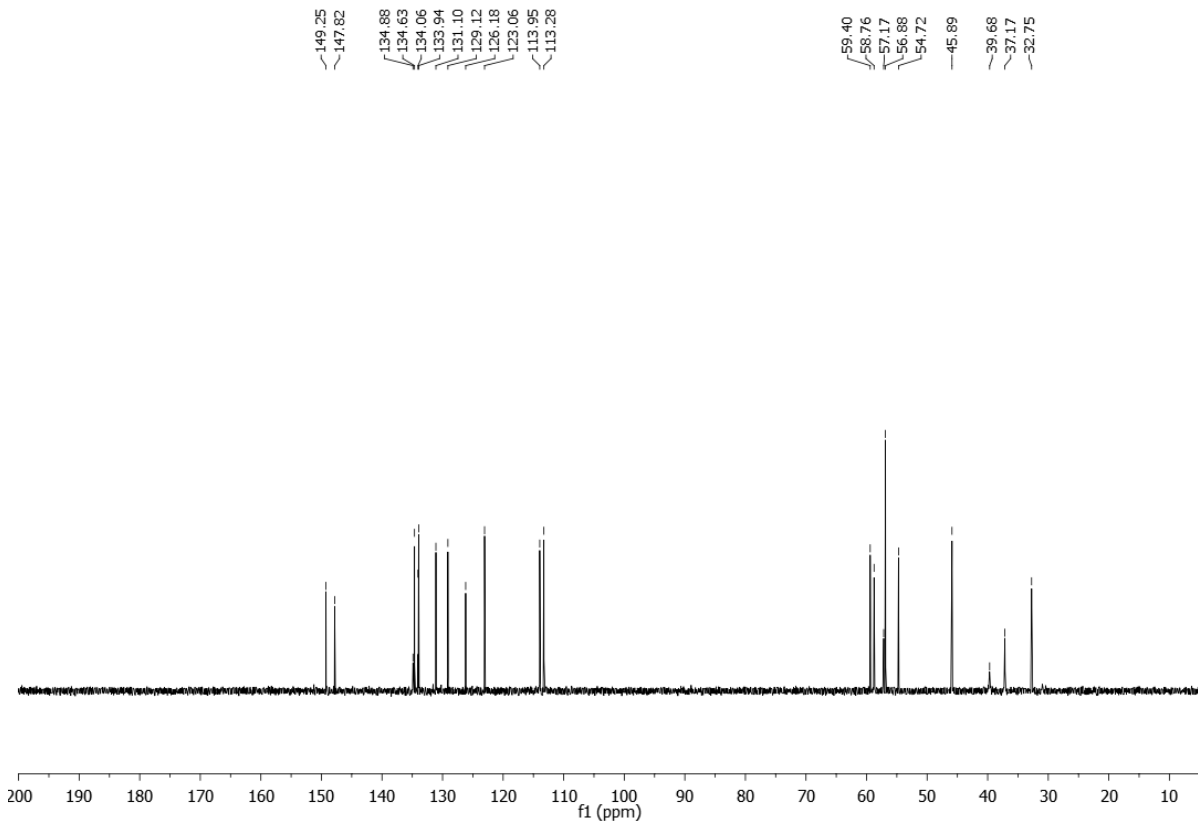



<sup>1</sup>H NMR (500 MHz, D<sub>2</sub>O)

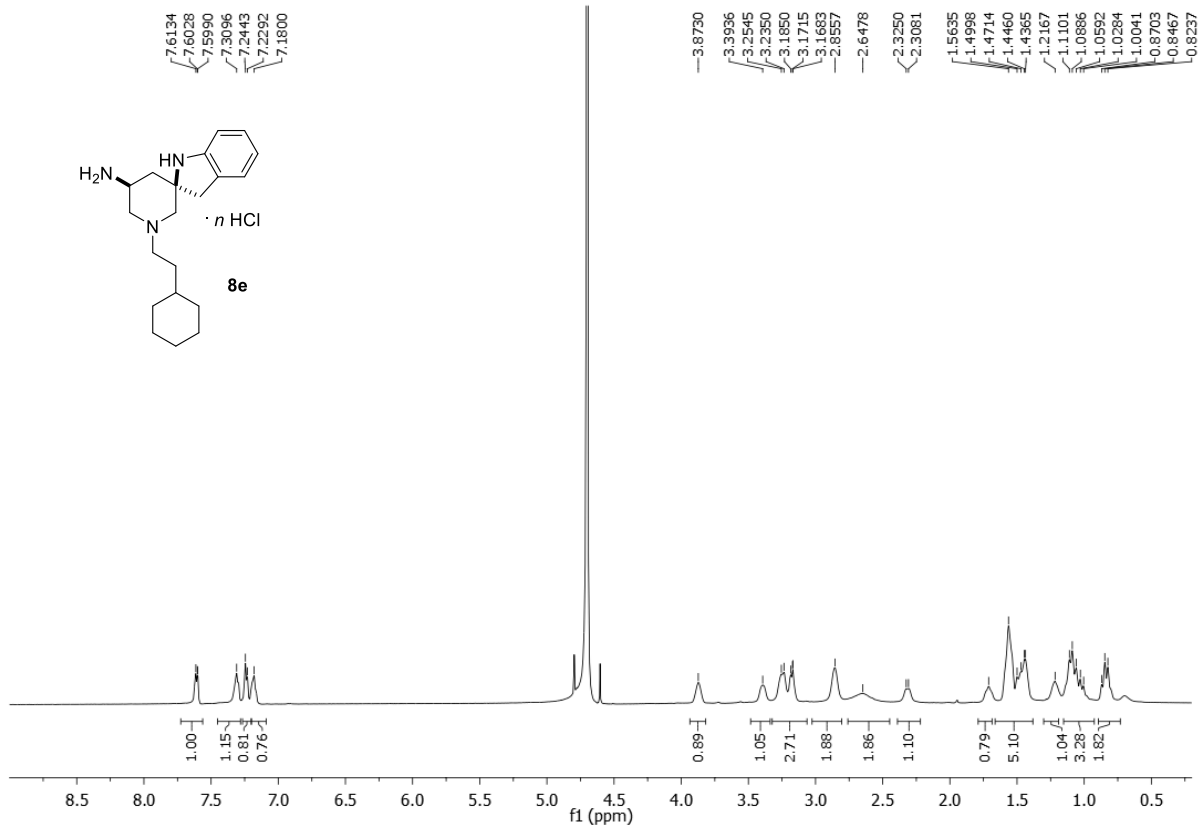

<sup>13</sup>C{<sup>1</sup>H} NMR (126 MHz, D<sub>2</sub>O)

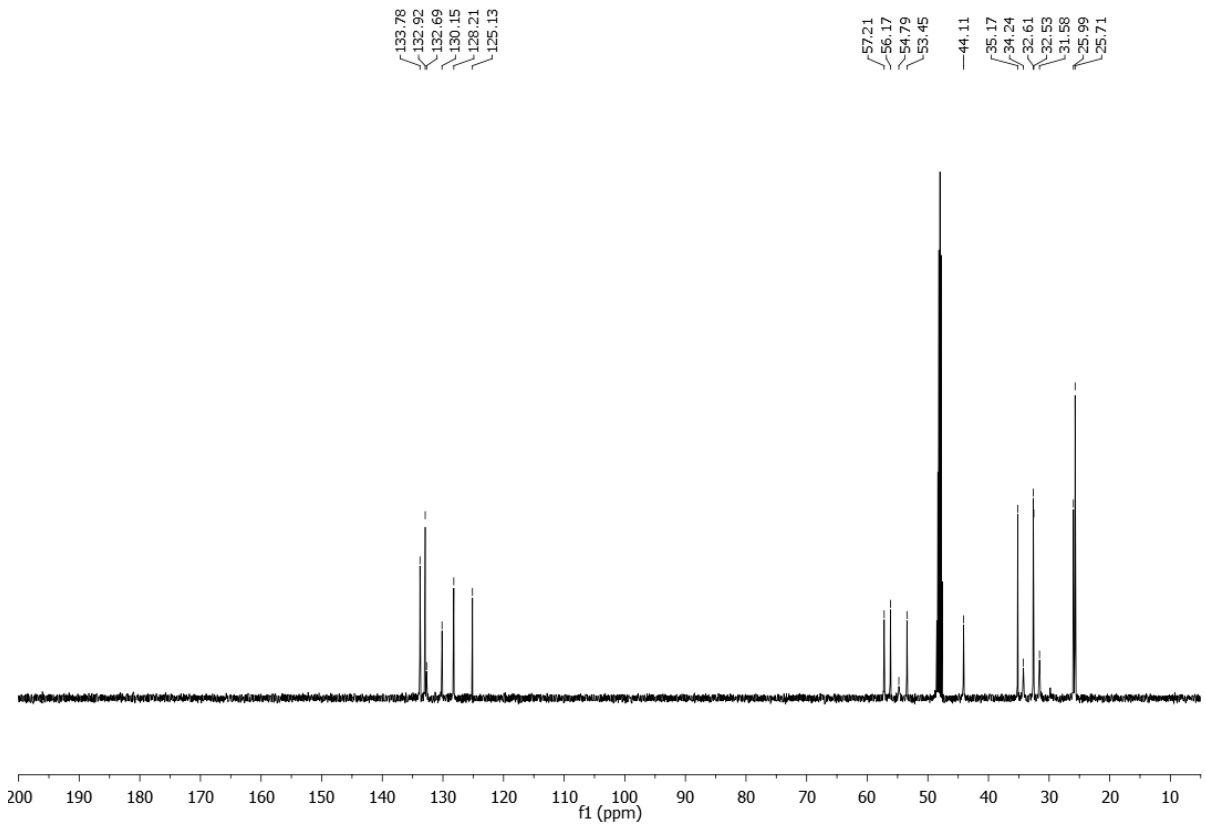

<sup>1</sup>H NMR (500 MHz, D<sub>2</sub>O)

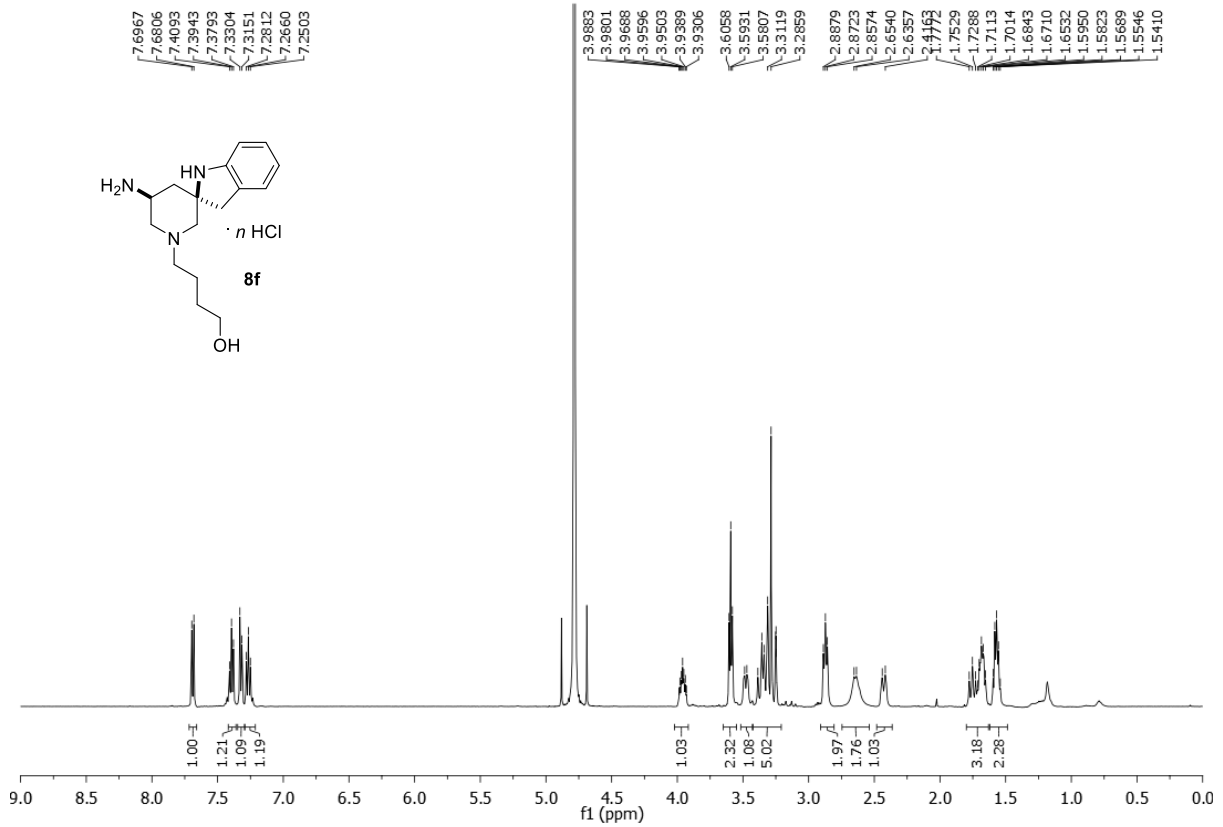

<sup>13</sup>C{<sup>1</sup>H} NMR (126 MHz, D<sub>2</sub>O)

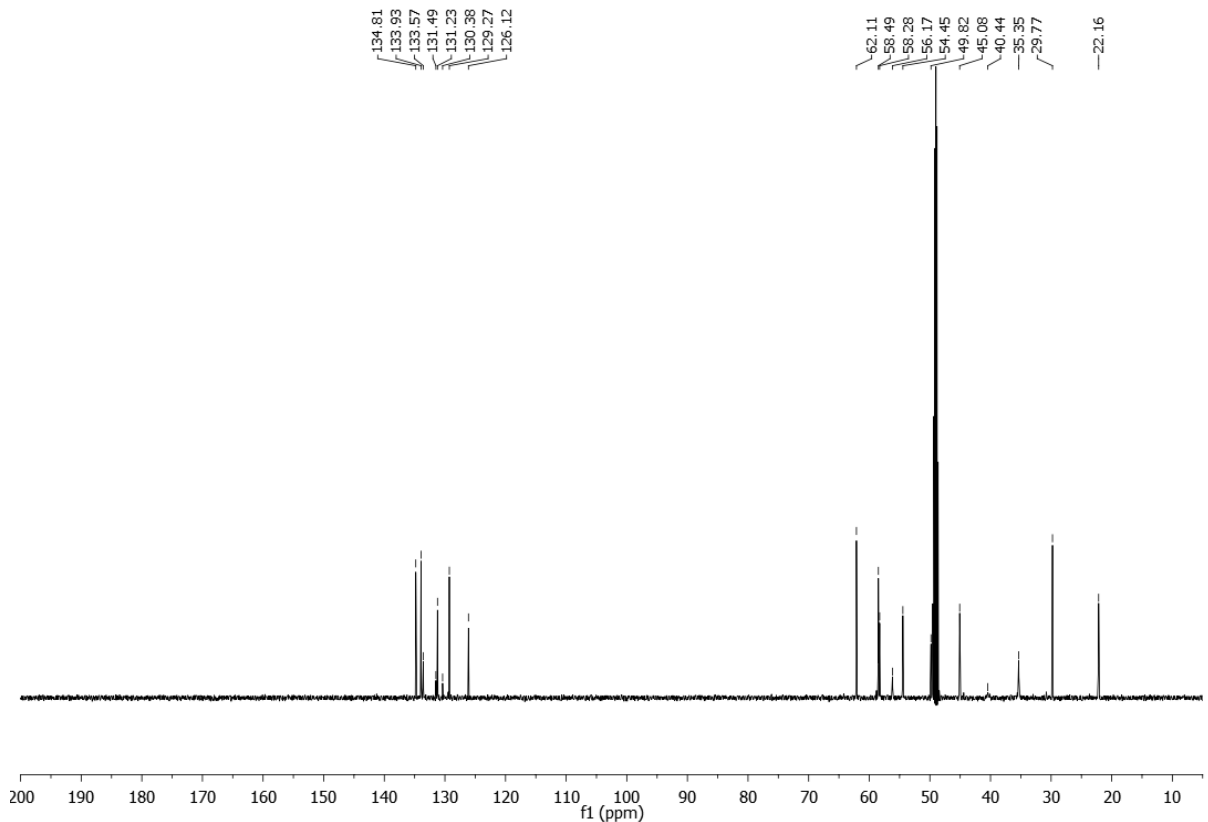

<sup>1</sup>H NMR (500 MHz, D<sub>2</sub>O)

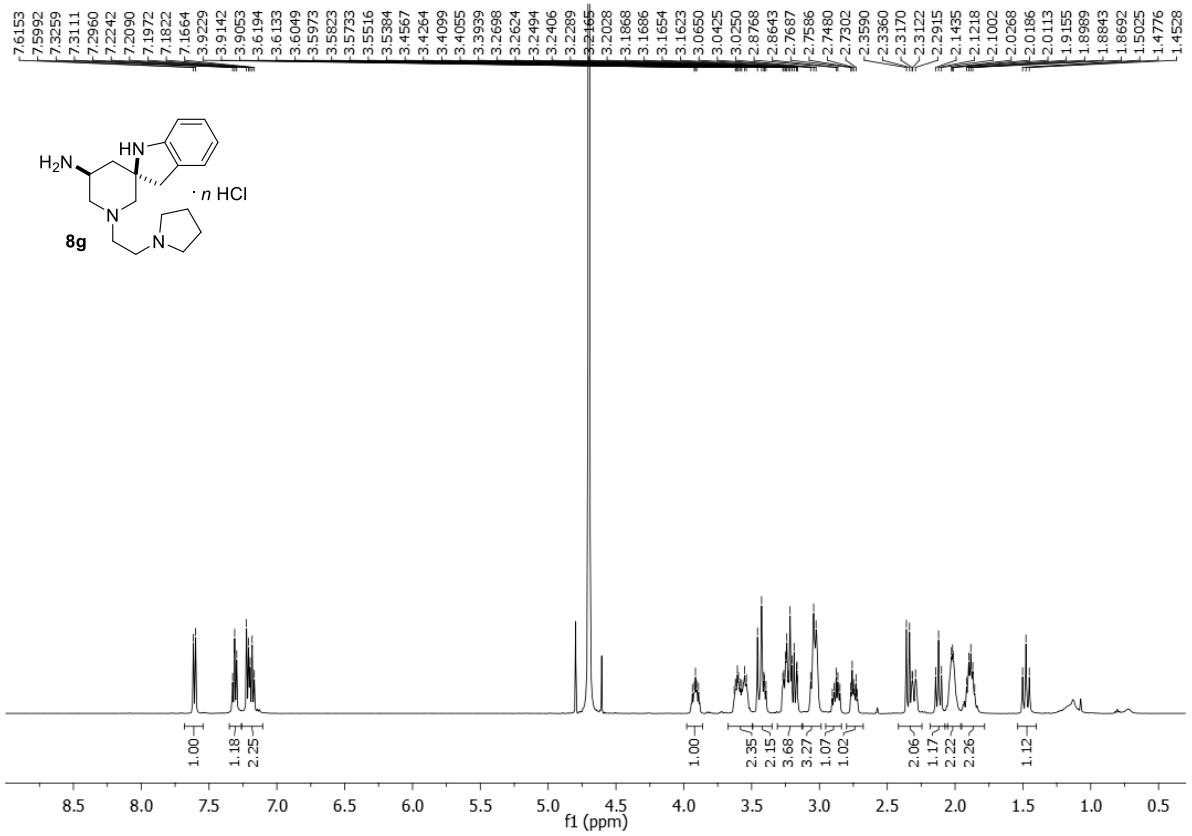

<sup>13</sup>C{<sup>1</sup>H} NMR (126 MHz, D<sub>2</sub>O)

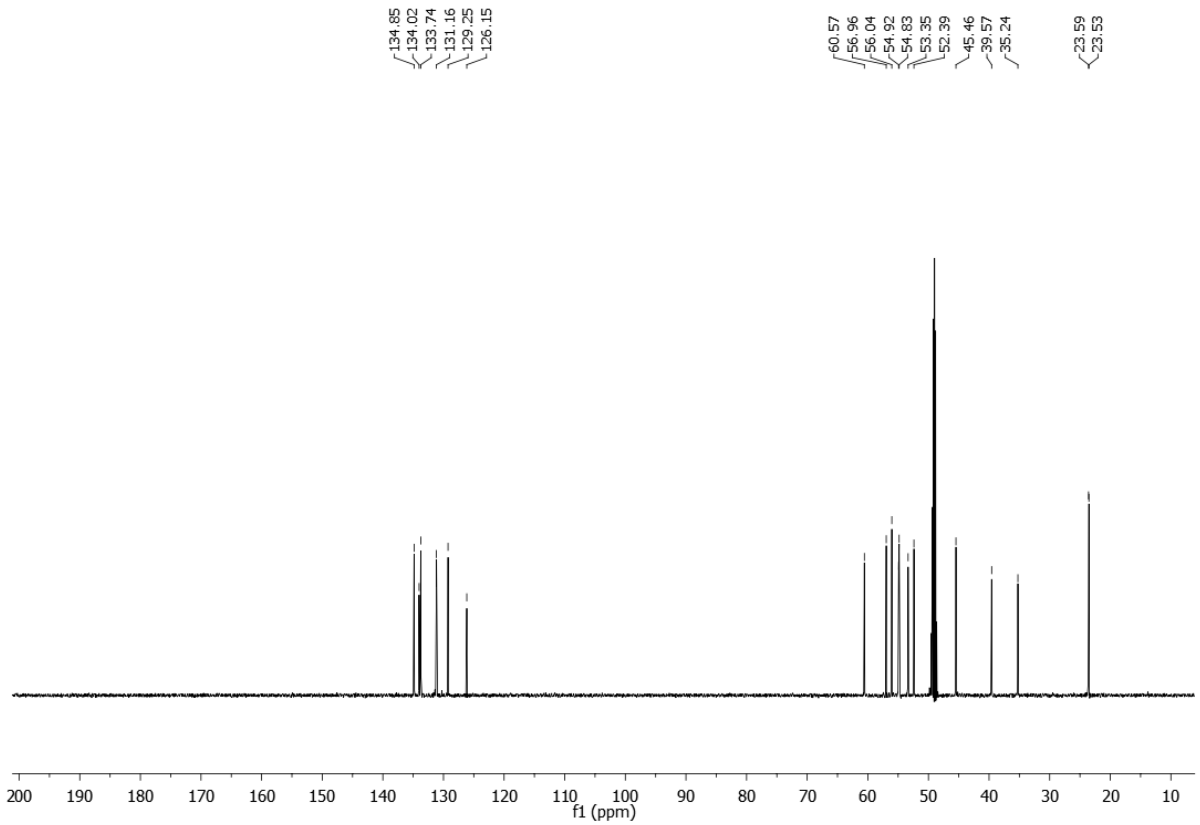

**<sup>1</sup>H NMR (500 MHz, D<sub>2</sub>O)**

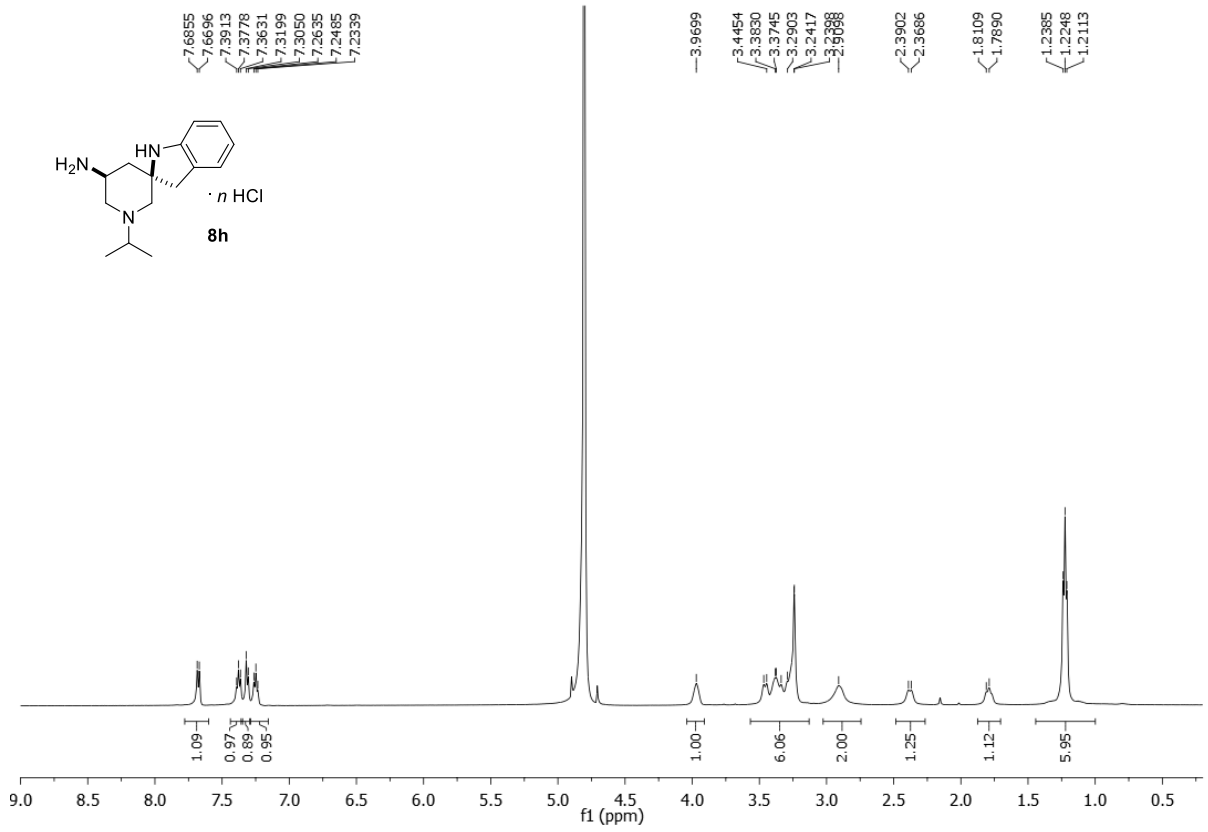

**<sup>13</sup>C{<sup>1</sup>H} NMR (126 MHz, D<sub>2</sub>O)**

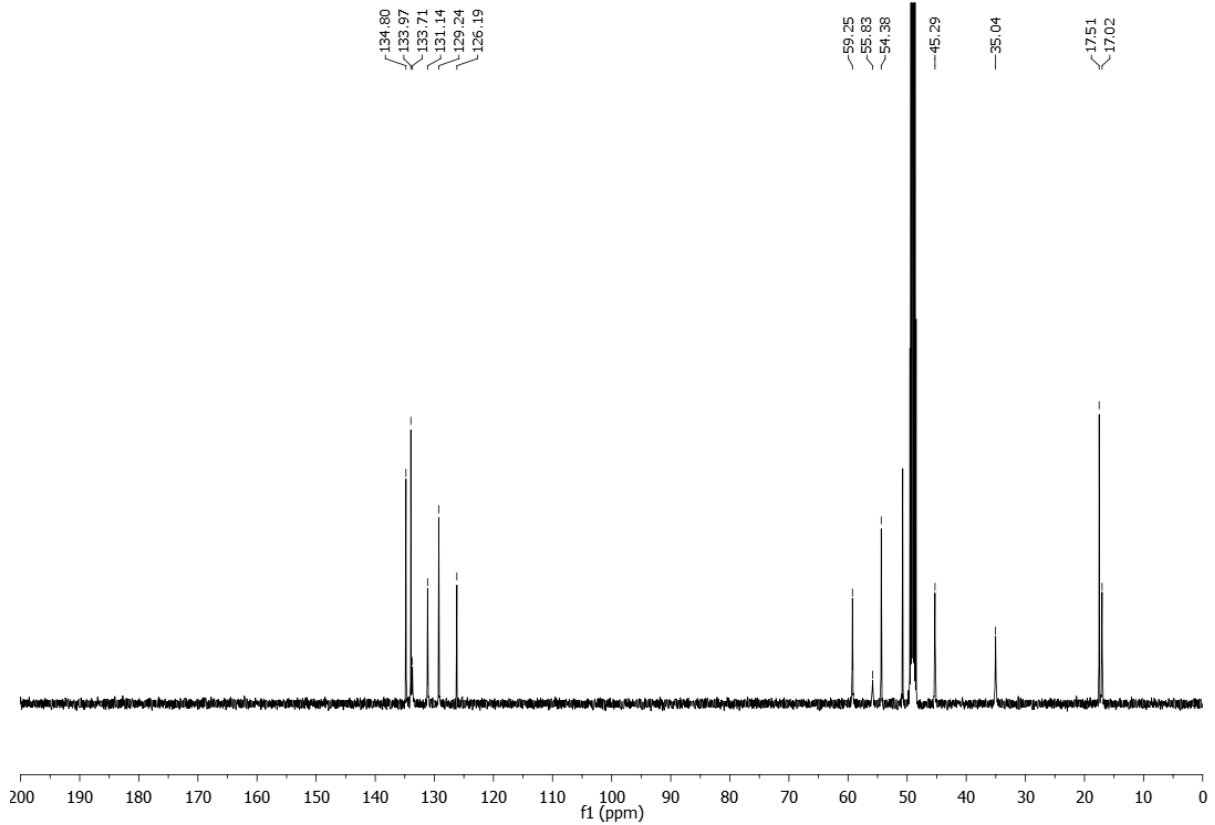

Supplement: d3ob00406f1.pdf [file d3ob00406f1.pdf]
